# Supplementary material for: Systematic Identification of Cyclic-di-GMP Binding Proteins in Vibrio cholerae Reveals a Novel Class of Cyclic-di-GMP-Binding ATPases Associated with Type II Secretion Systems
Source: PubMed Central journal article supplement (PMC4624772; doi:10.1371/journal.ppat.1005232), 2015-10-27

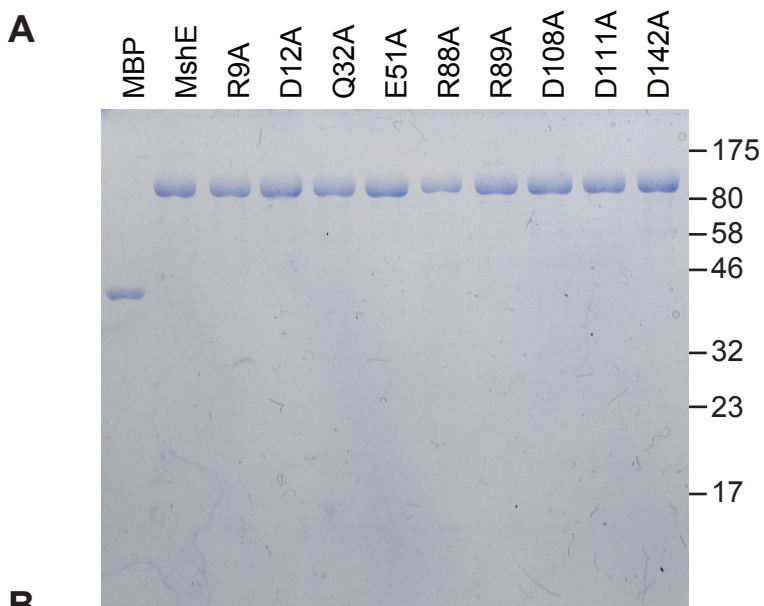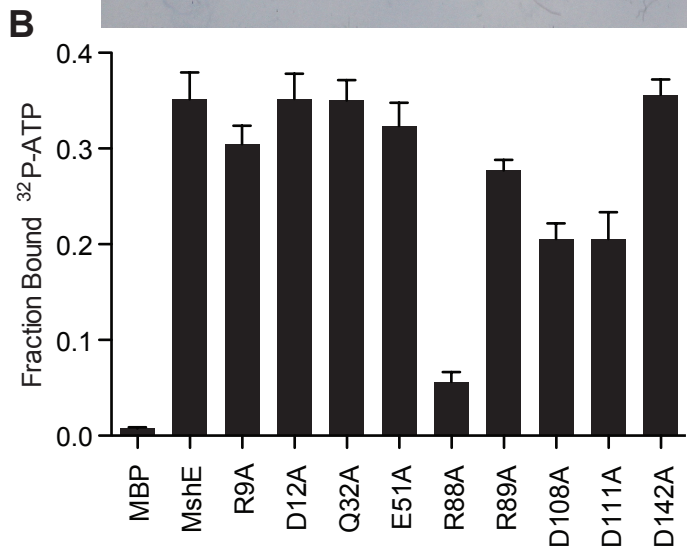

Supplement: ppat.1005232.s004.pdf [file ppat.1005232.s004.pdf]
