# Supplementary material for: Systematic Identification of Cyclic-di-GMP Binding Proteins in Vibrio cholerae Reveals a Novel Class of Cyclic-di-GMP-Binding ATPases Associated with Type II Secretion Systems
Source: PubMed Central journal article supplement (PMC4624772; doi:10.1371/journal.ppat.1005232), 2015-10-27
Supplement: ppat.1005232.s007.pdf [file ppat.1005232.s007.pdf]

**S1 Table:** Fraction Bound <sup>32</sup>P-c-di-GMP in Primary DRaCALA Screen of *V. cholerae* ORFs

| VC ORF # | His-ORF Fraction Bound |             | His-MBP-ORF Fraction Bound |             |
|----------|------------------------|-------------|----------------------------|-------------|
|          | Replicate 1            | Replicate 2 | Replicate 1                | Replicate 2 |
| VC0001   | 0.09                   | 0.07        | 0.02                       | 0.00        |
| VC0002   | 0.04                   | 0.05        | 0.06                       | 0.06        |
| VC0003   | 0.04                   | 0.03        | 0.07                       | 0.08        |
| VC0004   | 0.04                   | 0.06        | 0.06                       | 0.08        |
| VC0005   | 0.09                   | 0.05        | 0.05                       | 0.07        |
| VC0006   | 0.03                   | 0.04        | 0.06                       | 0.05        |
| VC0007   | 0.00                   | 0.04        | 0.05                       | 0.06        |
| VC0008   | 0.03                   | 0.04        | 0.06                       | 0.04        |
| VC0009   | 0.05                   | 0.06        | 0.06                       | 0.07        |
| VC0010   | 0.05                   | 0.05        | 0.05                       | 0.06        |
| VC0011   | 0.05                   | 0.05        | 0.03                       | 0.03        |
| VC0012   | 0.01                   | 0.02        | 0.01                       | 0.02        |
| VC0013   | 0.01                   | 0.01        | 0.02                       | 0.00        |
| VC0014   | 0.03                   | 0.04        | 0.04                       | 0.03        |
| VC0015   | 0.05                   | 0.08        | 0.05                       | 0.05        |
| VC0016   | 0.04                   | 0.06        | 0.05                       | 0.04        |
| VC0017   | 0.09                   | 0.09        | 0.03                       | 0.05        |
| VC0018   | 0.02                   | 0.02        | 0.06                       | 0.09        |
| VC0019   | 0.06                   | 0.06        | 0.05                       | 0.06        |
| VC0020   | 0.09                   | 0.10        | 0.02                       | 0.02        |
| VC0021   | 0.04                   | 0.03        | 0.09                       | 0.13        |
| VC0022   | 0.04                   | 0.04        | 0.04                       | 0.02        |
| VC0023   | 0.10                   | 0.10        | 0.01                       | 0.03        |
| VC0024   | 0.04                   | 0.05        | 0.08                       | 0.06        |
| VC0025   | 0.10                   | 0.10        | 0.03                       | 0.05        |
| VC0026   | 0.04                   | 0.05        | 0.08                       | 0.06        |
| VC0027   | 0.03                   | 0.05        | 0.07                       | 0.04        |
| VC0028   | 0.03                   | 0.03        | 0.10                       | 0.06        |
| VC0029   | 0.03                   | 0.02        | 0.06                       | 0.08        |
| VC0030   | 0.06                   | 0.06        | 0.06                       | 0.08        |
| VC0031   | 0.05                   | 0.06        | 0.04                       | 0.04        |
| VC0032   | 0.08                   | 0.08        | 0.03                       | 0.03        |
| VC0033   | 0.08                   | 0.08        | 0.04                       | 0.09        |
| VC0034   | 0.05                   | 0.04        | 0.04                       | 0.05        |
| VC0035   | 0.05                   | 0.05        | 0.05                       | 0.04        |
| VC0036   | 0.03                   | 0.04        | 0.04                       | 0.05        |
| VC0037   | 0.07                   | 0.10        | 0.06                       | 0.07        |
| VC0038   | 0.09                   | 0.06        | 0.06                       | 0.05        |

|        |       |      |      |      |
|--------|-------|------|------|------|
| VC0039 | 0.04  | 0.04 | 0.04 | 0.05 |
| VC0040 | 0.04  | 0.07 | 0.06 | 0.06 |
| VC0041 | 0.03  | 0.05 | 0.06 | 0.06 |
| VC0042 | -0.01 | 0.00 | 0.06 | 0.06 |
| VC0043 | 0.01  | 0.03 | 0.05 | 0.04 |
| VC0044 | 0.04  | 0.06 | 0.04 | 0.05 |
| VC0045 | 0.04  | 0.06 | 0.04 | 0.06 |
| VC0046 | 0.03  | 0.03 | 0.00 | 0.00 |
| VC0047 | 0.02  | 0.01 | 0.01 | 0.02 |
| VC0048 | 0.03  | 0.03 | 0.04 | 0.04 |
| VC0049 | 0.04  | 0.05 | 0.05 | 0.05 |
| VC0050 | 0.04  | 0.06 | 0.06 | 0.07 |
| VC0051 | 0.05  | 0.04 | 0.07 | 0.05 |
| VC0052 | 0.06  | 0.06 | 0.07 | 0.07 |
| VC0053 | 0.05  | 0.06 | 0.07 | 0.05 |
| VC0054 | 0.03  | 0.05 | 0.07 | 0.07 |
| VC0055 | 0.04  | 0.06 | 0.06 | 0.05 |
| VC0056 | 0.02  | 0.05 | 0.04 | 0.04 |
| VC0057 | 0.05  | 0.05 | 0.05 | 0.06 |
| VC0058 | 0.06  | 0.07 | 0.09 | 0.07 |
| VC0060 | 0.05  | 0.06 | 0.05 | 0.05 |
| VC0061 | 0.05  | 0.05 | 0.04 | 0.06 |
| VC0062 | 0.06  | 0.09 | 0.06 | 0.05 |
| VC0063 | 0.10  | 0.13 | 0.08 | 0.07 |
| VC0064 | 0.06  | 0.08 | 0.04 | 0.06 |
| VC0065 | 0.05  | 0.05 | 0.05 | 0.06 |
| VC0066 | 0.01  | 0.03 | 0.05 | 0.06 |
| VC0067 | 0.05  | 0.05 | 0.06 | 0.06 |
| VC0068 | 0.04  | 0.05 | 0.03 | 0.03 |
| VC0069 | 0.04  | 0.05 | 0.05 | 0.05 |
| VC0070 | 0.09  | 0.10 | 0.03 | 0.04 |
| VC0071 | 0.02  | 0.03 | 0.10 | 0.12 |
| VC0072 | 0.55  | 0.53 | 0.48 | 0.53 |
| VC0072 | 0.01  | 0.04 | 0.05 | 0.06 |
| VC0073 | 0.05  | 0.04 | 0.13 | 0.17 |
| VC0074 | 0.06  | 0.06 | 0.02 | 0.04 |
| VC0075 | 0.05  | 0.06 | 0.08 | 0.09 |
| VC0076 | 0.06  | 0.06 | 0.05 | 0.05 |
| VC0077 | 0.07  | 0.10 | 0.02 | 0.03 |
| VC0078 | 0.00  | 0.00 | 0.05 | 0.09 |
| VC0079 | 0.08  | 0.08 | 0.10 | 0.03 |
| VC0080 | 0.03  | 0.03 | 0.03 | 0.04 |
| VC0081 | 0.05  | 0.06 | 0.07 | 0.05 |

|        |       |      |      |       |
|--------|-------|------|------|-------|
| VC0082 | 0.00  | 0.02 | 0.01 | 0.02  |
| VC0083 | 0.07  | 0.07 | 0.04 | 0.03  |
| VC0084 | 0.04  | 0.03 | 0.06 | -0.01 |
| VC0085 | 0.04  | 0.04 | 0.04 | 0.04  |
| VC0086 | 0.05  | 0.06 | 0.01 | 0.02  |
| VC0087 | 0.04  | 0.02 | 0.05 | 0.06  |
| VC0088 | -0.02 | 0.01 | 0.05 | 0.04  |
| VC0089 | 0.03  | 0.02 | 0.04 | 0.05  |
| VC0090 | 0.04  | 0.03 | 0.05 | 0.05  |
| VC0091 | 0.02  | 0.02 | 0.06 | 0.08  |
| VC0092 | 0.07  | 0.08 | 0.03 | 0.03  |
| VC0093 | 0.05  | 0.06 | 0.06 | 0.06  |
| VC0094 | 0.06  | 0.06 | 0.05 | 0.04  |
| VC0095 | 0.04  | 0.04 | 0.05 | 0.04  |
| VC0096 | 0.09  | 0.06 | 0.06 | 0.07  |
| VC0097 | 0.04  | 0.03 | 0.13 | 0.10  |
| VC0098 | 0.13  | 0.14 | 0.05 | 0.05  |
| VC0099 | 0.05  | 0.05 | 0.02 | 0.02  |
| VC0100 | 0.10  | 0.11 | 0.06 | 0.06  |
| VC0101 | 0.09  | 0.07 | 0.04 | 0.04  |
| VC0102 | 0.04  | 0.07 | 0.06 | 0.07  |
| VC0103 | 0.07  | 0.08 | 0.06 | 0.04  |
| VC0104 | 0.05  | 0.05 | 0.04 | 0.03  |
| VC0105 | 0.05  | 0.04 | 0.05 | 0.02  |
| VC0106 | 0.06  | 0.07 | 0.09 | 0.08  |
| VC0107 | 0.04  | 0.05 | 0.05 | 0.05  |
| VC0108 | 0.02  | 0.03 | 0.03 | 0.02  |
| VC0109 | 0.02  | 0.06 | 0.04 | 0.05  |
| VC0110 | 0.05  | 0.08 | 0.04 | 0.04  |
| VC0111 | 0.09  | 0.10 | 0.06 | 0.06  |
| VC0112 | 0.09  | 0.11 | 0.07 | 0.07  |
| VC0113 | 0.12  | 0.10 | 0.09 | 0.09  |
| VC0114 | 0.09  | 0.08 | 0.07 | 0.06  |
| VC0115 | 0.12  | 0.12 | 0.07 | 0.08  |
| VC0116 | 0.04  | 0.05 | 0.02 | 0.03  |
| VC0117 | 0.13  | 0.14 | 0.06 | 0.06  |
| VC0118 | 0.05  | 0.05 | 0.03 | 0.04  |
| VC0119 | 0.09  | 0.09 | 0.02 | 0.03  |
| VC0120 | 0.06  | 0.08 | 0.00 | 0.04  |
| VC0121 | 0.08  | 0.07 | 0.04 | 0.04  |
| VC0123 | 0.07  | 0.07 | 0.04 | 0.03  |
| VC0124 | 0.09  | 0.11 | 0.05 | 0.04  |
| VC0125 | 0.07  | 0.08 | 0.05 | 0.06  |

|        |      |      |       |       |
|--------|------|------|-------|-------|
| VC0126 | 0.09 | 0.08 | 0.03  | 0.03  |
| VC0127 | 0.09 | 0.10 | 0.04  | 0.04  |
| VC0128 | 0.09 | 0.09 | 0.04  | 0.04  |
| VC0129 | 0.07 | 0.07 | 0.06  | 0.04  |
| VC0130 | 0.00 | 0.01 | 0.01  | 0.02  |
| VC0131 | 0.11 | 0.12 | 0.07  | 0.06  |
| VC0132 | 0.09 | 0.08 | 0.06  | 0.06  |
| VC0133 | 0.05 | 0.05 | 0.04  | 0.04  |
| VC0133 | 0.06 | 0.06 | 0.04  | 0.05  |
| VC0134 | 0.06 | 0.05 | 0.04  | 0.04  |
| VC0135 | 0.05 | 0.06 | 0.07  | 0.06  |
| VC0136 | 0.06 | 0.06 | 0.03  | 0.04  |
| VC0137 | 0.01 | 0.03 | 0.00  | -0.01 |
| VC0138 | 0.05 | 0.06 | 0.06  | 0.07  |
| VC0139 | 0.11 | 0.11 | 0.07  | 0.07  |
| VC0140 | 0.11 | 0.12 | 0.06  | 0.06  |
| VC0141 | 0.03 | 0.06 | 0.04  | 0.08  |
| VC0142 | 0.07 | 0.05 | 0.03  | 0.03  |
| VC0143 | 0.01 | 0.02 | 0.00  | 0.01  |
| VC0144 | 0.08 | 0.08 | 0.07  | 0.07  |
| VC0145 | 0.02 | 0.04 | 0.05  | 0.05  |
| VC0146 | 0.03 | 0.03 | 0.02  | 0.03  |
| VC0147 | 0.05 | 0.06 | 0.03  | 0.04  |
| VC0148 | 0.01 | 0.02 | 0.00  | 0.00  |
| VC0149 | 0.02 | 0.03 | 0.01  | 0.01  |
| VC0150 | 0.08 | 0.06 | 0.05  | 0.07  |
| VC0151 | 0.02 | 0.02 | 0.01  | 0.01  |
| VC0152 | 0.07 | 0.06 | 0.04  | 0.04  |
| VC0153 | 0.02 | 0.02 | 0.01  | 0.01  |
| VC0154 | 0.02 | 0.00 | 0.00  | 0.00  |
| VC0156 | 0.04 | 0.05 | -0.02 | -0.02 |
| VC0157 | 0.03 | 0.04 | 0.05  | 0.03  |
| VC0158 | 0.06 | 0.10 | 0.06  | 0.06  |
| VC0159 | 0.02 | 0.03 | 0.01  | 0.02  |
| VC0160 | 0.07 | 0.07 | 0.04  | 0.05  |
| VC0161 | 0.03 | 0.03 | 0.04  | 0.03  |
| VC0162 | 0.09 | 0.09 | 0.05  | 0.08  |
| VC0163 | 0.05 | 0.13 | 0.06  | 0.06  |
| VC0164 | 0.05 | 0.06 | 0.04  | 0.03  |
| VC0165 | 0.02 | 0.03 | 0.00  | 0.00  |
| VC0166 | 0.02 | 0.02 | 0.01  | 0.02  |
| VC0167 | 0.03 | 0.05 | 0.03  | 0.03  |
| VC0168 | 0.05 | 0.04 | 0.07  | 0.07  |

|        |      |      |       |      |
|--------|------|------|-------|------|
| VC0169 | 0.07 | 0.07 | 0.02  | 0.03 |
| VC0170 | 0.08 | 0.10 | 0.04  | 0.08 |
| VC0171 | 0.03 | 0.05 | 0.03  | 0.03 |
| VC0172 | 0.09 | 0.08 | 0.02  | 0.03 |
| VC0173 | 0.04 | 0.04 | 0.00  | 0.02 |
| VC0174 | 0.02 | 0.02 | 0.01  | 0.02 |
| VC0175 | 0.04 | 0.05 | 0.04  | 0.04 |
| VC0176 | 0.11 | 0.08 | 0.03  | 0.05 |
| VC0177 | 0.03 | 0.04 | 0.02  | 0.02 |
| VC0178 | 0.03 | 0.03 | 0.01  | 0.02 |
| VC0179 | 0.04 | 0.03 | 0.04  | 0.04 |
| VC0180 | 0.07 | 0.08 | 0.07  | 0.05 |
| VC0181 | 0.01 | 0.02 | 0.01  | 0.02 |
| VC0182 | 0.01 | 0.02 | 0.02  | 0.03 |
| VC0183 | 0.03 | 0.03 | 0.05  | 0.05 |
| VC0184 | 0.08 | 0.09 | 0.05  | 0.05 |
| VC0185 | 0.02 | 0.02 | 0.01  | 0.01 |
| VC0186 | 0.07 | 0.07 | 0.05  | 0.06 |
| VC0187 | 0.01 | 0.02 | 0.01  | 0.02 |
| VC0188 | 0.06 | 0.07 | 0.03  | 0.03 |
| VC0189 | 0.05 | 0.05 | 0.03  | 0.03 |
| VC0189 | 0.04 | 0.05 | 0.03  | 0.04 |
| VC0190 | 0.01 | 0.02 | 0.08  | 0.08 |
| VC0191 | 0.06 | 0.06 | 0.04  | 0.04 |
| VC0192 | 0.01 | 0.02 | 0.01  | 0.01 |
| VC0193 | 0.08 | 0.09 | 0.05  | 0.08 |
| VC0194 | 0.09 | 0.08 | 0.08  | 0.12 |
| VC0195 | 0.04 | 0.05 | 0.01  | 0.01 |
| VC0196 | 0.08 | 0.06 | 0.08  | 0.07 |
| VC0197 | 0.05 | 0.05 | 0.01  | 0.01 |
| VC0198 | 0.01 | 0.02 | -0.01 | 0.00 |
| VC0199 | 0.09 | 0.09 | 0.14  | 0.10 |
| VC0200 | 0.01 | 0.01 | 0.02  | 0.02 |
| VC0201 | 0.02 | 0.06 | 0.06  | 0.05 |
| VC0202 | 0.08 | 0.10 | 0.04  | 0.03 |
| VC0203 | 0.01 | 0.03 | 0.04  | 0.04 |
| VC0204 | 0.00 | 0.00 | 0.10  | 0.06 |
| VC0205 | 0.08 | 0.07 | 0.06  | 0.03 |
| VC0206 | 0.01 | 0.02 | 0.16  | 0.13 |
| VC0207 | 0.02 | 0.04 | 0.03  | 0.03 |
| VC0208 | 0.01 | 0.03 | 0.03  | 0.02 |
| VC0209 | 0.05 | 0.05 | 0.06  | 0.04 |
| VC0210 | 0.00 | 0.02 | 0.11  | 0.10 |

|        |       |      |      |      |
|--------|-------|------|------|------|
| VC0211 | 0.06  | 0.06 | 0.04 | 0.04 |
| VC0212 | 0.01  | 0.00 | 0.12 | 0.09 |
| VC0213 | 0.00  | 0.00 | 0.12 | 0.08 |
| VC0214 | 0.06  | 0.05 | 0.07 | 0.02 |
| VC0215 | 0.03  | 0.03 | 0.03 | 0.03 |
| VC0216 | 0.04  | 0.06 | 0.04 | 0.02 |
| VC0217 | 0.03  | 0.06 | 0.04 | 0.04 |
| VC0218 | 0.06  | 0.04 | 0.04 | 0.03 |
| VC0219 | 0.04  | 0.05 | 0.06 | 0.04 |
| VC0220 | 0.05  | 0.05 | 0.02 | 0.02 |
| VC0221 | 0.00  | 0.00 | 0.07 | 0.05 |
| VC0222 | 0.06  | 0.06 | 0.06 | 0.04 |
| VC0223 | 0.02  | 0.03 | 0.08 | 0.07 |
| VC0224 | 0.01  | 0.02 | 0.09 | 0.06 |
| VC0225 | 0.04  | 0.07 | 0.04 | 0.04 |
| VC0226 | 0.07  | 0.10 | 0.04 | 0.04 |
| VC0227 | 0.01  | 0.00 | 0.04 | 0.04 |
| VC0228 | 0.06  | 0.06 | 0.07 | 0.05 |
| VC0229 | -0.01 | 0.00 | 0.08 | 0.06 |
| VC0230 | 0.02  | 0.01 | 0.02 | 0.03 |
| VC0231 | 0.06  | 0.06 | 0.06 | 0.06 |
| VC0232 | 0.04  | 0.05 | 0.06 | 0.02 |
| VC0233 | 0.00  | 0.03 | 0.07 | 0.06 |
| VC0234 | 0.00  | 0.01 | 0.05 | 0.04 |
| VC0235 | 0.05  | 0.10 | 0.04 | 0.04 |
| VC0236 | 0.00  | 0.00 | 0.08 | 0.05 |
| VC0237 | -0.01 | 0.01 | 0.12 | 0.11 |
| VC0238 | 0.01  | 0.01 | 0.09 | 0.06 |
| VC0239 | 0.01  | 0.04 | 0.06 | 0.05 |
| VC0240 | 0.10  | 0.08 | 0.02 | 0.02 |
| VC0241 | -0.01 | 0.00 | 0.12 | 0.11 |
| VC0242 | 0.00  | 0.01 | 0.15 | 0.13 |
| VC0243 | 0.02  | 0.04 | 0.03 | 0.03 |
| VC0244 | 0.00  | 0.02 | 0.09 | 0.05 |
| VC0245 | 0.01  | 0.03 | 0.04 | 0.04 |
| VC0246 | 0.04  | 0.05 | 0.03 | 0.03 |
| VC0247 | 0.02  | 0.02 | 0.07 | 0.06 |
| VC0248 | 0.06  | 0.06 | 0.06 | 0.02 |
| VC0249 | 0.01  | 0.02 | 0.05 | 0.04 |
| VC0250 | 0.00  | 0.03 | 0.02 | 0.01 |
| VC0251 | 0.03  | 0.04 | 0.05 | 0.05 |
| VC0252 | 0.01  | 0.01 | 0.17 | 0.17 |
| VC0253 | 0.06  | 0.06 | 0.03 | 0.04 |

|        |      |      |      |      |
|--------|------|------|------|------|
| VC0254 | 0.02 | 0.02 | 0.08 | 0.08 |
| VC0254 | 0.01 | 0.02 | 0.05 | 0.05 |
| VC0255 | 0.04 | 0.04 | 0.03 | 0.03 |
| VC0256 | 0.01 | 0.01 | 0.09 | 0.07 |
| VC0257 | 0.02 | 0.02 | 0.05 | 0.05 |
| VC0258 | 0.01 | 0.00 | 0.02 | 0.03 |
| VC0259 | 0.00 | 0.01 | 0.05 | 0.04 |
| VC0260 | 0.04 | 0.06 | 0.07 | 0.06 |
| VC0261 | 0.04 | 0.03 | 0.06 | 0.05 |
| VC0262 | 0.00 | 0.02 | 0.03 | 0.02 |
| VC0263 | 0.05 | 0.07 | 0.02 | 0.05 |
| VC0264 | 0.09 | 0.08 | 0.05 | 0.07 |
| VC0265 | 0.04 | 0.03 | 0.05 | 0.04 |
| VC0266 | 0.03 | 0.06 | 0.04 | 0.07 |
| VC0267 | 0.03 | 0.05 | 0.11 | 0.09 |
| VC0268 | 0.07 | 0.04 | 0.02 | 0.07 |
| VC0269 | 0.03 | 0.03 | 0.08 | 0.06 |
| VC0270 | 0.08 | 0.04 | 0.08 | 0.09 |
| VC0271 | 0.01 | 0.04 | 0.08 | 0.07 |
| VC0272 | 0.09 | 0.07 | 0.07 | 0.03 |
| VC0273 | 0.04 | 0.04 | 0.06 | 0.06 |
| VC0274 | 0.05 | 0.04 | 0.07 | 0.09 |
| VC0275 | 0.03 | 0.03 | 0.06 | 0.06 |
| VC0276 | 0.08 | 0.09 | 0.06 | 0.06 |
| VC0277 | 0.11 | 0.11 | 0.07 | 0.06 |
| VC0278 | 0.07 | 0.04 | 0.04 | 0.03 |
| VC0279 | 0.05 | 0.04 | 0.04 | 0.05 |
| VC0280 | 0.03 | 0.03 | 0.05 | 0.04 |
| VC0281 | 0.05 | 0.02 | 0.03 | 0.03 |
| VC0282 | 0.06 | 0.06 | 0.08 | 0.06 |
| VC0283 | 0.06 | 0.07 | 0.06 | 0.06 |
| VC0284 | 0.05 | 0.04 | 0.05 | 0.06 |
| VC0285 | 0.06 | 0.06 | 0.06 | 0.09 |
| VC0286 | 0.03 | 0.03 | 0.01 | 0.03 |
| VC0286 | 0.00 | 0.00 | 0.04 | 0.05 |
| VC0287 | 0.02 | 0.02 | 0.04 | 0.04 |
| VC0287 | 0.01 | 0.05 | 0.05 | 0.05 |
| VC0288 | 0.06 | 0.07 | 0.04 | 0.07 |
| VC0289 | 0.07 | 0.07 | 0.10 | 0.09 |
| VC0290 | 0.07 | 0.07 | 0.08 | 0.13 |
| VC0291 | 0.07 | 0.05 | 0.09 | 0.07 |
| VC0292 | 0.07 | 0.06 | 0.02 | 0.03 |
| VC0293 | 0.06 | 0.06 | 0.03 | 0.04 |

|        |       |      |      |      |
|--------|-------|------|------|------|
| VC0294 | 0.08  | 0.10 | 0.10 | 0.11 |
| VC0295 | 0.11  | 0.09 | 0.08 | 0.07 |
| VC0297 | 0.10  | 0.08 | 0.07 | 0.04 |
| VC0298 | -0.01 | 0.03 | 0.07 | 0.06 |
| VC0299 | 0.05  | 0.08 | 0.03 | 0.04 |
| VC0300 | 0.07  | 0.07 | 0.04 | 0.04 |
| VC0301 | 0.06  | 0.06 | 0.07 | 0.05 |
| VC0302 | 0.06  | 0.06 | 0.03 | 0.05 |
| VC0303 | 0.05  | 0.08 | 0.06 | 0.08 |
| VC0304 | 0.03  | 0.02 | 0.11 | 0.07 |
| VC0305 | 0.03  | 0.06 | 0.12 | 0.12 |
| VC0306 | 0.05  | 0.05 | 0.04 | 0.06 |
| VC0307 | 0.08  | 0.10 | 0.07 | 0.07 |
| VC0308 | 0.02  | 0.06 | 0.04 | 0.03 |
| VC0309 | 0.01  | 0.02 | 0.04 | 0.04 |
| VC0311 | 0.03  | 0.04 | 0.04 | 0.05 |
| VC0312 | 0.05  | 0.08 | 0.03 | 0.03 |
| VC0313 | 0.05  | 0.05 | 0.06 | 0.06 |
| VC0314 | 0.06  | 0.06 | 0.07 | 0.06 |
| VC0316 | 0.05  | 0.06 | 0.02 | 0.03 |
| VC0317 | 0.06  | 0.08 | 0.05 | 0.11 |
| VC0318 | 0.03  | 0.04 | 0.07 | 0.07 |
| VC0319 | 0.07  | 0.08 | 0.07 | 0.05 |
| VC0320 | 0.04  | 0.03 | 0.04 | 0.04 |
| VC0321 | 0.02  | 0.02 | 0.00 | 0.00 |
| VC0322 | 0.05  | 0.07 | 0.05 | 0.04 |
| VC0323 | 0.11  | 0.10 | 0.06 | 0.06 |
| VC0324 | 0.03  | 0.03 | 0.01 | 0.02 |
| VC0326 | 0.01  | 0.03 | 0.01 | 0.01 |
| VC0327 | 0.10  | 0.06 | 0.05 | 0.07 |
| VC0328 | 0.03  | 0.03 | 0.05 | 0.06 |
| VC0329 | 0.06  | 0.07 | 0.06 | 0.04 |
| VC0330 | 0.02  | 0.03 | 0.06 | 0.07 |
| VC0331 | 0.04  | 0.04 | 0.09 | 0.08 |
| VC0332 | 0.03  | 0.03 | 0.00 | 0.01 |
| VC0333 | 0.04  | 0.04 | 0.08 | 0.07 |
| VC0334 | 0.04  | 0.04 | 0.03 | 0.03 |
| VC0335 | 0.08  | 0.08 | 0.05 | 0.05 |
| VC0336 | 0.06  | 0.07 | 0.06 | 0.05 |
| VC0337 | 0.05  | 0.04 | 0.03 | 0.01 |
| VC0338 | 0.06  | 0.06 | 0.06 | 0.06 |
| VC0339 | 0.02  | 0.03 | 0.04 | 0.04 |
| VC0341 | 0.08  | 0.08 | 0.07 | 0.07 |



|        |      |      |      |      |
|--------|------|------|------|------|
| VC0342 | 0.06 | 0.06 | 0.03 | 0.04 |
| VC0343 | 0.06 | 0.07 | 0.03 | 0.02 |
| VC0344 | 0.06 | 0.05 | 0.01 | 0.02 |
| VC0345 | 0.08 | 0.10 | 0.06 | 0.05 |
| VC0346 | 0.04 | 0.06 | 0.05 | 0.05 |
| VC0347 | 0.12 | 0.10 | 0.10 | 0.09 |
| VC0348 | 0.02 | 0.02 | 0.06 | 0.07 |
| VC0349 | 0.04 | 0.03 | 0.09 | 0.08 |
| VC0350 | 0.05 | 0.05 | 0.03 | 0.03 |
| VC0351 | 0.02 | 0.03 | 0.05 | 0.05 |
| VC0352 | 0.06 | 0.04 | 0.03 | 0.03 |
| VC0353 | 0.03 | 0.02 | 0.05 | 0.06 |
| VC0354 | 0.01 | 0.01 | 0.02 | 0.02 |
| VC0355 | 0.06 | 0.07 | 0.06 | 0.06 |
| VC0356 | 0.07 | 0.07 | 0.06 | 0.05 |
| VC0357 | 0.05 | 0.05 | 0.09 | 0.07 |
| VC0358 | 0.04 | 0.05 | 0.04 | 0.07 |
| VC0359 | 0.07 | 0.08 | 0.06 | 0.07 |
| VC0360 | 0.06 | 0.06 | 0.10 | 0.10 |
| VC0361 | 0.06 | 0.07 | 0.04 | 0.05 |
| VC0362 | 0.01 | 0.02 | 0.00 | 0.00 |
| VC0363 | 0.07 | 0.07 | 0.03 | 0.04 |
| VC0364 | 0.07 | 0.06 | 0.03 | 0.03 |
| VC0365 | 0.06 | 0.05 | 0.06 | 0.05 |
| VC0366 | 0.07 | 0.10 | 0.03 | 0.04 |
| VC0367 | 0.03 | 0.04 | 0.08 | 0.05 |
| VC0368 | 0.06 | 0.07 | 0.03 | 0.03 |
| VC0369 | 0.04 | 0.04 | 0.05 | 0.04 |
| VC0370 | 0.03 | 0.04 | 0.04 | 0.04 |
| VC0371 | 0.03 | 0.04 | 0.01 | 0.01 |
| VC0372 | 0.03 | 0.02 | 0.04 | 0.04 |
| VC0373 | 0.06 | 0.07 | 0.04 | 0.03 |
| VC0374 | 0.05 | 0.06 | 0.11 | 0.10 |
| VC0375 | 0.05 | 0.05 | 0.07 | 0.06 |
| VC0376 | 0.07 | 0.07 | 0.03 | 0.04 |
| VC0377 | 0.02 | 0.02 | 0.04 | 0.04 |
| VC0378 | 0.06 | 0.07 | 0.06 | 0.04 |
| VC0379 | 0.04 | 0.03 | 0.03 | 0.03 |
| VC0380 | 0.09 | 0.09 | 0.05 | 0.03 |
| VC0381 | 0.02 | 0.02 | 0.04 | 0.04 |
| VC0382 | 0.05 | 0.06 | 0.06 | 0.06 |
| VC0383 | 0.08 | 0.06 | 0.10 | 0.04 |
| VC0384 | 0.04 | 0.04 | 0.07 | 0.03 |

|        |       |      |      |      |
|--------|-------|------|------|------|
| VC0385 | 0.01  | 0.03 | 0.05 | 0.05 |
| VC0386 | 0.07  | 0.08 | 0.07 | 0.05 |
| VC0387 | 0.07  | 0.08 | 0.08 | 0.07 |
| VC0388 | 0.07  | 0.06 | 0.06 | 0.08 |
| VC0389 | 0.02  | 0.02 | 0.03 | 0.05 |
| VC0390 | 0.04  | 0.06 | 0.02 | 0.02 |
| VC0391 | 0.03  | 0.03 | 0.04 | 0.07 |
| VC0392 | 0.03  | 0.05 | 0.06 | 0.07 |
| VC0393 | 0.05  | 0.05 | 0.08 | 0.07 |
| VC0394 | 0.08  | 0.06 | 0.12 | 0.09 |
| VC0395 | 0.03  | 0.04 | 0.05 | 0.08 |
| VC0396 | 0.06  | 0.09 | 0.08 | 0.08 |
| VC0397 | 0.03  | 0.04 | 0.06 | 0.06 |
| VC0399 | 0.00  | 0.01 | 0.04 | 0.03 |
| VC0400 | 0.05  | 0.06 | 0.07 | 0.06 |
| VC0401 | 0.01  | 0.02 | 0.07 | 0.06 |
| VC0402 | 0.01  | 0.00 | 0.01 | 0.02 |
| VC0403 | 0.03  | 0.01 | 0.03 | 0.02 |
| VC0404 | 0.02  | 0.02 | 0.10 | 0.08 |
| VC0405 | 0.17  | 0.19 | 0.23 | 0.24 |
| VC0406 | 0.00  | 0.02 | 0.05 | 0.04 |
| VC0407 | 0.03  | 0.02 | 0.05 | 0.05 |
| VC0408 | 0.00  | 0.00 | 0.05 | 0.05 |
| VC0409 | 0.05  | 0.05 | 0.01 | 0.03 |
| VC0410 | 0.01  | 0.01 | 0.04 | 0.04 |
| VC0411 | 0.01  | 0.01 | 0.01 | 0.03 |
| VC0412 | 0.00  | 0.00 | 0.03 | 0.03 |
| VC0413 | 0.05  | 0.04 | 0.04 | 0.04 |
| VC0414 | 0.24  | 0.23 | 0.04 | 0.04 |
| VC0415 | 0.01  | 0.02 | 0.01 | 0.01 |
| VC0416 | 0.00  | 0.02 | 0.07 | 0.08 |
| VC0417 | 0.06  | 0.05 | 0.03 | 0.02 |
| VC0418 | 0.02  | 0.01 | 0.03 | 0.04 |
| VC0419 | -0.01 | 0.00 | 0.06 | 0.07 |
| VC0420 | 0.04  | 0.03 | 0.01 | 0.04 |
| VC0420 | 0.01  | 0.02 | 0.04 | 0.05 |
| VC0421 | 0.02  | 0.04 | 0.05 | 0.07 |
| VC0422 | 0.00  | 0.00 | 0.05 | 0.04 |
| VC0423 | 0.02  | 0.03 | 0.06 | 0.03 |
| VC0424 | 0.04  | 0.04 | 0.08 | 0.06 |
| VC0425 | 0.01  | 0.01 | 0.04 | 0.05 |
| VC0426 | 0.01  | 0.03 | 0.04 | 0.04 |
| VC0427 | 0.05  | 0.06 | 0.03 | 0.03 |

|        |      |      |      |      |
|--------|------|------|------|------|
| VC0428 | 0.01 | 0.01 | 0.07 | 0.06 |
| VC0429 | 0.04 | 0.04 | 0.05 | 0.06 |
| VC0430 | 0.04 | 0.02 | 0.04 | 0.04 |
| VC0431 | 0.03 | 0.02 | 0.05 | 0.07 |
| VC0432 | 0.03 | 0.03 | 0.05 | 0.08 |
| VC0433 | 0.00 | 0.02 | 0.10 | 0.12 |
| VC0435 | 0.14 | 0.13 | 0.01 | 0.01 |
| VC0436 | 0.04 | 0.05 | 0.03 | 0.04 |
| VC0437 | 0.06 | 0.05 | 0.05 | 0.05 |
| VC0439 | 0.04 | 0.05 | 0.07 | 0.08 |
| VC0440 | 0.07 | 0.07 | 0.08 | 0.09 |
| VC0441 | 0.03 | 0.04 | 0.05 | 0.04 |
| VC0442 | 0.06 | 0.07 | 0.04 | 0.03 |
| VC0443 | 0.03 | 0.04 | 0.07 | 0.06 |
| VC0444 | 0.03 | 0.03 | 0.05 | 0.05 |
| VC0445 | 0.03 | 0.03 | 0.07 | 0.07 |
| VC0446 | 0.03 | 0.04 | 0.04 | 0.04 |
| VC0447 | 0.03 | 0.02 | 0.02 | 0.02 |
| VC0448 | 0.02 | 0.03 | 0.04 | 0.06 |
| VC0449 | 0.04 | 0.04 | 0.06 | 0.05 |
| VC0450 | 0.06 | 0.06 | 0.07 | 0.06 |
| VC0451 | 0.07 | 0.08 | 0.06 | 0.04 |
| VC0452 | 0.03 | 0.04 | 0.11 | 0.07 |
| VC0453 | 0.02 | 0.02 | 0.12 | 0.10 |
| VC0454 | 0.03 | 0.03 | 0.04 | 0.04 |
| VC0455 | 0.05 | 0.05 | 0.06 | 0.05 |
| VC0456 | 0.03 | 0.04 | 0.13 | 0.12 |
| VC0457 | 0.03 | 0.03 | 0.09 | 0.07 |
| VC0458 | 0.02 | 0.02 | 0.05 | 0.05 |
| VC0458 | 0.00 | 0.05 | 0.04 | 0.03 |
| VC0459 | 0.03 | 0.02 | 0.14 | 0.13 |
| VC0460 | 0.04 | 0.04 | 0.05 | 0.05 |
| VC0461 | 0.05 | 0.06 | 0.07 | 0.06 |
| VC0462 | 0.03 | 0.04 | 0.08 | 0.08 |
| VC0463 | 0.02 | 0.02 | 0.05 | 0.04 |
| VC0464 | 0.07 | 0.06 | 0.06 | 0.07 |
| VC0465 | 0.02 | 0.05 | 0.07 | 0.07 |
| VC0466 | 0.03 | 0.04 | 0.07 | 0.08 |
| VC0467 | 0.02 | 0.02 | 0.03 | 0.03 |
| VC0468 | 0.00 | 0.00 | 0.07 | 0.05 |
| VC0469 | 0.06 | 0.06 | 0.08 | 0.07 |
| VC0470 | 0.02 | 0.02 | 0.03 | 0.02 |
| VC0471 | 0.02 | 0.02 | 0.07 | 0.09 |

|        |      |      |      |      |
|--------|------|------|------|------|
| VC0472 | 0.02 | 0.02 | 0.01 | 0.01 |
| VC0473 | 0.04 | 0.05 | 0.03 | 0.04 |
| VC0474 | 0.02 | 0.02 | 0.06 | 0.06 |
| VC0475 | 0.01 | 0.00 | 0.02 | 0.02 |
| VC0476 | 0.01 | 0.03 | 0.03 | 0.08 |
| VC0477 | 0.02 | 0.03 | 0.04 | 0.03 |
| VC0477 | 0.01 | 0.02 | 0.03 | 0.04 |
| VC0478 | 0.02 | 0.04 | 0.05 | 0.06 |
| VC0479 | 0.03 | 0.04 | 0.04 | 0.03 |
| VC0480 | 0.00 | 0.01 | 0.01 | 0.02 |
| VC0481 | 0.04 | 0.04 | 0.03 | 0.02 |
| VC0482 | 0.05 | 0.05 | 0.05 | 0.05 |
| VC0483 | 0.02 | 0.02 | 0.04 | 0.09 |
| VC0484 | 0.04 | 0.03 | 0.05 | 0.05 |
| VC0485 | 0.02 | 0.01 | 0.05 | 0.06 |
| VC0486 | 0.05 | 0.07 | 0.07 | 0.06 |
| VC0487 | 0.09 | 0.12 | 0.03 | 0.05 |
| VC0488 | 0.01 | 0.03 | 0.05 | 0.07 |
| VC0489 | 0.06 | 0.07 | 0.02 | 0.03 |
| VC0490 | 0.03 | 0.02 | 0.05 | 0.05 |
| VC0491 | 0.05 | 0.05 | 0.03 | 0.03 |
| VC0492 | 0.02 | 0.02 | 0.04 | 0.05 |
| VC0492 | 0.01 | 0.01 | 0.04 | 0.04 |
| VC0493 | 0.04 | 0.05 | 0.04 | 0.05 |
| VC0494 | 0.02 | 0.02 | 0.08 | 0.08 |
| VC0495 | 0.02 | 0.02 | 0.06 | 0.05 |
| VC0496 | 0.02 | 0.03 | 0.05 | 0.05 |
| VC0497 | 0.04 | 0.05 | 0.04 | 0.05 |
| VC0498 | 0.07 | 0.06 | 0.05 | 0.05 |
| VC0499 | 0.03 | 0.04 | 0.07 | 0.09 |
| VC0500 | 0.04 | 0.06 | 0.04 | 0.05 |
| VC0501 | 0.03 | 0.04 | 0.06 | 0.06 |
| VC0502 | 0.03 | 0.03 | 0.09 | 0.04 |
| VC0503 | 0.02 | 0.02 | 0.02 | 0.02 |
| VC0504 | 0.02 | 0.06 | 0.03 | 0.05 |
| VC0505 | 0.06 | 0.06 | 0.06 | 0.06 |
| VC0506 | 0.08 | 0.08 | 0.06 | 0.04 |
| VC0507 | 0.07 | 0.08 | 0.01 | 0.03 |
| VC0508 | 0.05 | 0.06 | 0.09 | 0.08 |
| VC0509 | 0.05 | 0.06 | 0.08 | 0.07 |
| VC0510 | 0.00 | 0.01 | 0.07 | 0.04 |
| VC0511 | 0.05 | 0.05 | 0.05 | 0.04 |
| VC0512 | 0.04 | 0.05 | 0.08 | 0.05 |

|        |       |       |      |      |
|--------|-------|-------|------|------|
| VC0513 | 0.01  | 0.01  | 0.09 | 0.08 |
| VC0514 | 0.04  | 0.03  | 0.05 | 0.07 |
| VC0515 | 0.01  | 0.01  | 0.02 | 0.02 |
| VC0516 | 0.01  | 0.03  | 0.06 | 0.06 |
| VC0517 | 0.07  | 0.05  | 0.04 | 0.06 |
| VC0518 | 0.02  | 0.04  | 0.04 | 0.05 |
| VC0519 | 0.05  | 0.06  | 0.08 | 0.09 |
| VC0520 | 0.05  | 0.06  | 0.04 | 0.05 |
| VC0521 | 0.09  | 0.07  | 0.06 | 0.06 |
| VC0522 | 0.05  | 0.07  | 0.04 | 0.03 |
| VC0523 | -0.01 | 0.00  | 0.07 | 0.06 |
| VC0524 | 0.05  | 0.06  | 0.09 | 0.10 |
| VC0525 | 0.00  | 0.01  | 0.10 | 0.08 |
| VC0526 | 0.03  | 0.03  | 0.04 | 0.05 |
| VC0527 | 0.06  | 0.05  | 0.01 | 0.02 |
| VC0528 | -0.01 | -0.01 | 0.12 | 0.13 |
| VC0529 | 0.02  | 0.02  | 0.06 | 0.05 |
| VC0530 | 0.06  | 0.07  | 0.06 | 0.04 |
| VC0531 | 0.06  | 0.05  | 0.04 | 0.03 |
| VC0532 | 0.00  | 0.00  | 0.09 | 0.10 |
| VC0533 | 0.02  | 0.03  | 0.02 | 0.01 |
| VC0534 | 0.00  | 0.00  | 0.08 | 0.07 |
| VC0535 | 0.05  | 0.05  | 0.07 | 0.05 |
| VC0536 | 0.05  | 0.05  | 0.06 | 0.07 |
| VC0537 | -0.01 | -0.01 | 0.07 | 0.06 |
| VC0538 | 0.06  | 0.05  | 0.06 | 0.05 |
| VC0539 | -0.01 | 0.03  | 0.04 | 0.04 |
| VC0540 | 0.03  | 0.03  | 0.03 | 0.03 |
| VC0541 | 0.02  | 0.02  | 0.03 | 0.06 |
| VC0542 | 0.06  | 0.05  | 0.07 | 0.06 |
| VC0543 | 0.04  | 0.03  | 0.07 | 0.07 |
| VC0544 | 0.04  | 0.04  | 0.06 | 0.05 |
| VC0545 | 0.10  | 0.10  | 0.06 | 0.06 |
| VC0546 | 0.05  | 0.06  | 0.03 | 0.02 |
| VC0547 | 0.03  | 0.04  | 0.05 | 0.05 |
| VC0548 | 0.11  | 0.06  | 0.06 | 0.03 |
| VC0549 | 0.06  | 0.06  | 0.02 | 0.02 |
| VC0550 | 0.02  | 0.01  | 0.06 | 0.05 |
| VC0551 | 0.01  | 0.03  | 0.02 | 0.02 |
| VC0552 | 0.02  | 0.06  | 0.03 | 0.04 |
| VC0553 | 0.04  | 0.04  | 0.07 | 0.06 |
| VC0554 | 0.07  | 0.05  | 0.08 | 0.10 |
| VC0555 | 0.03  | 0.03  | 0.02 | 0.02 |

|        |      |      |      |      |
|--------|------|------|------|------|
| VC0556 | 0.04 | 0.05 | 0.07 | 0.05 |
| VC0557 | 0.04 | 0.04 | 0.06 | 0.08 |
| VC0558 | 0.03 | 0.02 | 0.04 | 0.18 |
| VC0559 | 0.00 | 0.01 | 0.03 | 0.03 |
| VC0560 | 0.07 | 0.05 | 0.07 | 0.07 |
| VC0561 | 0.03 | 0.03 | 0.02 | 0.03 |
| VC0562 | 0.04 | 0.03 | 0.06 | 0.07 |
| VC0563 | 0.03 | 0.04 | 0.07 | 0.07 |
| VC0564 | 0.04 | 0.10 | 0.04 | 0.05 |
| VC0565 | 0.02 | 0.05 | 0.04 | 0.04 |
| VC0567 | 0.05 | 0.04 | 0.05 | 0.22 |
| VC0568 | 0.05 | 0.05 | 0.05 | 0.04 |
| VC0569 | 0.07 | 0.07 | 0.04 | 0.03 |
| VC0570 | 0.06 | 0.07 | 0.07 | 0.03 |
| VC0571 | 0.10 | 0.10 | 0.05 | 0.04 |
| VC0572 | 0.08 | 0.08 | 0.01 | 0.02 |
| VC0573 | 0.02 | 0.02 | 0.03 | 0.04 |
| VC0574 | 0.08 | 0.07 | 0.03 | 0.03 |
| VC0575 | 0.00 | 0.02 | 0.05 | 0.16 |
| VC0576 | 0.08 | 0.06 | 0.04 | 0.02 |
| VC0577 | 0.00 | 0.01 | 0.01 | 0.05 |
| VC0578 | 0.03 | 0.03 | 0.01 | 0.01 |
| VC0579 | 0.05 | 0.06 | 0.03 | 0.04 |
| VC0580 | 0.07 | 0.07 | 0.08 | 0.05 |
| VC0581 | 0.04 | 0.04 | 0.05 | 0.04 |
| VC0582 | 0.02 | 0.03 | 0.03 | 0.04 |
| VC0583 | 0.09 | 0.07 | 0.02 | 0.03 |
| VC0584 | 0.05 | 0.06 | 0.05 | 0.04 |
| VC0585 | 0.07 | 0.06 | 0.05 | 0.06 |
| VC0586 | 0.07 | 0.06 | 0.01 | 0.02 |
| VC0587 | 0.04 | 0.04 | 0.03 | 0.07 |
| VC0588 | 0.07 | 0.06 | 0.04 | 0.05 |
| VC0589 | 0.04 | 0.04 | 0.04 | 0.07 |
| VC0590 | 0.04 | 0.05 | 0.03 | 0.04 |
| VC0591 | 0.03 | 0.04 | 0.03 | 0.07 |
| VC0592 | 0.01 | 0.01 | 0.08 | 0.05 |
| VC0593 | 0.03 | 0.05 | 0.08 | 0.08 |
| VC0596 | 0.07 | 0.07 | 0.08 | 0.06 |
| VC0597 | 0.03 | 0.04 | 0.05 | 0.06 |
| VC0598 | 0.04 | 0.04 | 0.03 | 0.04 |
| VC0599 | 0.07 | 0.06 | 0.04 | 0.05 |
| VC0600 | 0.06 | 0.08 | 0.03 | 0.03 |
| VC0601 | 0.01 | 0.01 | 0.05 | 0.04 |

|        |       |      |      |      |
|--------|-------|------|------|------|
| VC0602 | 0.01  | 0.02 | 0.04 | 0.04 |
| VC0603 | 0.02  | 0.02 | 0.04 | 0.02 |
| VC0604 | 0.03  | 0.04 | 0.05 | 0.06 |
| VC0605 | 0.09  | 0.08 | 0.05 | 0.07 |
| VC0606 | 0.07  | 0.07 | 0.05 | 0.04 |
| VC0607 | 0.03  | 0.04 | 0.00 | 0.04 |
| VC0607 | 0.01  | 0.00 | 0.07 | 0.07 |
| VC0609 | 0.02  | 0.04 | 0.02 | 0.02 |
| VC0610 | 0.02  | 0.02 | 0.04 | 0.04 |
| VC0611 | 0.02  | 0.03 | 0.02 | 0.05 |
| VC0611 | 0.01  | 0.02 | 0.05 | 0.05 |
| VC0612 | 0.00  | 0.01 | 0.03 | 0.04 |
| VC0613 | 0.05  | 0.07 | 0.03 | 0.06 |
| VC0614 | 0.04  | 0.03 | 0.12 | 0.12 |
| VC0615 | 0.02  | 0.02 | 0.04 | 0.06 |
| VC0615 | -0.01 | 0.07 | 0.06 | 0.05 |
| VC0616 | 0.02  | 0.01 | 0.04 | 0.06 |
| VC0617 | 0.00  | 0.03 | 0.04 | 0.05 |
| VC0619 | 0.03  | 0.04 | 0.06 | 0.04 |
| VC0620 | 0.02  | 0.03 | 0.02 | 0.04 |
| VC0620 | 0.01  | 0.04 | 0.03 | 0.04 |
| VC0621 | 0.07  | 0.08 | 0.06 | 0.05 |
| VC0622 | 0.02  | 0.03 | 0.04 | 0.04 |
| VC0623 | 0.03  | 0.03 | 0.05 | 0.04 |
| VC0624 | 0.06  | 0.05 | 0.10 | 0.10 |
| VC0625 | 0.04  | 0.07 | 0.05 | 0.05 |
| VC0626 | 0.08  | 0.06 | 0.07 | 0.06 |
| VC0627 | 0.05  | 0.06 | 0.05 | 0.05 |
| VC0628 | 0.05  | 0.09 | 0.05 | 0.05 |
| VC0629 | 0.02  | 0.04 | 0.04 | 0.04 |
| VC0630 | 0.08  | 0.06 | 0.07 | 0.06 |
| VC0631 | 0.07  | 0.05 | 0.11 | 0.08 |
| VC0632 | 0.03  | 0.03 | 0.05 | 0.05 |
| VC0633 | 0.06  | 0.05 | 0.09 | 0.06 |
| VC0634 | 0.07  | 0.16 | 0.08 | 0.10 |
| VC0635 | 0.06  | 0.05 | 0.12 | 0.11 |
| VC0636 | 0.06  | 0.07 | 0.09 | 0.08 |
| VC0637 | 0.10  | 0.08 | 0.06 | 0.09 |
| VC0638 | 0.03  | 0.04 | 0.08 | 0.04 |
| VC0639 | 0.06  | 0.06 | 0.08 | 0.09 |
| VC0640 | 0.06  | 0.05 | 0.09 | 0.06 |
| VC0641 | 0.08  | 0.09 | 0.05 | 0.05 |
| VC0642 | 0.04  | 0.05 | 0.01 | 0.01 |

|        |       |       |       |       |
|--------|-------|-------|-------|-------|
| VC0643 | 0.10  | 0.10  | 0.04  | 0.06  |
| VC0644 | 0.01  | 0.02  | 0.01  | 0.02  |
| VC0645 | 0.08  | 0.06  | 0.16  | 0.20  |
| VC0646 | 0.08  | 0.06  | 0.03  | 0.04  |
| VC0647 | 0.08  | 0.08  | 0.05  | 0.06  |
| VC0648 | 0.04  | 0.04  | 0.08  | 0.07  |
| VC0649 | 0.05  | 0.04  | 0.06  | 0.05  |
| VC0650 | 0.04  | 0.05  | 0.06  | 0.06  |
| VC0651 | 0.05  | 0.04  | 0.08  | 0.07  |
| VC0652 | 0.07  | 0.06  | 0.07  | 0.07  |
| VC0653 | -0.02 | -0.01 | -0.01 | -0.01 |
| VC0654 | 0.04  | 0.06  | 0.07  | 0.06  |
| VC0655 | 0.03  | 0.03  | 0.01  | 0.02  |
| VC0656 | 0.03  | 0.03  | 0.07  | 0.05  |
| VC0657 | 0.06  | 0.06  | 0.06  | 0.05  |
| VC0658 | 0.60  | 0.64  | 0.58  | 0.54  |
| VC0659 | 0.06  | 0.05  | 0.05  | 0.06  |
| VC0660 | 0.04  | 0.05  | 0.03  | 0.03  |
| VC0661 | 0.07  | 0.07  | 0.14  | 0.13  |
| VC0662 | 0.04  | 0.05  | 0.12  | 0.15  |
| VC0663 | 0.07  | 0.06  | 0.09  | 0.10  |
| VC0664 | 0.04  | 0.03  | 0.06  | 0.06  |
| VC0665 | 0.12  | 0.13  | 0.15  | 0.13  |
| VC0666 | 0.04  | 0.04  | 0.07  | 0.09  |
| VC0667 | 0.03  | 0.03  | 0.03  | 0.04  |
| VC0668 | 0.06  | 0.06  | 0.08  | 0.08  |
| VC0669 | 0.06  | 0.06  | 0.05  | 0.04  |
| VC0670 | 0.08  | 0.08  | 0.01  | 0.03  |
| VC0671 | 0.04  | 0.05  | 0.05  | 0.05  |
| VC0672 | 0.02  | 0.02  | 0.03  | 0.04  |
| VC0673 | 0.04  | 0.04  | 0.06  | 0.07  |
| VC0674 | 0.05  | 0.05  | 0.09  | 0.09  |
| VC0675 | 0.01  | 0.01  | 0.00  | 0.01  |
| VC0676 | 0.08  | 0.09  | 0.05  | 0.08  |
| VC0677 | 0.06  | 0.06  | 0.09  | 0.08  |
| VC0678 | 0.02  | 0.04  | 0.07  | 0.07  |
| VC0679 | 0.03  | 0.06  | 0.05  | 0.04  |
| VC0680 | 0.04  | 0.03  | 0.06  | 0.05  |
| VC0681 | 0.01  | 0.01  | 0.00  | 0.01  |
| VC0682 | 0.11  | 0.14  | 0.03  | 0.08  |
| VC0683 | 0.05  | 0.04  | 0.08  | 0.07  |
| VC0684 | 0.04  | 0.04  | 0.10  | 0.09  |
| VC0685 | 0.04  | 0.05  | 0.09  | 0.07  |



|        |       |      |      |      |
|--------|-------|------|------|------|
| VC0686 | 0.07  | 0.09 | 0.05 | 0.06 |
| VC0687 | 0.04  | 0.05 | 0.05 | 0.06 |
| VC0688 | 0.05  | 0.04 | 0.06 | 0.06 |
| VC0689 | 0.08  | 0.07 | 0.04 | 0.03 |
| VC0690 | 0.08  | 0.07 | 0.13 | 0.08 |
| VC0691 | 0.05  | 0.06 | 0.08 | 0.07 |
| VC0692 | 0.03  | 0.07 | 0.13 | 0.09 |
| VC0693 | 0.09  | 0.08 | 0.04 | 0.04 |
| VC0694 | 0.05  | 0.09 | 0.03 | 0.05 |
| VC0695 | 0.06  | 0.06 | 0.12 | 0.09 |
| VC0696 | 0.07  | 0.05 | 0.16 | 0.14 |
| VC0697 | 0.04  | 0.04 | 0.07 | 0.06 |
| VC0698 | 0.07  | 0.09 | 0.03 | 0.09 |
| VC0699 | 0.09  | 0.14 | 0.09 | 0.07 |
| VC0700 | 0.06  | 0.05 | 0.03 | 0.05 |
| VC0701 | 0.08  | 0.07 | 0.10 | 0.11 |
| VC0702 | 0.03  | 0.04 | 0.02 | 0.03 |
| VC0703 | 0.07  | 0.07 | 0.15 | 0.14 |
| VC0703 | 0.00  | 0.04 | 0.04 | 0.03 |
| VC0704 | 0.02  | 0.02 | 0.05 | 0.05 |
| VC0705 | 0.04  | 0.04 | 0.05 | 0.05 |
| VC0706 | 0.03  | 0.04 | 0.04 | 0.04 |
| VC0707 | 0.06  | 0.07 | 0.03 | 0.03 |
| VC0708 | 0.04  | 0.03 | 0.07 | 0.05 |
| VC0709 | 0.07  | 0.06 | 0.05 | 0.06 |
| VC0710 | 0.05  | 0.04 | 0.08 | 0.06 |
| VC0711 | 0.05  | 0.07 | 0.03 | 0.03 |
| VC0712 | 0.05  | 0.06 | 0.06 | 0.06 |
| VC0713 | 0.03  | 0.03 | 0.07 | 0.05 |
| VC0714 | 0.02  | 0.00 | 0.00 | 0.02 |
| VC0715 | 0.06  | 0.07 | 0.04 | 0.06 |
| VC0716 | 0.02  | 0.02 | 0.00 | 0.01 |
| VC0717 | 0.04  | 0.04 | 0.02 | 0.02 |
| VC0718 | 0.04  | 0.05 | 0.06 | 0.06 |
| VC0719 | 0.09  | 0.08 | 0.03 | 0.05 |
| VC0720 | 0.02  | 0.02 | 0.01 | 0.02 |
| VC0721 | 0.02  | 0.02 | 0.04 | 0.01 |
| VC0722 | 0.07  | 0.05 | 0.05 | 0.04 |
| VC0723 | 0.03  | 0.02 | 0.06 | 0.06 |
| VC0724 | 0.01  | 0.01 | 0.07 | 0.07 |
| VC0725 | -0.03 | 0.01 | 0.09 | 0.07 |
| VC0726 | 0.08  | 0.08 | 0.06 | 0.06 |
| VC0727 | 0.05  | 0.07 | 0.06 | 0.06 |

|        |       |      |      |      |
|--------|-------|------|------|------|
| VC0728 | 0.02  | 0.03 | 0.04 | 0.04 |
| VC0729 | 0.07  | 0.07 | 0.04 | 0.04 |
| VC0729 | 0.06  | 0.06 | 0.04 | 0.04 |
| VC0730 | 0.13  | 0.10 | 0.06 | 0.06 |
| VC0731 | 0.17  | 0.14 | 0.02 | 0.04 |
| VC0732 | 0.09  | 0.08 | 0.04 | 0.05 |
| VC0733 | 0.05  | 0.05 | 0.03 | 0.03 |
| VC0734 | 0.00  | 0.02 | 0.06 | 0.04 |
| VC0735 | 0.06  | 0.08 | 0.07 | 0.08 |
| VC0736 | 0.17  | 0.17 | 0.04 | 0.02 |
| VC0737 | 0.08  | 0.09 | 0.05 | 0.06 |
| VC0738 | 0.06  | 0.08 | 0.08 | 0.08 |
| VC0738 | 0.07  | 0.09 | 0.06 | 0.06 |
| VC0739 | 0.15  | 0.13 | 0.03 | 0.03 |
| VC0740 | 0.05  | 0.05 | 0.06 | 0.06 |
| VC0741 | 0.03  | 0.05 | 0.05 | 0.05 |
| VC0742 | 0.11  | 0.10 | 0.07 | 0.06 |
| VC0743 | 0.04  | 0.06 | 0.03 | 0.04 |
| VC0744 | 0.03  | 0.03 | 0.01 | 0.02 |
| VC0745 | 0.15  | 0.11 | 0.01 | 0.00 |
| VC0746 | 0.13  | 0.12 | 0.02 | 0.01 |
| VC0747 | 0.09  | 0.08 | 0.01 | 0.02 |
| VC0748 | 0.15  | 0.14 | 0.02 | 0.01 |
| VC0749 | 0.10  | 0.09 | 0.00 | 0.01 |
| VC0750 | 0.08  | 0.05 | 0.06 | 0.06 |
| VC0751 | 0.07  | 0.07 | 0.03 | 0.04 |
| VC0752 | 0.07  | 0.08 | 0.05 | 0.05 |
| VC0753 | 0.10  | 0.10 | 0.01 | 0.04 |
| VC0754 | 0.09  | 0.08 | 0.05 | 0.05 |
| VC0755 | 0.11  | 0.09 | 0.04 | 0.04 |
| VC0756 | 0.05  | 0.05 | 0.02 | 0.03 |
| VC0757 | 0.14  | 0.15 | 0.03 | 0.03 |
| VC0758 | 0.07  | 0.04 | 0.03 | 0.02 |
| VC0759 | 0.09  | 0.07 | 0.00 | 0.00 |
| VC0760 | 0.04  | 0.05 | 0.09 | 0.09 |
| VC0761 | 0.12  | 0.09 | 0.01 | 0.00 |
| VC0762 | 0.10  | 0.07 | 0.05 | 0.05 |
| VC0763 | 0.00  | 0.02 | 0.01 | 0.01 |
| VC0764 | 0.02  | 0.03 | 0.04 | 0.05 |
| VC0765 | 0.13  | 0.11 | 0.03 | 0.01 |
| VC0766 | 0.05  | 0.06 | 0.08 | 0.06 |
| VC0767 | -0.01 | 0.02 | 0.05 | 0.05 |
| VC0768 | 0.01  | 0.01 | 0.07 | 0.05 |

|         |       |       |      |       |
|---------|-------|-------|------|-------|
| VC0769  | 0.01  | 0.02  | 0.04 | 0.04  |
| VC0770  | 0.07  | 0.10  | 0.01 | 0.00  |
| VC0771  | 0.02  | 0.02  | 0.06 | 0.01  |
| VC0772  | -0.03 | -0.03 | 0.07 | 0.06  |
| VC0773  | 0.06  | 0.06  | 0.07 | 0.06  |
| VC0774  | 0.06  | 0.08  | 0.03 | 0.04  |
| VC0775  | 0.13  | 0.14  | 0.00 | 0.01  |
| VC0776  | 0.02  | 0.03  | 0.07 | 0.02  |
| VC0777  | 0.11  | 0.10  | 0.01 | 0.02  |
| VC0778  | 0.12  | 0.11  | 0.02 | -0.01 |
| VC0779  | 0.03  | 0.04  | 0.05 | 0.05  |
| VC0780  | 0.13  | 0.11  | 0.00 | 0.01  |
| VC0781  | 0.12  | 0.11  | 0.00 | 0.01  |
| VC0782  | 0.05  | 0.05  | 0.10 | 0.07  |
| VC0783  | 0.06  | 0.05  | 0.07 | 0.06  |
| VC0784  | 0.10  | 0.11  | 0.03 | 0.03  |
| VC0785  | 0.05  | 0.05  | 0.04 | 0.05  |
| VC0786  | 0.06  | 0.06  | 0.06 | 0.09  |
| VC0787  | 0.03  | 0.04  | 0.06 | 0.06  |
| VC0788  | 0.05  | 0.04  | 0.04 | 0.04  |
| VC0788  | 0.02  | 0.01  | 0.03 | 0.04  |
| VC0789  | 0.06  | 0.05  | 0.08 | 0.05  |
| VC0790  | 0.05  | 0.03  | 0.09 | 0.07  |
| VC0791  | 0.08  | 0.09  | 0.04 | 0.04  |
| VC0792  | 0.02  | 0.03  | 0.08 | 0.08  |
| VC0793  | 0.01  | 0.14  | 0.02 | 0.03  |
| VC0793m | 0.04  | 0.04  | 0.06 | 0.06  |
| VC0794  | 0.10  | 0.11  | 0.01 | 0.02  |
| VC0795  | 0.03  | 0.05  | 0.04 | 0.05  |
| VC0796  | 0.05  | 0.06  | 0.06 | 0.07  |
| VC0797  | 0.07  | 0.06  | 0.07 | 0.06  |
| VC0798  | 0.05  | 0.04  | 0.03 | 0.04  |
| VC0799  | 0.02  | 0.02  | 0.04 | 0.04  |
| VC0800  | 0.08  | 0.07  | 0.12 | 0.12  |
| VC0801  | 0.05  | 0.04  | 0.08 | 0.06  |
| VC0802  | 0.05  | 0.05  | 0.07 | 0.06  |
| VC0803  | 0.03  | 0.02  | 0.03 | 0.04  |
| VC0805  | 0.02  | 0.02  | 0.04 | 0.05  |
| VC0806  | 0.06  | 0.04  | 0.05 | 0.04  |
| VC0807  | 0.02  | 0.02  | 0.10 | 0.06  |
| VC0808  | 0.03  | 0.03  | 0.05 | 0.06  |
| VC0809  | 0.04  | 0.05  | 0.06 | 0.04  |
| VC0810  | 0.05  | 0.03  | 0.10 | 0.08  |

|        |       |       |      |       |
|--------|-------|-------|------|-------|
| VC0811 | 0.05  | 0.05  | 0.07 | 0.07  |
| VC0812 | 0.03  | 0.04  | 0.08 | 0.08  |
| VC0813 | 0.06  | 0.07  | 0.06 | 0.06  |
| VC0814 | 0.02  | 0.02  | 0.15 | 0.11  |
| VC0815 | 0.22  | 0.24  | 0.01 | 0.01  |
| VC0816 | 0.09  | 0.08  | 0.04 | 0.03  |
| VC0817 | 0.03  | 0.06  | 0.08 | 0.07  |
| VC0818 | 0.07  | 0.06  | 0.05 | 0.05  |
| VC0819 | 0.02  | 0.02  | 0.07 | 0.06  |
| VC0820 | 0.03  | 0.03  | 0.01 | 0.01  |
| VC0821 | 0.02  | 0.04  | 0.05 | 0.04  |
| VC0822 | 0.01  | 0.02  | 0.06 | 0.07  |
| VC0823 | 0.02  | 0.02  | 0.05 | 0.05  |
| VC0824 | 0.02  | 0.02  | 0.03 | 0.04  |
| VC0824 | 0.01  | 0.02  | 0.06 | 0.05  |
| VC0825 | 0.05  | 0.05  | 0.06 | 0.06  |
| VC0826 | 0.04  | 0.05  | 0.06 | 0.05  |
| VC0827 | 0.02  | 0.02  | 0.07 | 0.07  |
| VC0827 | 0.01  | -0.02 | 0.05 | 0.07  |
| VC0828 | 0.01  | 0.01  | 0.04 | 0.03  |
| VC0829 | 0.08  | 0.06  | 0.03 | 0.04  |
| VC0830 | 0.06  | 0.07  | 0.07 | -0.07 |
| VC0831 | 0.05  | 0.05  | 0.06 | 0.04  |
| VC0832 | 0.01  | 0.02  | 0.04 | 0.04  |
| VC0833 | 0.04  | 0.05  | 0.07 | 0.07  |
| VC0834 | 0.01  | 0.02  | 0.06 | 0.08  |
| VC0835 | 0.06  | 0.06  | 0.07 | 0.06  |
| VC0836 | 0.03  | 0.04  | 0.03 | 0.05  |
| VC0837 | 0.04  | 0.06  | 0.11 | 0.12  |
| VC0838 | 0.03  | 0.04  | 0.03 | 0.03  |
| VC0839 | 0.03  | 0.04  | 0.05 | 0.04  |
| VC0840 | 0.01  | 0.04  | 0.06 | 0.04  |
| VC0841 | 0.01  | 0.01  | 0.01 | 0.02  |
| VC0842 | 0.01  | 0.02  | 0.05 | 0.08  |
| VC0843 | 0.02  | 0.03  | 0.04 | 0.04  |
| VC0846 | 0.01  | 0.02  | 0.07 | 0.09  |
| VC0847 | 0.05  | 0.05  | 0.05 | 0.04  |
| VC0848 | 0.01  | 0.01  | 0.08 | 0.09  |
| VC0849 | -0.01 | 0.01  | 0.02 | 0.04  |
| VC0850 | 0.07  | 0.06  | 0.06 | 0.10  |
| VC0851 | 0.02  | 0.05  | 0.04 | 0.06  |
| VC0852 | 0.06  | 0.07  | 0.11 | 0.13  |
| VC0853 | 0.05  | 0.06  | 0.07 | 0.07  |

|        |      |      |      |      |
|--------|------|------|------|------|
| VC0854 | 0.08 | 0.07 | 0.04 | 0.05 |
| VC0855 | 0.04 | 0.04 | 0.10 | 0.08 |
| VC0856 | 0.03 | 0.06 | 0.04 | 0.04 |
| VC0857 | 0.06 | 0.07 | 0.05 | 0.04 |
| VC0858 | 0.03 | 0.02 | 0.05 | 0.04 |
| VC0859 | 0.03 | 0.04 | 0.06 | 0.05 |
| VC0860 | 0.04 | 0.04 | 0.04 | 0.04 |
| VC0861 | 0.04 | 0.10 | 0.08 | 0.07 |
| VC0862 | 0.05 | 0.05 | 0.10 | 0.06 |
| VC0863 | 0.03 | 0.03 | 0.08 | 0.05 |
| VC0864 | 0.05 | 0.07 | 0.07 | 0.08 |
| VC0865 | 0.06 | 0.07 | 0.03 | 0.03 |
| VC0866 | 0.00 | 0.00 | 0.03 | 0.02 |
| VC0867 | 0.05 | 0.05 | 0.02 | 0.02 |
| VC0868 | 0.04 | 0.03 | 0.06 | 0.06 |
| VC0869 | 0.07 | 0.08 | 0.09 | 0.07 |
| VC0870 | 0.01 | 0.03 | 0.05 | 0.04 |
| VC0871 | 0.10 | 0.09 | 0.04 | 0.03 |
| VC0872 | 0.08 | 0.08 | 0.03 | 0.03 |
| VC0873 | 0.02 | 0.03 | 0.06 | 0.08 |
| VC0874 | 0.03 | 0.03 | 0.07 | 0.04 |
| VC0875 | 0.06 | 0.06 | 0.01 | 0.03 |
| VC0876 | 0.02 | 0.02 | 0.07 | 0.10 |
| VC0877 | 0.10 | 0.09 | 0.04 | 0.05 |
| VC0878 | 0.07 | 0.08 | 0.06 | 0.08 |
| VC0879 | 0.07 | 0.07 | 0.03 | 0.03 |
| VC0880 | 0.04 | 0.03 | 0.04 | 0.05 |
| VC0881 | 0.03 | 0.03 | 0.08 | 0.06 |
| VC0882 | 0.06 | 0.06 | 0.02 | 0.03 |
| VC0883 | 0.04 | 0.04 | 0.04 | 0.04 |
| VC0884 | 0.01 | 0.02 | 0.02 | 0.04 |
| VC0885 | 0.05 | 0.05 | 0.02 | 0.02 |
| VC0886 | 0.04 | 0.01 | 0.03 | 0.05 |
| VC0887 | 0.04 | 0.02 | 0.03 | 0.04 |
| VC0888 | 0.09 | 0.06 | 0.05 | 0.07 |
| VC0889 | 0.03 | 0.04 | 0.05 | 0.04 |
| VC0890 | 0.03 | 0.04 | 0.01 | 0.01 |
| VC0891 | 0.05 | 0.06 | 0.04 | 0.05 |
| VC0892 | 0.03 | 0.03 | 0.05 | 0.03 |
| VC0893 | 0.04 | 0.04 | 0.03 | 0.04 |
| VC0894 | 0.01 | 0.02 | 0.07 | 0.06 |
| VC0895 | 0.02 | 0.04 | 0.05 | 0.05 |
| VC0897 | 0.03 | 0.03 | 0.12 | 0.09 |

|        |      |      |      |      |
|--------|------|------|------|------|
| VC0898 | 0.07 | 0.08 | 0.06 | 0.07 |
| VC0899 | 0.00 | 0.02 | 0.11 | 0.08 |
| VC0900 | 0.04 | 0.04 | 0.04 | 0.04 |
| VC0901 | 0.06 | 0.06 | 0.06 | 0.08 |
| VC0902 | 0.05 | 0.04 | 0.07 | 0.05 |
| VC0903 | 0.14 | 0.06 | 0.01 | 0.03 |
| VC0904 | 0.02 | 0.01 | 0.10 | 0.08 |
| VC0905 | 0.04 | 0.04 | 0.09 | 0.09 |
| VC0906 | 0.02 | 0.02 | 0.15 | 0.14 |
| VC0907 | 0.06 | 0.07 | 0.05 | 0.05 |
| VC0908 | 0.04 | 0.06 | 0.05 | 0.03 |
| VC0909 | 0.03 | 0.02 | 0.04 | 0.06 |
| VC0910 | 0.02 | 0.02 | 0.11 | 0.16 |
| VC0911 | 0.08 | 0.09 | 0.05 | 0.04 |
| VC0912 | 0.02 | 0.04 | 0.04 | 0.05 |
| VC0914 | 0.04 | 0.05 | 0.06 | 0.05 |
| VC0915 | 0.05 | 0.05 | 0.06 | 0.04 |
| VC0916 | 0.05 | 0.05 | 0.05 | 0.05 |
| VC0917 | 0.04 | 0.04 | 0.06 | 0.06 |
| VC0918 | 0.05 | 0.06 | 0.11 | 0.12 |
| VC0919 | 0.07 | 0.08 | 0.04 | 0.03 |
| VC0920 | 0.03 | 0.03 | 0.14 | 0.12 |
| VC0921 | 0.04 | 0.05 | 0.18 | 0.16 |
| VC0922 | 0.02 | 0.01 | 0.03 | 0.08 |
| VC0923 | 0.04 | 0.05 | 0.00 | 0.04 |
| VC0924 | 0.04 | 0.01 | 0.03 | 0.04 |
| VC0925 | 0.05 | 0.06 | 0.04 | 0.04 |
| VC0926 | 0.01 | 0.03 | 0.04 | 0.03 |
| VC0927 | 0.02 | 0.01 | 0.04 | 0.03 |
| VC0928 | 0.03 | 0.05 | 0.05 | 0.03 |
| VC0929 | 0.04 | 0.02 | 0.03 | 0.03 |
| VC0930 | 0.06 | 0.05 | 0.06 | 0.06 |
| VC0931 | 0.01 | 0.02 | 0.04 | 0.04 |
| VC0932 | 0.01 | 0.01 | 0.03 | 0.04 |
| VC0932 | 0.01 | 0.02 | 0.03 | 0.02 |
| VC0934 | 0.03 | 0.01 | 0.05 | 0.05 |
| VC0935 | 0.02 | 0.03 | 0.03 | 0.05 |
| VC0936 | 0.03 | 0.04 | 0.02 | 0.03 |
| VC0937 | 0.02 | 0.04 | 0.07 | 0.06 |
| VC0938 | 0.01 | 0.00 | 0.07 | 0.05 |
| VC0939 | 0.06 | 0.05 | 0.01 | 0.02 |
| VC0940 | 0.06 | 0.06 | 0.01 | 0.01 |
| VC0941 | 0.05 | 0.06 | 0.03 | 0.03 |

|        |       |       |      |      |
|--------|-------|-------|------|------|
| VC0943 | 0.02  | 0.01  | 0.03 | 0.02 |
| VC0944 | 0.04  | 0.05  | 0.09 | 0.09 |
| VC0945 | 0.04  | 0.06  | 0.05 | 0.05 |
| VC0946 | 0.05  | 0.05  | 0.05 | 0.05 |
| VC0947 | 0.00  | 0.00  | 0.10 | 0.08 |
| VC0948 | 0.03  | 0.03  | 0.10 | 0.09 |
| VC0949 | 0.02  | 0.05  | 0.03 | 0.03 |
| VC0950 | 0.03  | 0.03  | 0.03 | 0.03 |
| VC0951 | 0.04  | 0.04  | 0.08 | 0.07 |
| VC0952 | 0.03  | 0.01  | 0.11 | 0.10 |
| VC0953 | 0.00  | 0.01  | 0.00 | 0.01 |
| VC0954 | 0.03  | 0.04  | 0.03 | 0.03 |
| VC0955 | 0.02  | 0.02  | 0.04 | 0.06 |
| VC0957 | 0.07  | 0.06  | 0.04 | 0.07 |
| VC0958 | 0.00  | 0.04  | 0.02 | 0.02 |
| VC0959 | 0.03  | 0.02  | 0.08 | 0.06 |
| VC0960 | 0.04  | 0.05  | 0.06 | 0.07 |
| VC0961 | 0.05  | 0.06  | 0.05 | 0.05 |
| VC0962 | 0.04  | 0.04  | 0.07 | 0.06 |
| VC0963 | 0.04  | 0.05  | 0.06 | 0.06 |
| VC0964 | 0.07  | 0.05  | 0.08 | 0.06 |
| VC0965 | 0.07  | 0.07  | 0.06 | 0.05 |
| VC0966 | 0.04  | 0.05  | 0.07 | 0.05 |
| VC0967 | -0.01 | 0.00  | 0.09 | 0.06 |
| VC0968 | 0.00  | 0.02  | 0.06 | 0.05 |
| VC0969 | 0.01  | 0.01  | 0.08 | 0.07 |
| VC0970 | -0.01 | 0.04  | 0.05 | 0.04 |
| VC0972 | -0.01 | -0.01 | 0.09 | 0.03 |
| VC0973 | 0.04  | 0.03  | 0.05 | 0.05 |
| VC0974 | 0.07  | 0.05  | 0.05 | 0.05 |
| VC0975 | 0.05  | 0.11  | 0.05 | 0.08 |
| VC0976 | -0.01 | -0.01 | 0.07 | 0.04 |
| VC0977 | 0.00  | 0.01  | 0.04 | 0.04 |
| VC0978 | 0.05  | 0.06  | 0.05 | 0.04 |
| VC0979 | 0.04  | 0.03  | 0.04 | 0.04 |
| VC0980 | 0.00  | 0.00  | 0.07 | 0.07 |
| VC0981 | 0.00  | 0.01  | 0.09 | 0.09 |
| VC0982 | 0.05  | 0.04  | 0.08 | 0.06 |
| VC0983 | -0.01 | -0.01 | 0.04 | 0.04 |
| VC0984 | 0.01  | 0.03  | 0.05 | 0.05 |
| VC0985 | 0.03  | 0.04  | 0.10 | 0.09 |
| VC0986 | 0.05  | 0.07  | 0.06 | 0.08 |
| VC0987 | 0.04  | 0.04  | 0.06 | 0.04 |

|        |       |       |       |       |
|--------|-------|-------|-------|-------|
| VC0988 | 0.00  | 0.00  | 0.06  | 0.05  |
| VC0989 | 0.04  | 0.05  | 0.03  | 0.03  |
| VC0990 | 0.00  | -0.01 | 0.09  | 0.06  |
| VC0991 | 0.01  | 0.00  | 0.08  | 0.08  |
| VC0992 | 0.00  | 0.01  | 0.07  | 0.07  |
| VC0993 | -0.01 | -0.01 | 0.06  | 0.06  |
| VC0994 | -0.02 | -0.01 | 0.07  | 0.06  |
| VC0995 | 0.13  | 0.10  | 0.05  | 0.07  |
| VC0996 | 0.05  | 0.02  | 0.02  | 0.01  |
| VC0997 | 0.06  | 0.09  | 0.04  | 0.05  |
| VC0998 | 0.00  | 0.04  | 0.03  | 0.04  |
| VC0999 | 0.05  | 0.04  | 0.06  | 0.05  |
| VC1000 | 0.05  | 0.06  | 0.04  | 0.06  |
| VC1001 | 0.04  | 0.04  | 0.06  | 0.07  |
| VC1002 | 0.03  | 0.04  | 0.04  | 0.04  |
| VC1003 | 0.02  | 0.03  | 0.06  | 0.05  |
| VC1004 | 0.02  | 0.04  | 0.04  | 0.05  |
| VC1005 | 0.03  | 0.03  | 0.05  | 0.05  |
| VC1006 | 0.00  | 0.01  | 0.00  | 0.00  |
| VC1007 | 0.03  | 0.05  | 0.06  | 0.05  |
| VC1008 | 0.02  | 0.13  | 0.05  | 0.05  |
| VC1009 | 0.04  | 0.05  | 0.05  | 0.04  |
| VC1010 | 0.03  | 0.03  | 0.05  | 0.10  |
| VC1011 | 0.00  | 0.03  | 0.06  | 0.05  |
| VC1012 | 0.04  | 0.03  | 0.05  | 0.05  |
| VC1013 | 0.08  | 0.02  | 0.02  | 0.04  |
| VC1014 | 0.02  | 0.01  | -0.01 | -0.01 |
| VC1015 | 0.05  | 0.07  | -0.03 | -0.01 |
| VC1016 | 0.02  | 0.02  | 0.04  | 0.03  |
| VC1017 | 0.04  | 0.03  | 0.04  | 0.05  |
| VC1018 | 0.04  | 0.04  | 0.02  | 0.02  |
| VC1020 | 0.10  | 0.07  | 0.05  | 0.07  |
| VC1021 | 0.03  | 0.02  | 0.05  | 0.05  |
| VC1022 | -0.02 | -0.02 | 0.06  | 0.01  |
| VC1023 | 0.03  | 0.04  | 0.09  | 0.08  |
| VC1024 | 0.01  | 0.03  | 0.02  | 0.02  |
| VC1025 | 0.04  | 0.05  | 0.02  | 0.03  |
| VC1026 | 0.09  | 0.09  | 0.02  | 0.05  |
| VC1027 | 0.06  | 0.06  | 0.04  | 0.06  |
| VC1028 | 0.02  | 0.03  | 0.04  | 0.04  |
| VC1029 | 0.00  | -0.01 | -0.02 | -0.01 |
| VC1030 | 0.07  | 0.06  | 0.04  | 0.03  |
| VC1031 | 0.04  | 0.06  | 0.03  | 0.03  |



|        |      |      |       |       |
|--------|------|------|-------|-------|
| VC1032 | 0.06 | 0.08 | 0.05  | 0.02  |
| VC1033 | 0.03 | 0.04 | 0.03  | 0.01  |
| VC1034 | 0.03 | 0.03 | 0.04  | 0.06  |
| VC1035 | 0.07 | 0.05 | 0.04  | 0.04  |
| VC1037 | 0.05 | 0.06 | 0.06  | 0.05  |
| VC1038 | 0.09 | 0.07 | 0.07  | 0.09  |
| VC1039 | 0.02 | 0.04 | 0.01  | 0.01  |
| VC1040 | 0.04 | 0.04 | 0.06  | 0.05  |
| VC1041 | 0.03 | 0.04 | 0.02  | 0.03  |
| VC1043 | 0.04 | 0.03 | 0.04  | 0.04  |
| VC1044 | 0.03 | 0.04 | 0.04  | 0.02  |
| VC1045 | 0.03 | 0.03 | -0.01 | -0.01 |
| VC1046 | 0.07 | 0.06 | 0.04  | 0.05  |
| VC1047 | 0.03 | 0.03 | 0.06  | 0.04  |
| VC1048 | 0.04 | 0.05 | 0.04  | 0.03  |
| VC1049 | 0.06 | 0.06 | 0.07  | 0.07  |
| VC1050 | 0.02 | 0.03 | 0.04  | 0.06  |
| VC1051 | 0.08 | 0.07 | 0.03  | 0.05  |
| VC1052 | 0.05 | 0.06 | 0.03  | 0.03  |
| VC1053 | 0.09 | 0.08 | 0.03  | 0.05  |
| VC1054 | 0.08 | 0.08 | 0.03  | 0.06  |
| VC1055 | 0.13 | 0.14 | 0.07  | 0.09  |
| VC1056 | 0.04 | 0.05 | 0.04  | 0.03  |
| VC1057 | 0.05 | 0.05 | 0.04  | 0.05  |
| VC1058 | 0.06 | 0.07 | 0.04  | 0.07  |
| VC1059 | 0.05 | 0.05 | 0.04  | 0.03  |
| VC1060 | 0.02 | 0.02 | 0.05  | 0.06  |
| VC1061 | 0.01 | 0.01 | 0.06  | 0.06  |
| VC1062 | 0.05 | 0.06 | 0.08  | 0.04  |
| VC1063 | 0.08 | 0.11 | 0.08  | 0.07  |
| VC1064 | 0.08 | 0.08 | 0.04  | 0.04  |
| VC1065 | 0.10 | 0.09 | 0.03  | 0.02  |
| VC1066 | 0.08 | 0.07 | 0.04  | 0.04  |
| VC1067 | 0.02 | 0.01 | -0.02 | -0.02 |
| VC1068 | 0.08 | 0.07 | 0.06  | 0.04  |
| VC1069 | 0.02 | 0.04 | 0.05  | 0.05  |
| VC1070 | 0.13 | 0.09 | 0.03  | 0.10  |
| VC1071 | 0.06 | 0.08 | 0.04  | 0.06  |
| VC1072 | 0.06 | 0.06 | 0.11  | 0.14  |
| VC1074 | 0.07 | 0.05 | 0.07  | 0.06  |
| VC1075 | 0.09 | 0.08 | 0.07  | 0.06  |
| VC1077 | 0.06 | 0.09 | 0.02  | 0.02  |
| VC1078 | 0.06 | 0.06 | 0.06  | 0.07  |

|        |      |      |      |      |
|--------|------|------|------|------|
| VC1079 | 0.02 | 0.02 | 0.04 | 0.05 |
| VC1080 | 0.08 | 0.08 | 0.06 | 0.04 |
| VC1081 | 0.08 | 0.09 | 0.06 | 0.05 |
| VC1082 | 0.06 | 0.06 | 0.07 | 0.05 |
| VC1083 | 0.04 | 0.06 | 0.07 | 0.09 |
| VC1084 | 0.08 | 0.09 | 0.06 | 0.05 |
| VC1085 | 0.07 | 0.07 | 0.08 | 0.07 |
| VC1086 | 0.00 | 0.00 | 0.02 | 0.02 |
| VC1087 | 0.05 | 0.05 | 0.04 | 0.06 |
| VC1088 | 0.05 | 0.05 | 0.04 | 0.05 |
| VC1089 | 0.07 | 0.07 | 0.05 | 0.05 |
| VC1090 | 0.08 | 0.08 | 0.02 | 0.03 |
| VC1091 | 0.04 | 0.05 | 0.05 | 0.06 |
| VC1092 | 0.04 | 0.05 | 0.07 | 0.08 |
| VC1093 | 0.05 | 0.07 | 0.04 | 0.06 |
| VC1094 | 0.04 | 0.05 | 0.07 | 0.05 |
| VC1095 | 0.05 | 0.04 | 0.06 | 0.06 |
| VC1096 | 0.07 | 0.06 | 0.10 | 0.08 |
| VC1097 | 0.02 | 0.02 | 0.06 | 0.06 |
| VC1098 | 0.07 | 0.08 | 0.08 | 0.08 |
| VC1099 | 0.05 | 0.04 | 0.12 | 0.07 |
| VC1100 | 0.07 | 0.06 | 0.16 | 0.12 |
| VC1101 | 0.06 | 0.05 | 0.09 | 0.08 |
| VC1102 | 0.04 | 0.04 | 0.03 | 0.02 |
| VC1103 | 0.04 | 0.05 | 0.03 | 0.03 |
| VC1104 | 0.04 | 0.04 | 0.00 | 0.00 |
| VC1105 | 0.02 | 0.03 | 0.03 | 0.05 |
| VC1106 | 0.08 | 0.07 | 0.08 | 0.08 |
| VC1107 | 0.03 | 0.04 | 0.05 | 0.04 |
| VC1108 | 0.07 | 0.05 | 0.04 | 0.05 |
| VC1109 | 0.04 | 0.06 | 0.06 | 0.03 |
| VC1109 | 0.05 | 0.07 | 0.05 | 0.06 |
| VC1110 | 0.03 | 0.05 | 0.05 | 0.04 |
| VC1111 | 0.08 | 0.09 | 0.04 | 0.06 |
| VC1112 | 0.10 | 0.07 | 0.05 | 0.05 |
| VC1113 | 0.06 | 0.05 | 0.07 | 0.08 |
| VC1114 | 0.06 | 0.05 | 0.06 | 0.08 |
| VC1115 | 0.07 | 0.06 | 0.11 | 0.11 |
| VC1116 | 0.04 | 0.04 | 0.04 | 0.04 |
| VC1117 | 0.04 | 0.05 | 0.11 | 0.10 |
| VC1118 | 0.04 | 0.04 | 0.04 | 0.05 |
| VC1119 | 0.04 | 0.06 | 0.10 | 0.09 |
| VC1120 | 0.05 | 0.04 | 0.03 | 0.05 |

|        |      |      |      |      |
|--------|------|------|------|------|
| VC1121 | 0.04 | 0.04 | 0.03 | 0.03 |
| VC1122 | 0.06 | 0.06 | 0.05 | 0.06 |
| VC1123 | 0.04 | 0.04 | 0.07 | 0.06 |
| VC1124 | 0.00 | 0.04 | 0.07 | 0.08 |
| VC1125 | 0.05 | 0.05 | 0.06 | 0.06 |
| VC1126 | 0.05 | 0.08 | 0.08 | 0.09 |
| VC1127 | 0.06 | 0.06 | 0.07 | 0.14 |
| VC1128 | 0.02 | 0.02 | 0.01 | 0.02 |
| VC1129 | 0.06 | 0.07 | 0.08 | 0.06 |
| VC1130 | 0.07 | 0.07 | 0.08 | 0.07 |
| VC1131 | 0.06 | 0.07 | 0.09 | 0.09 |
| VC1132 | 0.03 | 0.04 | 0.10 | 0.11 |
| VC1133 | 0.04 | 0.04 | 0.07 | 0.06 |
| VC1134 | 0.03 | 0.03 | 0.05 | 0.06 |
| VC1135 | 0.03 | 0.03 | 0.08 | 0.09 |
| VC1136 | 0.04 | 0.03 | 0.05 | 0.05 |
| VC1137 | 0.04 | 0.05 | 0.06 | 0.08 |
| VC1138 | 0.06 | 0.05 | 0.08 | 0.09 |
| VC1139 | 0.04 | 0.03 | 0.07 | 0.06 |
| VC1140 | 0.06 | 0.06 | 0.12 | 0.07 |
| VC1141 | 0.02 | 0.02 | 0.06 | 0.05 |
| VC1142 | 0.05 | 0.05 | 0.05 | 0.09 |
| VC1143 | 0.05 | 0.05 | 0.15 | 0.08 |
| VC1144 | 0.02 | 0.04 | 0.04 | 0.04 |
| VC1145 | 0.03 | 0.06 | 0.03 | 0.03 |
| VC1146 | 0.06 | 0.05 | 0.09 | 0.11 |
| VC1147 | 0.07 | 0.07 | 0.10 | 0.15 |
| VC1148 | 0.05 | 0.06 | 0.02 | 0.04 |
| VC1149 | 0.08 | 0.07 | 0.03 | 0.05 |
| VC1150 | 0.03 | 0.03 | 0.09 | 0.08 |
| VC1151 | 0.07 | 0.06 | 0.10 | 0.06 |
| VC1152 | 0.07 | 0.06 | 0.11 | 0.06 |
| VC1153 | 0.01 | 0.01 | 0.20 | 0.18 |
| VC1154 | 0.05 | 0.05 | 0.06 | 0.05 |
| VC1155 | 0.05 | 0.05 | 0.09 | 0.10 |
| VC1156 | 0.03 | 0.03 | 0.03 | 0.03 |
| VC1156 | 0.00 | 0.05 | 0.06 | 0.06 |
| VC1158 | 0.00 | 0.00 | 0.07 | 0.07 |
| VC1159 | 0.03 | 0.02 | 0.06 | 0.04 |
| VC1160 | 0.07 | 0.05 | 0.05 | 0.04 |
| VC1161 | 0.04 | 0.05 | 0.08 | 0.07 |
| VC1162 | 0.07 | 0.07 | 0.06 | 0.07 |
| VC1163 | 0.04 | 0.04 | 0.06 | 0.01 |

|        |      |      |       |       |
|--------|------|------|-------|-------|
| VC1164 | 0.08 | 0.09 | 0.05  | 0.05  |
| VC1165 | 0.05 | 0.06 | 0.03  | 0.03  |
| VC1165 | 0.05 | 0.04 | 0.01  | 0.05  |
| VC1166 | 0.01 | 0.04 | 0.05  | 0.05  |
| VC1167 | 0.04 | 0.04 | 0.04  | 0.04  |
| VC1169 | 0.03 | 0.03 | 0.01  | 0.02  |
| VC1170 | 0.07 | 0.07 | 0.08  | 0.06  |
| VC1171 | 0.09 | 0.08 | 0.04  | 0.05  |
| VC1172 | 0.02 | 0.02 | 0.01  | 0.02  |
| VC1173 | 0.02 | 0.03 | 0.01  | 0.02  |
| VC1174 | 0.07 | 0.07 | 0.09  | 0.08  |
| VC1175 | 0.07 | 0.05 | 0.13  | 0.06  |
| VC1176 | 0.04 | 0.04 | 0.04  | 0.07  |
| VC1177 | 0.03 | 0.03 | 0.07  | 0.06  |
| VC1178 | 0.02 | 0.03 | 0.00  | 0.01  |
| VC1179 | 0.06 | 0.06 | 0.08  | 0.07  |
| VC1180 | 0.07 | 0.07 | 0.04  | 0.04  |
| VC1181 | 0.06 | 0.07 | 0.11  | 0.14  |
| VC1182 | 0.03 | 0.03 | 0.02  | 0.03  |
| VC1183 | 0.16 | 0.15 | 0.03  | 0.02  |
| VC1184 | 0.13 | 0.11 | 0.03  | 0.04  |
| VC1185 | 0.07 | 0.06 | 0.00  | 0.00  |
| VC1186 | 0.09 | 0.10 | 0.02  | 0.02  |
| VC1187 | 0.08 | 0.07 | 0.06  | 0.05  |
| VC1188 | 0.04 | 0.03 | 0.05  | 0.07  |
| VC1189 | 0.03 | 0.03 | 0.02  | 0.05  |
| VC1189 | 0.01 | 0.01 | 0.05  | 0.06  |
| VC1190 | 0.15 | 0.12 | 0.04  | 0.03  |
| VC1191 | 0.10 | 0.10 | 0.02  | 0.04  |
| VC1192 | 0.06 | 0.06 | 0.06  | 0.03  |
| VC1193 | 0.05 | 0.10 | 0.06  | 0.05  |
| VC1194 | 0.12 | 0.11 | 0.02  | 0.04  |
| VC1195 | 0.10 | 0.11 | 0.07  | 0.10  |
| VC1196 | 0.04 | 0.05 | 0.06  | 0.06  |
| VC1197 | 0.04 | 0.05 | 0.07  | 0.08  |
| VC1198 | 0.02 | 0.01 | 0.03  | 0.03  |
| VC1199 | 0.12 | 0.11 | 0.02  | 0.01  |
| VC1200 | 0.12 | 0.09 | 0.02  | 0.01  |
| VC1201 | 0.07 | 0.07 | 0.02  | 0.04  |
| VC1202 | 0.14 | 0.17 | 0.04  | 0.05  |
| VC1203 | 0.09 | 0.06 | -0.02 | -0.02 |
| VC1204 | 0.08 | 0.06 | -0.02 | -0.02 |
| VC1205 | 0.09 | 0.08 | 0.00  | 0.00  |

|        |       |       |       |      |
|--------|-------|-------|-------|------|
| VC1206 | 0.15  | 0.17  | 0.07  | 0.06 |
| VC1207 | 0.07  | 0.05  | 0.01  | 0.00 |
| VC1208 | 0.08  | 0.08  | 0.00  | 0.00 |
| VC1209 | 0.12  | 0.09  | 0.03  | 0.02 |
| VC1210 | 0.15  | 0.19  | 0.07  | 0.06 |
| VC1211 | -0.01 | -0.01 | -0.01 | 0.15 |
| VC1212 | 0.05  | 0.05  | 0.04  | 0.05 |
| VC1213 | 0.11  | 0.12  | 0.01  | 0.01 |
| VC1214 | 0.05  | 0.03  | 0.03  | 0.05 |
| VC1215 | 0.06  | 0.07  | 0.07  | 0.08 |
| VC1216 | 0.13  | 0.15  | 0.02  | 0.03 |
| VC1217 | 0.16  | 0.16  | 0.04  | 0.05 |
| VC1218 | 0.06  | 0.06  | 0.04  | 0.04 |
| VC1219 | 0.13  | 0.11  | 0.02  | 0.01 |
| VC1220 | 0.07  | 0.07  | 0.04  | 0.04 |
| VC1221 | 0.14  | 0.11  | 0.03  | 0.04 |
| VC1222 | 0.11  | 0.10  | 0.03  | 0.05 |
| VC1223 | 0.02  | 0.02  | 0.06  | 0.04 |
| VC1223 | 0.04  | 0.05  | 0.06  | 0.06 |
| VC1224 | 0.04  | 0.03  | 0.08  | 0.08 |
| VC1225 | 0.08  | 0.08  | 0.05  | 0.06 |
| VC1226 | 0.13  | 0.13  | 0.03  | 0.04 |
| VC1227 | 0.10  | 0.09  | 0.07  | 0.07 |
| VC1228 | 0.10  | 0.10  | 0.07  | 0.09 |
| VC1229 | 0.07  | 0.07  | 0.04  | 0.05 |
| VC1230 | 0.05  | 0.05  | 0.10  | 0.10 |
| VC1230 | 0.07  | 0.09  | 0.06  | 0.04 |
| VC1231 | 0.09  | 0.07  | 0.03  | 0.04 |
| VC1232 | 0.03  | 0.05  | 0.06  | 0.06 |
| VC1233 | 0.05  | 0.04  | 0.07  | 0.07 |
| VC1234 | 0.04  | 0.04  | 0.06  | 0.05 |
| VC1235 | 0.04  | 0.04  | 0.03  | 0.04 |
| VC1236 | 0.06  | 0.08  | 0.09  | 0.10 |
| VC1237 | 0.04  | 0.05  | 0.11  | 0.08 |
| VC1238 | 0.08  | 0.07  | 0.09  | 0.08 |
| VC1239 | 0.10  | 0.09  | 0.06  | 0.06 |
| VC1240 | 0.10  | 0.06  | 0.08  | 0.06 |
| VC1241 | 0.05  | 0.04  | 0.08  | 0.05 |
| VC1242 | 0.08  | 0.06  | 0.06  | 0.08 |
| VC1243 | 0.05  | 0.06  | 0.04  | 0.07 |
| VC1244 | 0.03  | 0.03  | 0.05  | 0.05 |
| VC1245 | 0.14  | 0.14  | 0.05  | 0.04 |
| VC1246 | 0.11  | 0.08  | 0.04  | 0.05 |

|        |      |      |      |      |
|--------|------|------|------|------|
| VC1247 | 0.06 | 0.04 | 0.09 | 0.08 |
| VC1248 | 0.05 | 0.05 | 0.05 | 0.04 |
| VC1249 | 0.06 | 0.06 | 0.05 | 0.05 |
| VC1250 | 0.12 | 0.12 | 0.18 | 0.06 |
| VC1251 | 0.06 | 0.08 | 0.03 | 0.04 |
| VC1252 | 0.08 | 0.06 | 0.08 | 0.09 |
| VC1253 | 0.05 | 0.05 | 0.07 | 0.06 |
| VC1254 | 0.05 | 0.05 | 0.06 | 0.05 |
| VC1255 | 0.02 | 0.02 | 0.01 | 0.01 |
| VC1256 | 0.09 | 0.09 | 0.04 | 0.04 |
| VC1257 | 0.07 | 0.07 | 0.09 | 0.08 |
| VC1258 | 0.02 | 0.02 | 0.05 | 0.05 |
| VC1259 | 0.06 | 0.05 | 0.06 | 0.05 |
| VC1260 | 0.03 | 0.03 | 0.08 | 0.07 |
| VC1261 | 0.05 | 0.07 | 0.09 | 0.06 |
| VC1262 | 0.06 | 0.04 | 0.07 | 0.06 |
| VC1263 | 0.03 | 0.03 | 0.06 | 0.06 |
| VC1265 | 0.06 | 0.07 | 0.03 | 0.06 |
| VC1266 | 0.01 | 0.01 | 0.05 | 0.03 |
| VC1267 | 0.00 | 0.01 | 0.06 | 0.05 |
| VC1268 | 0.01 | 0.02 | 0.04 | 0.03 |
| VC1269 | 0.04 | 0.04 | 0.06 | 0.05 |
| VC1270 | 0.00 | 0.03 | 0.04 | 0.03 |
| VC1271 | 0.01 | 0.02 | 0.05 | 0.04 |
| VC1272 | 0.02 | 0.02 | 0.06 | 0.06 |
| VC1273 | 0.04 | 0.04 | 0.06 | 0.09 |
| VC1274 | 0.04 | 0.04 | 0.05 | 0.04 |
| VC1275 | 0.02 | 0.02 | 0.04 | 0.03 |
| VC1276 | 0.03 | 0.03 | 0.04 | 0.03 |
| VC1277 | 0.04 | 0.03 | 0.07 | 0.06 |
| VC1278 | 0.02 | 0.03 | 0.11 | 0.10 |
| VC1279 | 0.04 | 0.05 | 0.03 | 0.03 |
| VC1280 | 0.02 | 0.02 | 0.06 | 0.05 |
| VC1281 | 0.06 | 0.05 | 0.04 | 0.03 |
| VC1282 | 0.01 | 0.02 | 0.03 | 0.03 |
| VC1283 | 0.09 | 0.09 | 0.03 | 0.03 |
| VC1284 | 0.03 | 0.03 | 0.04 | 0.03 |
| VC1285 | 0.03 | 0.03 | 0.06 | 0.05 |
| VC1286 | 0.01 | 0.02 | 0.06 | 0.04 |
| VC1287 | 0.02 | 0.02 | 0.05 | 0.05 |
| VC1288 | 0.03 | 0.04 | 0.05 | 0.05 |
| VC1289 | 0.01 | 0.02 | 0.05 | 0.05 |
| VC1290 | 0.03 | 0.03 | 0.08 | 0.07 |

|        |      |      |      |      |
|--------|------|------|------|------|
| VC1291 | 0.03 | 0.03 | 0.06 | 0.05 |
| VC1292 | 0.07 | 0.08 | 0.07 | 0.07 |
| VC1293 | 0.05 | 0.05 | 0.06 | 0.06 |
| VC1294 | 0.05 | 0.06 | 0.04 | 0.06 |
| VC1295 | 0.46 | 0.47 | 0.48 | 0.54 |
| VC1296 | 0.04 | 0.05 | 0.05 | 0.06 |
| VC1297 | 0.01 | 0.02 | 0.00 | 0.01 |
| VC1298 | 0.09 | 0.08 | 0.03 | 0.03 |
| VC1299 | 0.05 | 0.04 | 0.07 | 0.07 |
| VC1300 | 0.03 | 0.03 | 0.05 | 0.06 |
| VC1301 | 0.13 | 0.12 | 0.08 | 0.08 |
| VC1302 | 0.07 | 0.07 | 0.07 | 0.06 |
| VC1303 | 0.04 | 0.05 | 0.05 | 0.08 |
| VC1304 | 0.08 | 0.07 | 0.06 | 0.06 |
| VC1305 | 0.03 | 0.03 | 0.03 | 0.04 |
| VC1306 | 0.01 | 0.02 | 0.04 | 0.07 |
| VC1307 | 0.02 | 0.06 | 0.02 | 0.03 |
| VC1308 | 0.18 | 0.17 | 0.09 | 0.09 |
| VC1309 | 0.10 | 0.07 | 0.05 | 0.08 |
| VC1310 | 0.06 | 0.04 | 0.06 | 0.07 |
| VC1311 | 0.03 | 0.03 | 0.06 | 0.05 |
| VC1312 | 0.04 | 0.05 | 0.06 | 0.10 |
| VC1313 | 0.09 | 0.05 | 0.05 | 0.05 |
| VC1314 | 0.05 | 0.05 | 0.06 | 0.05 |
| VC1315 | 0.04 | 0.05 | 0.07 | 0.05 |
| VC1316 | 0.09 | 0.06 | 0.07 | 0.08 |
| VC1317 | 0.05 | 0.05 | 0.07 | 0.06 |
| VC1319 | 0.00 | 0.04 | 0.05 | 0.06 |
| VC1320 | 0.03 | 0.03 | 0.03 | 0.03 |
| VC1321 | 0.02 | 0.02 | 0.03 | 0.05 |
| VC1322 | 0.07 | 0.06 | 0.04 | 0.03 |
| VC1323 | 0.04 | 0.04 | 0.07 | 0.06 |
| VC1324 | 0.07 | 0.06 | 0.03 | 0.03 |
| VC1325 | 0.05 | 0.05 | 0.09 | 0.08 |
| VC1326 | 0.12 | 0.14 | 0.03 | 0.03 |
| VC1327 | 0.02 | 0.03 | 0.04 | 0.04 |
| VC1329 | 0.03 | 0.04 | 0.05 | 0.04 |
| VC1330 | 0.10 | 0.08 | 0.05 | 0.04 |
| VC1331 | 0.01 | 0.03 | 0.05 | 0.04 |
| VC1332 | 0.02 | 0.02 | 0.02 | 0.05 |
| VC1332 | 0.01 | 0.02 | 0.04 | 0.04 |
| VC1333 | 0.03 | 0.02 | 0.07 | 0.11 |
| VC1334 | 0.03 | 0.02 | 0.04 | 0.05 |

|        |      |      |      |      |
|--------|------|------|------|------|
| VC1335 | 0.02 | 0.03 | 0.06 | 0.07 |
| VC1336 | 0.07 | 0.07 | 0.04 | 0.05 |
| VC1337 | 0.06 | 0.06 | 0.04 | 0.04 |
| VC1338 | 0.04 | 0.04 | 0.08 | 0.04 |
| VC1339 | 0.04 | 0.04 | 0.06 | 0.05 |
| VC1340 | 0.05 | 0.03 | 0.04 | 0.03 |
| VC1341 | 0.05 | 0.05 | 0.10 | 0.08 |
| VC1341 | 0.01 | 0.01 | 0.05 | 0.05 |
| VC1342 | 0.02 | 0.01 | 0.04 | 0.04 |
| VC1343 | 0.03 | 0.05 | 0.05 | 0.05 |
| VC1344 | 0.08 | 0.07 | 0.07 | 0.07 |
| VC1345 | 0.08 | 0.08 | 0.11 | 0.15 |
| VC1346 | 0.05 | 0.03 | 0.06 | 0.06 |
| VC1348 | 0.45 | 0.44 | 0.43 | 0.41 |
| VC1349 | 0.10 | 0.12 | 0.03 | 0.03 |
| VC1350 | 0.06 | 0.06 | 0.09 | 0.08 |
| VC1351 | 0.04 | 0.04 | 0.06 | 0.05 |
| VC1352 | 0.03 | 0.05 | 0.04 | 0.05 |
| VC1353 | 0.01 | 0.01 | 0.01 | 0.00 |
| VC1354 | 0.05 | 0.05 | 0.06 | 0.05 |
| VC1355 | 0.06 | 0.06 | 0.04 | 0.05 |
| VC1356 | 0.05 | 0.06 | 0.09 | 0.12 |
| VC1357 | 0.07 | 0.08 | 0.06 | 0.02 |
| VC1358 | 0.07 | 0.07 | 0.05 | 0.04 |
| VC1359 | 0.04 | 0.05 | 0.10 | 0.07 |
| VC1360 | 0.05 | 0.04 | 0.07 | 0.08 |
| VC1361 | 0.04 | 0.05 | 0.07 | 0.07 |
| VC1362 | 0.07 | 0.04 | 0.06 | 0.07 |
| VC1363 | 0.02 | 0.06 | 0.06 | 0.07 |
| VC1364 | 0.06 | 0.07 | 0.05 | 0.04 |
| VC1365 | 0.07 | 0.08 | 0.04 | 0.06 |
| VC1366 | 0.08 | 0.04 | 0.05 | 0.05 |
| VC1367 | 0.02 | 0.05 | 0.06 | 0.07 |
| VC1368 | 0.04 | 0.05 | 0.06 | 0.06 |
| VC1369 | 0.03 | 0.03 | 0.06 | 0.04 |
| VC1370 | 0.40 | 0.43 | 0.40 | 0.39 |
| VC1371 | 0.05 | 0.04 | 0.04 | 0.05 |
| VC1372 | 0.04 | 0.02 | 0.03 | 0.04 |
| VC1373 | 0.07 | 0.07 | 0.07 | 0.06 |
| VC1374 | 0.08 | 0.05 | 0.05 | 0.04 |
| VC1375 | 0.06 | 0.05 | 0.05 | 0.07 |
| VC1377 | 0.04 | 0.05 | 0.04 | 0.04 |
| VC1378 | 0.04 | 0.05 | 0.07 | 0.07 |



|        |       |      |      |      |
|--------|-------|------|------|------|
| VC1379 | 0.07  | 0.08 | 0.08 | 0.07 |
| VC1380 | 0.05  | 0.05 | 0.05 | 0.05 |
| VC1381 | 0.08  | 0.07 | 0.05 | 0.05 |
| VC1382 | -0.01 | 0.02 | 0.03 | 0.05 |
| VC1382 | 0.02  | 0.04 | 0.05 | 0.04 |
| VC1383 | 0.03  | 0.04 | 0.08 | 0.07 |
| VC1384 | 0.02  | 0.03 | 0.03 | 0.03 |
| VC1385 | 0.09  | 0.06 | 0.10 | 0.06 |
| VC1386 | 0.07  | 0.04 | 0.06 | 0.05 |
| VC1387 | 0.06  | 0.05 | 0.04 | 0.04 |
| VC1388 | 0.06  | 0.05 | 0.08 | 0.07 |
| VC1389 | 0.04  | 0.05 | 0.07 | 0.06 |
| VC1390 | 0.06  | 0.06 | 0.05 | 0.04 |
| VC1391 | 0.02  | 0.03 | 0.08 | 0.06 |
| VC1392 | 0.05  | 0.06 | 0.04 | 0.06 |
| VC1393 | 0.02  | 0.02 | 0.04 | 0.03 |
| VC1394 | 0.08  | 0.13 | 0.06 | 0.05 |
| VC1395 | 0.04  | 0.04 | 0.07 | 0.04 |
| VC1396 | 0.07  | 0.06 | 0.04 | 0.04 |
| VC1397 | 0.08  | 0.07 | 0.06 | 0.06 |
| VC1398 | 0.07  | 0.07 | 0.03 | 0.04 |
| VC1399 | 0.04  | 0.05 | 0.04 | 0.03 |
| VC1400 | 0.05  | 0.06 | 0.05 | 0.05 |
| VC1401 | 0.01  | 0.03 | 0.05 | 0.05 |
| VC1402 | 0.02  | 0.02 | 0.04 | 0.04 |
| VC1403 | 0.07  | 0.08 | 0.06 | 0.06 |
| VC1404 | 0.09  | 0.08 | 0.02 | 0.03 |
| VC1405 | 0.02  | 0.02 | 0.13 | 0.10 |
| VC1406 | 0.07  | 0.06 | 0.14 | 0.14 |
| VC1407 | 0.05  | 0.05 | 0.02 | 0.04 |
| VC1408 | 0.01  | 0.02 | 0.04 | 0.04 |
| VC1409 | 0.06  | 0.04 | 0.03 | 0.02 |
| VC1410 | 0.06  | 0.05 | 0.05 | 0.05 |
| VC1411 | 0.03  | 0.03 | 0.03 | 0.03 |
| VC1412 | 0.09  | 0.07 | 0.06 | 0.08 |
| VC1413 | 0.10  | 0.10 | 0.00 | 0.02 |
| VC1414 | 0.02  | 0.02 | 0.05 | 0.03 |
| VC1415 | 0.09  | 0.09 | 0.06 | 0.06 |
| VC1416 | 0.04  | 0.06 | 0.04 | 0.05 |
| VC1417 | 0.03  | 0.03 | 0.07 | 0.07 |
| VC1418 | 0.01  | 0.02 | 0.01 | 0.01 |
| VC1419 | 0.02  | 0.03 | 0.05 | 0.03 |
| VC1420 | 0.02  | 0.02 | 0.02 | 0.03 |

|        |       |       |      |      |
|--------|-------|-------|------|------|
| VC1421 | 0.01  | 0.02  | 0.00 | 0.03 |
| VC1422 | 0.08  | 0.05  | 0.06 | 0.06 |
| VC1423 | 0.06  | 0.05  | 0.05 | 0.05 |
| VC1424 | 0.03  | 0.04  | 0.05 | 0.04 |
| VC1425 | 0.05  | 0.06  | 0.05 | 0.04 |
| VC1426 | 0.06  | 0.06  | 0.06 | 0.05 |
| VC1427 | 0.07  | 0.03  | 0.04 | 0.04 |
| VC1428 | 0.02  | 0.02  | 0.04 | 0.08 |
| VC1429 | 0.04  | 0.03  | 0.05 | 0.04 |
| VC1430 | 0.02  | 0.04  | 0.03 | 0.00 |
| VC1431 | 0.06  | 0.06  | 0.06 | 0.04 |
| VC1432 | 0.01  | 0.03  | 0.06 | 0.05 |
| VC1433 | 0.01  | 0.01  | 0.03 | 0.03 |
| VC1434 | 0.04  | 0.07  | 0.05 | 0.06 |
| VC1435 | 0.05  | 0.04  | 0.03 | 0.03 |
| VC1436 | 0.04  | 0.04  | 0.04 | 0.03 |
| VC1437 | 0.02  | 0.03  | 0.06 | 0.06 |
| VC1438 | 0.06  | 0.05  | 0.06 | 0.05 |
| VC1439 | 0.01  | 0.02  | 0.04 | 0.04 |
| VC1440 | 0.06  | 0.05  | 0.06 | 0.04 |
| VC1441 | 0.02  | 0.01  | 0.06 | 0.09 |
| VC1442 | -0.01 | -0.01 | 0.07 | 0.05 |
| VC1443 | 0.02  | 0.03  | 0.03 | 0.04 |
| VC1444 | 0.03  | 0.03  | 0.02 | 0.04 |
| VC1445 | 0.03  | 0.02  | 0.04 | 0.05 |
| VC1446 | 0.09  | 0.06  | 0.04 | 0.05 |
| VC1447 | 0.01  | 0.02  | 0.09 | 0.07 |
| VC1448 | 0.03  | 0.05  | 0.03 | 0.05 |
| VC1449 | 0.03  | 0.04  | 0.07 | 0.06 |
| VC1450 | 0.03  | 0.04  | 0.04 | 0.03 |
| VC1452 | 0.07  | 0.05  | 0.07 | 0.08 |
| VC1453 | 0.03  | 0.05  | 0.06 | 0.05 |
| VC1454 | 0.05  | 0.07  | 0.06 | 0.04 |
| VC1455 | 0.04  | 0.04  | 0.07 | 0.06 |
| VC1456 | 0.04  | 0.04  | 0.05 | 0.04 |
| VC1457 | 0.07  | 0.08  | 0.05 | 0.05 |
| VC1458 | 0.03  | 0.04  | 0.07 | 0.04 |
| VC1459 | 0.06  | 0.07  | 0.04 | 0.03 |
| VC1460 | 0.06  | 0.06  | 0.10 | 0.08 |
| VC1461 | 0.09  | 0.10  | 0.04 | 0.04 |
| VC1462 | 0.05  | 0.08  | 0.06 | 0.05 |
| VC1463 | 0.07  | 0.07  | 0.05 | 0.05 |
| VC1464 | 0.06  | 0.05  | 0.04 | 0.05 |

|        |       |      |      |      |
|--------|-------|------|------|------|
| VC1465 | 0.03  | 0.01 | 0.08 | 0.08 |
| VC1466 | 0.03  | 0.02 | 0.07 | 0.07 |
| VC1467 | 0.04  | 0.05 | 0.02 | 0.02 |
| VC1468 | 0.10  | 0.10 | 0.05 | 0.04 |
| VC1469 | -0.01 | 0.00 | 0.04 | 0.07 |
| VC1470 | 0.07  | 0.08 | 0.09 | 0.08 |
| VC1471 | 0.06  | 0.07 | 0.06 | 0.03 |
| VC1472 | 0.04  | 0.04 | 0.07 | 0.06 |
| VC1473 | 0.06  | 0.05 | 0.07 | 0.07 |
| VC1474 | 0.09  | 0.10 | 0.00 | 0.05 |
| VC1475 | 0.05  | 0.06 | 0.04 | 0.04 |
| VC1476 | 0.00  | 0.01 | 0.03 | 0.05 |
| VC1477 | 0.00  | 0.02 | 0.04 | 0.06 |
| VC1478 | 0.06  | 0.08 | 0.05 | 0.05 |
| VC1479 | -0.01 | 0.00 | 0.04 | 0.07 |
| VC1480 | 0.07  | 0.07 | 0.03 | 0.02 |
| VC1481 | 0.04  | 0.02 | 0.04 | 0.06 |
| VC1482 | 0.02  | 0.02 | 0.04 | 0.04 |
| VC1483 | 0.03  | 0.03 | 0.07 | 0.06 |
| VC1484 | 0.03  | 0.06 | 0.06 | 0.07 |
| VC1485 | 0.03  | 0.05 | 0.05 | 0.04 |
| VC1486 | 0.02  | 0.01 | 0.05 | 0.08 |
| VC1487 | 0.00  | 0.02 | 0.04 | 0.04 |
| VC1488 | 0.07  | 0.07 | 0.04 | 0.06 |
| VC1489 | 0.09  | 0.09 | 0.03 | 0.04 |
| VC1490 | 0.08  | 0.09 | 0.03 | 0.04 |
| VC1491 | 0.00  | 0.04 | 0.09 | 0.10 |
| VC1492 | 0.03  | 0.03 | 0.05 | 0.06 |
| VC1492 | 0.01  | 0.03 | 0.04 | 0.04 |
| VC1493 | 0.08  | 0.07 | 0.04 | 0.05 |
| VC1494 | 0.04  | 0.06 | 0.07 | 0.06 |
| VC1495 | 0.01  | 0.01 | 0.08 | 0.08 |
| VC1496 | 0.05  | 0.04 | 0.04 | 0.04 |
| VC1497 | 0.05  | 0.06 | 0.05 | 0.05 |
| VC1498 | 0.05  | 0.04 | 0.02 | 0.02 |
| VC1499 | 0.05  | 0.07 | 0.04 | 0.05 |
| VC1500 | 0.04  | 0.06 | 0.05 | 0.05 |
| VC1500 | 0.05  | 0.04 | 0.02 | 0.02 |
| VC1501 | 0.07  | 0.06 | 0.03 | 0.08 |
| VC1502 | 0.11  | 0.15 | 0.02 | 0.05 |
| VC1503 | 0.06  | 0.04 | 0.05 | 0.07 |
| VC1505 | 0.03  | 0.03 | 0.05 | 0.05 |
| VC1506 | 0.05  | 0.07 | 0.06 | 0.07 |

|        |      |      |      |      |
|--------|------|------|------|------|
| VC1507 | 0.03 | 0.04 | 0.08 | 0.07 |
| VC1508 | 0.05 | 0.06 | 0.02 | 0.05 |
| VC1509 | 0.05 | 0.04 | 0.07 | 0.07 |
| VC1510 | 0.03 | 0.05 | 0.07 | 0.06 |
| VC1511 | 0.09 | 0.09 | 0.08 | 0.10 |
| VC1512 | 0.05 | 0.05 | 0.08 | 0.09 |
| VC1513 | 0.08 | 0.05 | 0.07 | 0.06 |
| VC1514 | 0.04 | 0.04 | 0.05 | 0.07 |
| VC1515 | 0.09 | 0.08 | 0.07 | 0.06 |
| VC1516 | 0.06 | 0.05 | 0.07 | 0.04 |
| VC1517 | 0.04 | 0.05 | 0.05 | 0.04 |
| VC1518 | 0.05 | 0.12 | 0.07 | 0.10 |
| VC1519 | 0.08 | 0.06 | 0.05 | 0.06 |
| VC1520 | 0.05 | 0.05 | 0.04 | 0.05 |
| VC1521 | 0.04 | 0.04 | 0.07 | 0.08 |
| VC1523 | 0.12 | 0.08 | 0.04 | 0.04 |
| VC1524 | 0.03 | 0.06 | 0.05 | 0.05 |
| VC1525 | 0.07 | 0.07 | 0.03 | 0.06 |
| VC1526 | 0.06 | 0.05 | 0.06 | 0.06 |
| VC1527 | 0.12 | 0.12 | 0.05 | 0.06 |
| VC1528 | 0.02 | 0.02 | 0.03 | 0.03 |
| VC1529 | 0.03 | 0.03 | 0.06 | 0.04 |
| VC1530 | 0.04 | 0.04 | 0.08 | 0.06 |
| VC1531 | 0.04 | 0.06 | 0.08 | 0.08 |
| VC1532 | 0.05 | 0.06 | 0.04 | 0.06 |
| VC1533 | 0.04 | 0.05 | 0.03 | 0.03 |
| VC1534 | 0.03 | 0.02 | 0.09 | 0.10 |
| VC1535 | 0.02 | 0.01 | 0.04 | 0.03 |
| VC1537 | 0.03 | 0.03 | 0.04 | 0.03 |
| VC1538 | 0.04 | 0.06 | 0.05 | 0.06 |
| VC1539 | 0.05 | 0.04 | 0.06 | 0.06 |
| VC1540 | 0.00 | 0.04 | 0.04 | 0.04 |
| VC1541 | 0.02 | 0.04 | 0.05 | 0.07 |
| VC1542 | 0.03 | 0.02 | 0.05 | 0.04 |
| VC1543 | 0.03 | 0.04 | 0.07 | 0.06 |
| VC1544 | 0.03 | 0.03 | 0.03 | 0.03 |
| VC1545 | 0.05 | 0.06 | 0.06 | 0.06 |
| VC1546 | 0.02 | 0.04 | 0.02 | 0.03 |
| VC1547 | 0.03 | 0.03 | 0.06 | 0.05 |
| VC1548 | 0.02 | 0.02 | 0.05 | 0.04 |
| VC1549 | 0.05 | 0.05 | 0.03 | 0.05 |
| VC1550 | 0.02 | 0.03 | 0.07 | 0.06 |
| VC1551 | 0.06 | 0.06 | 0.05 | 0.07 |

|        |      |      |      |      |
|--------|------|------|------|------|
| VC1552 | 0.03 | 0.05 | 0.09 | 0.11 |
| VC1553 | 0.05 | 0.05 | 0.05 | 0.06 |
| VC1554 | 0.09 | 0.09 | 0.07 | 0.05 |
| VC1555 | 0.06 | 0.04 | 0.09 | 0.08 |
| VC1556 | 0.04 | 0.03 | 0.06 | 0.06 |
| VC1557 | 0.02 | 0.03 | 0.06 | 0.05 |
| VC1558 | 0.04 | 0.05 | 0.05 | 0.05 |
| VC1559 | 0.05 | 0.05 | 0.03 | 0.08 |
| VC1560 | 0.08 | 0.06 | 0.08 | 0.11 |
| VC1561 | 0.05 | 0.07 | 0.04 | 0.07 |
| VC1562 | 0.03 | 0.04 | 0.05 | 0.05 |
| VC1563 | 0.02 | 0.08 | 0.04 | 0.04 |
| VC1565 | 0.08 | 0.11 | 0.07 | 0.07 |
| VC1566 | 0.07 | 0.07 | 0.06 | 0.05 |
| VC1567 | 0.13 | 0.14 | 0.07 | 0.08 |
| VC1568 | 0.05 | 0.08 | 0.05 | 0.06 |
| VC1569 | 0.06 | 0.06 | 0.04 | 0.05 |
| VC1570 | 0.03 | 0.08 | 0.06 | 0.06 |
| VC1571 | 0.05 | 0.05 | 0.04 | 0.03 |
| VC1572 | 0.00 | 0.03 | 0.04 | 0.04 |
| VC1573 | 0.06 | 0.08 | 0.06 | 0.06 |
| VC1574 | 0.04 | 0.07 | 0.05 | 0.04 |
| VC1575 | 0.08 | 0.11 | 0.05 | 0.05 |
| VC1576 | 0.05 | 0.08 | 0.04 | 0.06 |
| VC1577 | 0.04 | 0.06 | 0.07 | 0.06 |
| VC1578 | 0.04 | 0.04 | 0.10 | 0.10 |
| VC1579 | 0.00 | 0.02 | 0.04 | 0.04 |
| VC1580 | 0.04 | 0.07 | 0.03 | 0.05 |
| VC1581 | 0.08 | 0.07 | 0.03 | 0.03 |
| VC1582 | 0.06 | 0.05 | 0.05 | 0.05 |
| VC1583 | 0.08 | 0.09 | 0.04 | 0.04 |
| VC1584 | 0.03 | 0.04 | 0.03 | 0.05 |
| VC1585 | 0.12 | 0.12 | 0.04 | 0.06 |
| VC1586 | 0.07 | 0.08 | 0.05 | 0.04 |
| VC1586 | 0.06 | 0.07 | 0.04 | 0.05 |
| VC1587 | 0.03 | 0.07 | 0.06 | 0.06 |
| VC1588 | 0.07 | 0.08 | 0.09 | 0.07 |
| VC1589 | 0.05 | 0.07 | 0.07 | 0.07 |
| VC1590 | 0.06 | 0.08 | 0.04 | 0.03 |
| VC1591 | 0.06 | 0.07 | 0.07 | 0.07 |
| VC1592 | 0.00 | 0.01 | 0.00 | 0.00 |
| VC1593 | 0.05 | 0.06 | 0.05 | 0.05 |
| VC1595 | 0.07 | 0.07 | 0.06 | 0.06 |

|        |       |      |       |       |
|--------|-------|------|-------|-------|
| VC1596 | 0.09  | 0.09 | 0.06  | 0.07  |
| VC1597 | 0.05  | 0.04 | 0.07  | 0.05  |
| VC1598 | 0.04  | 0.06 | 0.06  | 0.06  |
| VC1599 | -0.03 | 0.02 | -0.01 | -0.01 |
| VC1600 | 0.02  | 0.08 | 0.10  | 0.10  |
| VC1601 | 0.13  | 0.11 | 0.03  | 0.04  |
| VC1602 | 0.04  | 0.05 | 0.07  | 0.07  |
| VC1603 | 0.04  | 0.07 | 0.04  | 0.04  |
| VC1604 | 0.07  | 0.06 | 0.05  | 0.07  |
| VC1605 | 0.01  | 0.01 | 0.03  | 0.03  |
| VC1606 | 0.04  | 0.05 | 0.07  | 0.08  |
| VC1607 | 0.02  | 0.03 | 0.05  | 0.04  |
| VC1608 | 0.05  | 0.04 | 0.06  | 0.05  |
| VC1609 | 0.01  | 0.01 | 0.06  | 0.06  |
| VC1610 | 0.04  | 0.05 | 0.07  | 0.07  |
| VC1611 | 0.05  | 0.04 | 0.05  | 0.05  |
| VC1612 | 0.02  | 0.02 | 0.07  | 0.06  |
| VC1613 | 0.07  | 0.07 | 0.01  | 0.02  |
| VC1614 | 0.03  | 0.03 | 0.07  | 0.05  |
| VC1615 | 0.06  | 0.07 | 0.07  | 0.07  |
| VC1616 | 0.07  | 0.08 | 0.05  | 0.06  |
| VC1617 | 0.05  | 0.07 | 0.07  | 0.06  |
| VC1618 | 0.05  | 0.04 | 0.05  | 0.08  |
| VC1619 | 0.03  | 0.03 | 0.05  | 0.04  |
| VC1621 | 0.03  | 0.01 | 0.05  | 0.08  |
| VC1622 | 0.09  | 0.09 | 0.07  | 0.06  |
| VC1623 | 0.06  | 0.05 | 0.05  | 0.04  |
| VC1624 | 0.09  | 0.07 | 0.05  | 0.05  |
| VC1625 | 0.03  | 0.06 | 0.05  | 0.05  |
| VC1627 | 0.03  | 0.02 | 0.03  | 0.05  |
| VC1628 | 0.05  | 0.04 | 0.03  | 0.02  |
| VC1629 | 0.01  | 0.01 | 0.07  | 0.06  |
| VC1630 | 0.04  | 0.04 | 0.05  | 0.04  |
| VC1631 | 0.03  | 0.06 | 0.05  | 0.07  |
| VC1632 | 0.10  | 0.09 | 0.06  | 0.06  |
| VC1633 | 0.04  | 0.06 | 0.06  | 0.07  |
| VC1634 | 0.05  | 0.05 | 0.05  | 0.05  |
| VC1635 | 0.15  | 0.05 | 0.10  | 0.11  |
| VC1636 | 0.07  | 0.09 | 0.04  | 0.07  |
| VC1637 | 0.05  | 0.03 | 0.02  | 0.05  |
| VC1638 | 0.02  | 0.03 | 0.06  | 0.08  |
| VC1639 | 0.01  | 0.03 | 0.05  | 0.08  |
| VC1640 | 0.05  | 0.06 | 0.06  | 0.05  |

|        |      |      |      |      |
|--------|------|------|------|------|
| VC1641 | 0.56 | 0.56 | 0.58 | 0.60 |
| VC1642 | 0.07 | 0.05 | 0.09 | 0.11 |
| VC1643 | 0.01 | 0.01 | 0.05 | 0.03 |
| VC1644 | 0.01 | 0.02 | 0.04 | 0.07 |
| VC1646 | 0.07 | 0.08 | 0.05 | 0.05 |
| VC1647 | 0.02 | 0.01 | 0.04 | 0.03 |
| VC1648 | 0.05 | 0.09 | 0.05 | 0.06 |
| VC1648 | 0.06 | 0.06 | 0.01 | 0.04 |
| VC1649 | 0.01 | 0.03 | 0.02 | 0.02 |
| VC1651 | 0.01 | 0.01 | 0.04 | 0.04 |
| VC1652 | 0.29 | 0.28 | 0.04 | 0.03 |
| VC1653 | 0.06 | 0.06 | 0.05 | 0.06 |
| VC1654 | 0.06 | 0.06 | 0.04 | 0.04 |
| VC1656 | 0.05 | 0.06 | 0.04 | 0.04 |
| VC1657 | 0.07 | 0.09 | 0.04 | 0.04 |
| VC1658 | 0.07 | 0.11 | 0.06 | 0.05 |
| VC1659 | 0.05 | 0.08 | 0.13 | 0.06 |
| VC1660 | 0.05 | 0.06 | 0.07 | 0.05 |
| VC1661 | 0.05 | 0.06 | 0.04 | 0.04 |
| VC1662 | 0.05 | 0.06 | 0.06 | 0.07 |
| VC1663 | 0.09 | 0.11 | 0.06 | 0.06 |
| VC1664 | 0.04 | 0.12 | 0.07 | 0.07 |
| VC1665 | 0.08 | 0.08 | 0.05 | 0.05 |
| VC1666 | 0.04 | 0.05 | 0.04 | 0.05 |
| VC1667 | 0.03 | 0.02 | 0.05 | 0.05 |
| VC1668 | 0.03 | 0.04 | 0.06 | 0.06 |
| VC1669 | 0.02 | 0.02 | 0.01 | 0.04 |
| VC1670 | 0.06 | 0.06 | 0.05 | 0.06 |
| VC1671 | 0.07 | 0.06 | 0.15 | 0.12 |
| VC1672 | 0.06 | 0.05 | 0.12 | 0.09 |
| VC1673 | 0.04 | 0.05 | 0.08 | 0.11 |
| VC1674 | 0.06 | 0.06 | 0.12 | 0.09 |
| VC1675 | 0.03 | 0.03 | 0.10 | 0.09 |
| VC1676 | 0.06 | 0.07 | 0.09 | 0.10 |
| VC1677 | 0.03 | 0.04 | 0.06 | 0.06 |
| VC1678 | 0.08 | 0.07 | 0.15 | 0.15 |
| VC1679 | 0.05 | 0.05 | 0.09 | 0.08 |
| VC1680 | 0.05 | 0.04 | 0.05 | 0.03 |
| VC1681 | 0.05 | 0.06 | 0.09 | 0.09 |
| VC1682 | 0.06 | 0.06 | 0.12 | 0.10 |
| VC1683 | 0.04 | 0.05 | 0.02 | 0.02 |
| VC1684 | 0.05 | 0.06 | 0.09 | 0.09 |
| VC1685 | 0.05 | 0.05 | 0.10 | 0.08 |

|        |      |      |      |       |
|--------|------|------|------|-------|
| VC1686 | 0.11 | 0.12 | 0.09 | 0.05  |
| VC1687 | 0.07 | 0.08 | 0.16 | 0.10  |
| VC1688 | 0.09 | 0.05 | 0.05 | 0.06  |
| VC1689 | 0.07 | 0.06 | 0.08 | 0.04  |
| VC1690 | 0.04 | 0.04 | 0.06 | 0.05  |
| VC1691 | 0.10 | 0.05 | 0.01 | 0.05  |
| VC1692 | 0.03 | 0.04 | 0.06 | 0.04  |
| VC1693 | 0.06 | 0.03 | 0.03 | 0.04  |
| VC1695 | 0.07 | 0.06 | 0.13 | 0.09  |
| VC1696 | 0.08 | 0.08 | 0.10 | 0.09  |
| VC1697 | 0.07 | 0.08 | 0.15 | 0.11  |
| VC1698 | 0.06 | 0.05 | 0.05 | 0.04  |
| VC1699 | 0.04 | 0.05 | 0.02 | 0.06  |
| VC1700 | 0.06 | 0.05 | 0.03 | 0.03  |
| VC1701 | 0.04 | 0.05 | 0.05 | 0.05  |
| VC1702 | 0.05 | 0.05 | 0.08 | 0.08  |
| VC1703 | 0.03 | 0.03 | 0.09 | 0.06  |
| VC1704 | 0.04 | 0.05 | 0.05 | 0.06  |
| VC1705 | 0.03 | 0.03 | 0.04 | 0.03  |
| VC1706 | 0.06 | 0.07 | 0.10 | 0.08  |
| VC1707 | 0.07 | 0.07 | 0.12 | 0.12  |
| VC1708 | 0.04 | 0.06 | 0.07 | -0.05 |
| VC1709 | 0.02 | 0.02 | 0.02 | 0.07  |
| VC1710 | 0.34 | 0.30 | 0.30 | 0.26  |
| VC1711 | 0.04 | 0.05 | 0.04 | 0.05  |
| VC1712 | 0.02 | 0.02 | 0.06 | 0.04  |
| VC1713 | 0.10 | 0.10 | 0.10 | 0.08  |
| VC1714 | 0.01 | 0.02 | 0.06 | 0.05  |
| VC1714 | 0.02 | 0.03 | 0.04 | 0.04  |
| VC1715 | 0.07 | 0.06 | 0.05 | 0.03  |
| VC1716 | 0.09 | 0.11 | 0.05 | 0.05  |
| VC1717 | 0.06 | 0.07 | 0.07 | 0.13  |
| VC1718 | 0.08 | 0.09 | 0.10 | 0.08  |
| VC1719 | 0.01 | 0.03 | 0.05 | 0.04  |
| VC1720 | 0.04 | 0.06 | 0.05 | 0.04  |
| VC1721 | 0.05 | 0.06 | 0.07 | 0.07  |
| VC1722 | 0.05 | 0.05 | 0.04 | 0.04  |
| VC1724 | 0.06 | 0.06 | 0.06 | 0.05  |
| VC1725 | 0.07 | 0.08 | 0.10 | 0.10  |
| VC1726 | 0.02 | 0.02 | 0.02 | 0.02  |
| VC1727 | 0.01 | 0.01 | 0.05 | 0.04  |
| VC1728 | 0.04 | 0.06 | 0.02 | 0.04  |
| VC1729 | 0.07 | 0.07 | 0.05 | 0.08  |



|        |      |      |      |      |
|--------|------|------|------|------|
| VC1730 | 0.02 | 0.02 | 0.03 | 0.04 |
| VC1730 | 0.00 | 0.04 | 0.05 | 0.05 |
| VC1731 | 0.03 | 0.04 | 0.06 | 0.05 |
| VC1732 | 0.06 | 0.07 | 0.07 | 0.09 |
| VC1733 | 0.05 | 0.08 | 0.07 | 0.06 |
| VC1734 | 0.06 | 0.06 | 0.04 | 0.03 |
| VC1735 | 0.07 | 0.08 | 0.05 | 0.04 |
| VC1736 | 0.04 | 0.06 | 0.05 | 0.04 |
| VC1737 | 0.05 | 0.06 | 0.07 | 0.07 |
| VC1738 | 0.02 | 0.02 | 0.05 | 0.07 |
| VC1740 | 0.05 | 0.04 | 0.04 | 0.03 |
| VC1741 | 0.08 | 0.07 | 0.06 | 0.06 |
| VC1742 | 0.04 | 0.05 | 0.09 | 0.06 |
| VC1743 | 0.06 | 0.06 | 0.06 | 0.05 |
| VC1744 | 0.06 | 0.09 | 0.07 | 0.06 |
| VC1745 | 0.04 | 0.05 | 0.04 | 0.04 |
| VC1746 | 0.05 | 0.07 | 0.05 | 0.08 |
| VC1747 | 0.04 | 0.07 | 0.05 | 0.05 |
| VC1748 | 0.06 | 0.07 | 0.05 | 0.04 |
| VC1749 | 0.11 | 0.08 | 0.06 | 0.06 |
| VC1750 | 0.15 | 0.05 | 0.02 | 0.02 |
| VC1751 | 0.06 | 0.07 | 0.07 | 0.06 |
| VC1752 | 0.06 | 0.07 | 0.04 | 0.03 |
| VC1753 | 0.03 | 0.04 | 0.05 | 0.05 |
| VC1754 | 0.06 | 0.07 | 0.06 | 0.06 |
| VC1755 | 0.07 | 0.07 | 0.06 | 0.06 |
| VC1756 | 0.04 | 0.04 | 0.07 | 0.05 |
| VC1757 | 0.02 | 0.03 | 0.05 | 0.04 |
| VC1758 | 0.05 | 0.08 | 0.06 | 0.06 |
| VC1759 | 0.07 | 0.06 | 0.05 | 0.06 |
| VC1760 | 0.02 | 0.04 | 0.04 | 0.04 |
| VC1761 | 0.03 | 0.05 | 0.04 | 0.03 |
| VC1762 | 0.06 | 0.09 | 0.06 | 0.05 |
| VC1763 | 0.02 | 0.03 | 0.03 | 0.03 |
| VC1764 | 0.02 | 0.03 | 0.02 | 0.03 |
| VC1765 | 0.04 | 0.04 | 0.02 | 0.02 |
| VC1766 | 0.08 | 0.10 | 0.04 | 0.05 |
| VC1767 | 0.04 | 0.05 | 0.06 | 0.03 |
| VC1768 | 0.06 | 0.07 | 0.07 | 0.08 |
| VC1769 | 0.02 | 0.02 | 0.05 | 0.05 |
| VC1770 | 0.03 | 0.03 | 0.05 | 0.04 |
| VC1771 | 0.02 | 0.03 | 0.06 | 0.07 |
| VC1772 | 0.05 | 0.06 | 0.07 | 0.07 |

|        |      |      |       |      |
|--------|------|------|-------|------|
| VC1773 | 0.09 | 0.07 | 0.04  | 0.06 |
| VC1774 | 0.06 | 0.07 | 0.09  | 0.10 |
| VC1775 | 0.06 | 0.06 | 0.05  | 0.07 |
| VC1776 | 0.04 | 0.05 | 0.06  | 0.06 |
| VC1777 | 0.06 | 0.08 | 0.07  | 0.06 |
| VC1778 | 0.05 | 0.05 | 0.06  | 0.06 |
| VC1779 | 0.06 | 0.07 | 0.06  | 0.04 |
| VC1780 | 0.04 | 0.06 | 0.08  | 0.08 |
| VC1781 | 0.08 | 0.09 | 0.08  | 0.06 |
| VC1782 | 0.06 | 0.08 | 0.07  | 0.07 |
| VC1783 | 0.05 | 0.06 | 0.07  | 0.06 |
| VC1784 | 0.04 | 0.06 | 0.05  | 0.03 |
| VC1785 | 0.05 | 0.06 | 0.06  | 0.08 |
| VC1786 | 0.06 | 0.08 | 0.06  | 0.07 |
| VC1787 | 0.06 | 0.07 | 0.07  | 0.07 |
| VC1788 | 0.07 | 0.07 | 0.04  | 0.05 |
| VC1789 | 0.05 | 0.05 | 0.03  | 0.04 |
| VC1790 | 0.11 | 0.08 | 0.04  | 0.06 |
| VC1791 | 0.06 | 0.07 | 0.04  | 0.05 |
| VC1792 | 0.09 | 0.08 | 0.07  | 0.05 |
| VC1793 | 0.10 | 0.08 | 0.04  | 0.05 |
| VC1794 | 0.08 | 0.08 | 0.10  | 0.11 |
| VC1795 | 0.10 | 0.08 | 0.06  | 0.07 |
| VC1796 | 0.08 | 0.06 | 0.04  | 0.06 |
| VC1797 | 0.08 | 0.07 | 0.04  | 0.04 |
| VC1798 | 0.01 | 0.01 | -0.01 | 0.01 |
| VC1799 | 0.10 | 0.12 | 0.05  | 0.09 |
| VC1800 | 0.02 | 0.02 | 0.04  | 0.04 |
| VC1801 | 0.01 | 0.01 | 0.09  | 0.08 |
| VC1802 | 0.13 | 0.11 | 0.07  | 0.09 |
| VC1803 | 0.10 | 0.09 | 0.04  | 0.05 |
| VC1804 | 0.10 | 0.09 | 0.05  | 0.04 |
| VC1805 | 0.09 | 0.07 | 0.05  | 0.07 |
| VC1806 | 0.07 | 0.07 | 0.05  | 0.05 |
| VC1807 | 0.01 | 0.04 | 0.05  | 0.03 |
| VC1807 | 0.00 | 0.03 | 0.05  | 0.04 |
| VC1808 | 0.09 | 0.08 | 0.05  | 0.06 |
| VC1809 | 0.06 | 0.07 | 0.04  | 0.05 |
| VC1810 | 0.08 | 0.07 | 0.05  | 0.05 |
| VC1811 | 0.04 | 0.07 | 0.04  | 0.04 |
| VC1812 | 0.06 | 0.08 | 0.06  | 0.07 |
| VC1813 | 0.04 | 0.05 | 0.06  | 0.09 |
| VC1814 | 0.06 | 0.07 | 0.09  | 0.07 |

|        |      |       |      |       |
|--------|------|-------|------|-------|
| VC1815 | 0.07 | 0.06  | 0.07 | 0.06  |
| VC1816 | 0.03 | 0.05  | 0.07 | 0.08  |
| VC1817 | 0.06 | 0.06  | 0.05 | 0.06  |
| VC1818 | 0.02 | 0.04  | 0.06 | 0.05  |
| VC1819 | 0.05 | 0.06  | 0.03 | 0.05  |
| VC1820 | 0.11 | 0.08  | 0.08 | 0.10  |
| VC1821 | 0.05 | 0.06  | 0.02 | 0.04  |
| VC1822 | 0.08 | 0.06  | 0.08 | 0.05  |
| VC1823 | 0.11 | 0.12  | 0.04 | 0.06  |
| VC1824 | 0.10 | 0.11  | 0.07 | 0.05  |
| VC1825 | 0.14 | 0.15  | 0.05 | 0.06  |
| VC1826 | 0.04 | 0.04  | 0.04 | 0.06  |
| VC1827 | 0.06 | 0.04  | 0.07 | 0.07  |
| VC1828 | 0.09 | 0.09  | 0.07 | 0.05  |
| VC1829 | 0.04 | 0.06  | 0.09 | 0.10  |
| VC1830 | 0.05 | 0.05  | 0.06 | 0.04  |
| VC1830 | 0.06 | 0.07  | 0.09 | 0.07  |
| VC1831 | 0.03 | 0.04  | 0.05 | 0.06  |
| VC1831 | 0.02 | 0.01  | 0.03 | 0.02  |
| VC1832 | 0.03 | 0.02  | 0.08 | 0.05  |
| VC1833 | 0.10 | 0.11  | 0.04 | 0.04  |
| VC1834 | 0.08 | 0.07  | 0.05 | 0.04  |
| VC1835 | 0.03 | 0.02  | 0.06 | 0.06  |
| VC1836 | 0.06 | 0.06  | 0.06 | 0.06  |
| VC1837 | 0.03 | 0.06  | 0.09 | 0.09  |
| VC1838 | 0.09 | 0.08  | 0.07 | 0.07  |
| VC1839 | 0.06 | 0.06  | 0.07 | 0.08  |
| VC1840 | 0.06 | 0.04  | 0.05 | 0.05  |
| VC1841 | 0.05 | 0.07  | 0.05 | 0.06  |
| VC1842 | 0.04 | 0.05  | 0.04 | 0.03  |
| VC1842 | 0.05 | 0.06  | 0.06 | 0.07  |
| VC1843 | 0.01 | 0.01  | 0.00 | 0.00  |
| VC1844 | 0.09 | 0.09  | 0.04 | 0.06  |
| VC1845 | 0.09 | 0.08  | 0.08 | 0.07  |
| VC1846 | 0.18 | 0.14  | 0.08 | 0.05  |
| VC1847 | 0.04 | 0.03  | 0.06 | 0.06  |
| VC1848 | 0.03 | 0.05  | 0.08 | 0.06  |
| VC1849 | 0.05 | 0.05  | 0.10 | 0.09  |
| VC1851 | 0.00 | -0.02 | 0.00 | -0.01 |
| VC1852 | 0.10 | 0.09  | 0.11 | 0.09  |
| VC1853 | 0.07 | 0.16  | 0.04 | 0.04  |
| VC1854 | 0.15 | 0.13  | 0.08 | 0.09  |
| VC1855 | 0.01 | 0.03  | 0.04 | 0.04  |

|        |      |      |       |      |
|--------|------|------|-------|------|
| VC1856 | 0.11 | 0.12 | 0.06  | 0.04 |
| VC1857 | 0.05 | 0.04 | 0.09  | 0.07 |
| VC1858 | 0.05 | 0.05 | 0.05  | 0.06 |
| VC1859 | 0.03 | 0.04 | 0.05  | 0.04 |
| VC1860 | 0.12 | 0.12 | 0.05  | 0.06 |
| VC1861 | 0.04 | 0.04 | 0.06  | 0.05 |
| VC1862 | 0.09 | 0.10 | 0.05  | 0.06 |
| VC1863 | 0.12 | 0.11 | 0.04  | 0.05 |
| VC1864 | 0.05 | 0.06 | 0.05  | 0.06 |
| VC1865 | 0.10 | 0.11 | 0.05  | 0.04 |
| VC1866 | 0.04 | 0.04 | 0.04  | 0.05 |
| VC1868 | 0.07 | 0.08 | 0.03  | 0.07 |
| VC1869 | 0.03 | 0.05 | 0.05  | 0.06 |
| VC1870 | 0.03 | 0.04 | 0.05  | 0.05 |
| VC1871 | 0.04 | 0.08 | 0.03  | 0.03 |
| VC1872 | 0.04 | 0.02 | 0.08  | 0.06 |
| VC1873 | 0.06 | 0.05 | 0.06  | 0.06 |
| VC1874 | 0.08 | 0.10 | 0.06  | 0.04 |
| VC1875 | 0.07 | 0.08 | 0.07  | 0.07 |
| VC1876 | 0.05 | 0.04 | 0.06  | 0.05 |
| VC1877 | 0.01 | 0.01 | 0.01  | 0.01 |
| VC1878 | 0.06 | 0.06 | 0.05  | 0.06 |
| VC1879 | 0.04 | 0.03 | 0.04  | 0.06 |
| VC1879 | 0.02 | 0.01 | 0.04  | 0.04 |
| VC1880 | 0.09 | 0.10 | 0.04  | 0.05 |
| VC1881 | 0.07 | 0.08 | 0.04  | 0.04 |
| VC1882 | 0.02 | 0.02 | 0.00  | 0.01 |
| VC1883 | 0.11 | 0.10 | 0.05  | 0.05 |
| VC1884 | 0.12 | 0.11 | 0.05  | 0.04 |
| VC1885 | 0.10 | 0.11 | 0.05  | 0.07 |
| VC1886 | 0.01 | 0.01 | 0.07  | 0.06 |
| VC1887 | 0.10 | 0.10 | 0.04  | 0.03 |
| VC1888 | 0.02 | 0.01 | 0.04  | 0.05 |
| VC1889 | 0.13 | 0.13 | 0.05  | 0.04 |
| VC1890 | 0.13 | 0.13 | 0.07  | 0.07 |
| VC1891 | 0.04 | 0.04 | 0.04  | 0.05 |
| VC1891 | 0.07 | 0.07 | 0.04  | 0.03 |
| VC1892 | 0.11 | 0.10 | -0.02 | 0.02 |
| VC1893 | 0.15 | 0.14 | 0.02  | 0.04 |
| VC1894 | 0.07 | 0.05 | 0.03  | 0.03 |
| VC1895 | 0.01 | 0.02 | 0.03  | 0.00 |
| VC1896 | 0.08 | 0.08 | 0.03  | 0.05 |
| VC1897 | 0.10 | 0.09 | 0.00  | 0.00 |

|        |      |      |       |      |
|--------|------|------|-------|------|
| VC1898 | 0.04 | 0.05 | 0.06  | 0.06 |
| VC1899 | 0.12 | 0.10 | -0.01 | 0.03 |
| VC1900 | 0.03 | 0.03 | 0.07  | 0.03 |
| VC1901 | 0.09 | 0.08 | 0.03  | 0.03 |
| VC1902 | 0.16 | 0.13 | 0.02  | 0.02 |
| VC1903 | 0.06 | 0.05 | 0.06  | 0.03 |
| VC1904 | 0.10 | 0.09 | 0.00  | 0.01 |
| VC1905 | 0.13 | 0.12 | 0.00  | 0.01 |
| VC1906 | 0.14 | 0.12 | 0.00  | 0.02 |
| VC1907 | 0.05 | 0.05 | 0.00  | 0.01 |
| VC1908 | 0.06 | 0.07 | 0.08  | 0.06 |
| VC1909 | 0.04 | 0.07 | 0.04  | 0.04 |
| VC1910 | 0.04 | 0.07 | 0.04  | 0.03 |
| VC1911 | 0.05 | 0.04 | 0.03  | 0.03 |
| VC1912 | 0.06 | 0.03 | 0.06  | 0.09 |
| VC1913 | 0.06 | 0.05 | 0.04  | 0.04 |
| VC1914 | 0.04 | 0.05 | 0.03  | 0.03 |
| VC1915 | 0.06 | 0.09 | 0.05  | 0.05 |
| VC1916 | 0.04 | 0.04 | 0.08  | 0.07 |
| VC1917 | 0.04 | 0.03 | 0.06  | 0.04 |
| VC1918 | 0.06 | 0.07 | 0.04  | 0.03 |
| VC1919 | 0.09 | 0.09 | 0.07  | 0.07 |
| VC1920 | 0.05 | 0.06 | 0.06  | 0.07 |
| VC1921 | 0.01 | 0.02 | 0.02  | 0.04 |
| VC1922 | 0.06 | 0.05 | 0.05  | 0.05 |
| VC1923 | 0.06 | 0.06 | 0.08  | 0.08 |
| VC1924 | 0.06 | 0.05 | 0.05  | 0.02 |
| VC1925 | 0.07 | 0.07 | 0.07  | 0.05 |
| VC1926 | 0.04 | 0.04 | 0.10  | 0.09 |
| VC1927 | 0.05 | 0.06 | 0.04  | 0.04 |
| VC1928 | 0.03 | 0.03 | 0.08  | 0.06 |
| VC1929 | 0.09 | 0.07 | 0.07  | 0.09 |
| VC1930 | 0.05 | 0.06 | 0.04  | 0.04 |
| VC1931 | 0.06 | 0.05 | 0.04  | 0.05 |
| VC1932 | 0.02 | 0.02 | 0.02  | 0.04 |
| VC1933 | 0.11 | 0.12 | 0.06  | 0.05 |
| VC1934 | 0.10 | 0.11 | 0.01  | 0.02 |
| VC1935 | 0.01 | 0.01 | 0.05  | 0.06 |
| VC1936 | 0.02 | 0.02 | 0.04  | 0.05 |
| VC1937 | 0.05 | 0.05 | 0.06  | 0.06 |
| VC1938 | 0.03 | 0.04 | 0.04  | 0.07 |
| VC1938 | 0.02 | 0.02 | 0.05  | 0.04 |
| VC1939 | 0.03 | 0.04 | 0.05  | 0.05 |

|        |      |      |      |      |
|--------|------|------|------|------|
| VC1940 | 0.05 | 0.05 | 0.05 | 0.04 |
| VC1941 | 0.06 | 0.05 | 0.04 | 0.05 |
| VC1942 | 0.00 | 0.02 | 0.10 | 0.11 |
| VC1943 | 0.04 | 0.05 | 0.04 | 0.05 |
| VC1943 | 0.06 | 0.06 | 0.01 | 0.03 |
| VC1944 | 0.06 | 0.07 | 0.08 | 0.08 |
| VC1945 | 0.06 | 0.06 | 0.03 | 0.04 |
| VC1946 | 0.05 | 0.08 | 0.03 | 0.05 |
| VC1947 | 0.03 | 0.03 | 0.06 | 0.06 |
| VC1948 | 0.05 | 0.06 | 0.04 | 0.05 |
| VC1949 | 0.08 | 0.04 | 0.05 | 0.05 |
| VC1950 | 0.03 | 0.03 | 0.06 | 0.05 |
| VC1951 | 0.05 | 0.05 | 0.03 | 0.03 |
| VC1952 | 0.04 | 0.06 | 0.04 | 0.04 |
| VC1953 | 0.08 | 0.04 | 0.09 | 0.14 |
| VC1954 | 0.02 | 0.02 | 0.03 | 0.04 |
| VC1955 | 0.02 | 0.03 | 0.09 | 0.04 |
| VC1956 | 0.04 | 0.03 | 0.04 | 0.03 |
| VC1957 | 0.08 | 0.06 | 0.07 | 0.07 |
| VC1958 | 0.06 | 0.06 | 0.03 | 0.03 |
| VC1959 | 0.03 | 0.02 | 0.02 | 0.06 |
| VC1960 | 0.04 | 0.06 | 0.04 | 0.04 |
| VC1961 | 0.05 | 0.05 | 0.05 | 0.07 |
| VC1962 | 0.01 | 0.02 | 0.08 | 0.07 |
| VC1963 | 0.07 | 0.09 | 0.05 | 0.04 |
| VC1964 | 0.08 | 0.08 | 0.06 | 0.04 |
| VC1965 | 0.06 | 0.07 | 0.06 | 0.07 |
| VC1966 | 0.04 | 0.03 | 0.01 | 0.02 |
| VC1967 | 0.01 | 0.02 | 0.06 | 0.06 |
| VC1968 | 0.06 | 0.07 | 0.06 | 0.06 |
| VC1969 | 0.05 | 0.06 | 0.04 | 0.05 |
| VC1970 | 0.02 | 0.02 | 0.02 | 0.02 |
| VC1971 | 0.03 | 0.06 | 0.06 | 0.05 |
| VC1972 | 0.08 | 0.07 | 0.04 | 0.04 |
| VC1973 | 0.06 | 0.06 | 0.06 | 0.06 |
| VC1974 | 0.06 | 0.07 | 0.06 | 0.05 |
| VC1975 | 0.07 | 0.06 | 0.03 | 0.02 |
| VC1976 | 0.01 | 0.03 | 0.03 | 0.04 |
| VC1977 | 0.02 | 0.01 | 0.05 | 0.05 |
| VC1978 | 0.02 | 0.02 | 0.05 | 0.06 |
| VC1979 | 0.02 | 0.03 | 0.11 | 0.11 |
| VC1980 | 0.03 | 0.02 | 0.06 | 0.06 |
| VC1981 | 0.03 | 0.02 | 0.04 | 0.06 |

|        |      |      |      |      |
|--------|------|------|------|------|
| VC1982 | 0.06 | 0.08 | 0.03 | 0.03 |
| VC1983 | 0.08 | 0.09 | 0.04 | 0.04 |
| VC1984 | 0.03 | 0.04 | 0.04 | 0.02 |
| VC1985 | 0.09 | 0.10 | 0.04 | 0.05 |
| VC1986 | 0.03 | 0.05 | 0.08 | 0.05 |
| VC1987 | 0.02 | 0.02 | 0.05 | 0.05 |
| VC1988 | 0.05 | 0.05 | 0.06 | 0.04 |
| VC1989 | 0.03 | 0.02 | 0.09 | 0.07 |
| VC1990 | 0.05 | 0.05 | 0.05 | 0.04 |
| VC1991 | 0.03 | 0.05 | 0.04 | 0.04 |
| VC1992 | 0.04 | 0.04 | 0.07 | 0.06 |
| VC1993 | 0.03 | 0.03 | 0.04 | 0.06 |
| VC1994 | 0.05 | 0.04 | 0.04 | 0.04 |
| VC1995 | 0.03 | 0.02 | 0.11 | 0.11 |
| VC1996 | 0.05 | 0.05 | 0.04 | 0.03 |
| VC1997 | 0.06 | 0.07 | 0.03 | 0.03 |
| VC1998 | 0.07 | 0.07 | 0.03 | 0.02 |
| VC1999 | 0.06 | 0.07 | 0.05 | 0.03 |
| VC2000 | 0.03 | 0.05 | 0.06 | 0.06 |
| VC2001 | 0.05 | 0.05 | 0.07 | 0.05 |
| VC2002 | 0.01 | 0.01 | 0.05 | 0.05 |
| VC2003 | 0.07 | 0.07 | 0.03 | 0.04 |
| VC2004 | 0.06 | 0.07 | 0.05 | 0.04 |
| VC2005 | 0.09 | 0.10 | 0.03 | 0.04 |
| VC2006 | 0.06 | 0.03 | 0.05 | 0.04 |
| VC2007 | 0.06 | 0.07 | 0.09 | 0.08 |
| VC2008 | 0.05 | 0.07 | 0.05 | 0.04 |
| VC2009 | 0.07 | 0.06 | 0.05 | 0.05 |
| VC2010 | 0.06 | 0.06 | 0.05 | 0.06 |
| VC2011 | 0.01 | 0.01 | 0.01 | 0.01 |
| VC2012 | 0.03 | 0.04 | 0.05 | 0.03 |
| VC2013 | 0.03 | 0.03 | 0.06 | 0.04 |
| VC2014 | 0.09 | 0.10 | 0.02 | 0.03 |
| VC2015 | 0.06 | 0.06 | 0.04 | 0.03 |
| VC2016 | 0.04 | 0.04 | 0.02 | 0.02 |
| VC2017 | 0.06 | 0.07 | 0.04 | 0.04 |
| VC2018 | 0.08 | 0.07 | 0.02 | 0.02 |
| VC2019 | 0.06 | 0.06 | 0.07 | 0.04 |
| VC2021 | 0.06 | 0.09 | 0.06 | 0.05 |
| VC2022 | 0.06 | 0.07 | 0.07 | 0.05 |
| VC2023 | 0.04 | 0.04 | 0.05 | 0.05 |
| VC2024 | 0.00 | 0.03 | 0.02 | 0.03 |
| VC2025 | 0.04 | 0.04 | 0.06 | 0.06 |

|        |       |      |      |      |
|--------|-------|------|------|------|
| VC2026 | 0.04  | 0.04 | 0.05 | 0.05 |
| VC2027 | 0.04  | 0.04 | 0.05 | 0.07 |
| VC2028 | 0.05  | 0.06 | 0.05 | 0.06 |
| VC2029 | 0.05  | 0.05 | 0.03 | 0.04 |
| VC2030 | 0.01  | 0.02 | 0.00 | 0.01 |
| VC2031 | 0.00  | 0.02 | 0.05 | 0.04 |
| VC2032 | 0.03  | 0.03 | 0.04 | 0.04 |
| VC2033 | 0.05  | 0.07 | 0.08 | 0.09 |
| VC2034 | 0.07  | 0.07 | 0.06 | 0.07 |
| VC2035 | 0.04  | 0.05 | 0.07 | 0.06 |
| VC2036 | 0.03  | 0.03 | 0.06 | 0.03 |
| VC2037 | 0.09  | 0.09 | 0.05 | 0.07 |
| VC2039 | 0.06  | 0.07 | 0.05 | 0.05 |
| VC2040 | 0.06  | 0.05 | 0.06 | 0.06 |
| VC2041 | 0.00  | 0.01 | 0.04 | 0.07 |
| VC2042 | 0.10  | 0.07 | 0.04 | 0.06 |
| VC2043 | 0.04  | 0.06 | 0.04 | 0.05 |
| VC2044 | 0.05  | 0.06 | 0.06 | 0.07 |
| VC2045 | 0.02  | 0.05 | 0.08 | 0.06 |
| VC2046 | 0.04  | 0.05 | 0.02 | 0.04 |
| VC2047 | 0.06  | 0.05 | 0.07 | 0.09 |
| VC2048 | 0.03  | 0.03 | 0.02 | 0.02 |
| VC2049 | -0.01 | 0.01 | 0.04 | 0.03 |
| VC2051 | 0.06  | 0.07 | 0.04 | 0.06 |
| VC2052 | 0.01  | 0.02 | 0.05 | 0.05 |
| VC2053 | 0.06  | 0.06 | 0.03 | 0.03 |
| VC2054 | 0.00  | 0.02 | 0.03 | 0.05 |
| VC2055 | 0.00  | 0.03 | 0.03 | 0.03 |
| VC2056 | 0.01  | 0.03 | 0.01 | 0.05 |
| VC2057 | 0.04  | 0.04 | 0.04 | 0.04 |
| VC2058 | 0.05  | 0.03 | 0.04 | 0.06 |
| VC2059 | 0.03  | 0.03 | 0.07 | 0.06 |
| VC2060 | 0.03  | 0.02 | 0.05 | 0.04 |
| VC2061 | 0.01  | 0.01 | 0.05 | 0.04 |
| VC2062 | 0.03  | 0.04 | 0.04 | 0.05 |
| VC2063 | 0.04  | 0.06 | 0.06 | 0.05 |
| VC2064 | 0.03  | 0.02 | 0.05 | 0.05 |
| VC2065 | 0.10  | 0.09 | 0.04 | 0.04 |
| VC2066 | 0.04  | 0.04 | 0.21 | 0.22 |
| VC2067 | 0.05  | 0.03 | 0.04 | 0.05 |
| VC2068 | 0.00  | 0.01 | 0.03 | 0.03 |
| VC2069 | 0.06  | 0.06 | 0.05 | 0.06 |
| VC2070 | 0.02  | 0.01 | 0.05 | 0.05 |



|        |       |      |      |      |
|--------|-------|------|------|------|
| VC2071 | 0.05  | 0.05 | 0.04 | 0.05 |
| VC2072 | 0.07  | 0.05 | 0.05 | 0.04 |
| VC2073 | 0.03  | 0.04 | 0.03 | 0.07 |
| VC2074 | 0.06  | 0.05 | 0.02 | 0.01 |
| VC2075 | 0.07  | 0.08 | 0.03 | 0.03 |
| VC2076 | 0.08  | 0.06 | 0.08 | 0.06 |
| VC2077 | 0.03  | 0.02 | 0.05 | 0.06 |
| VC2078 | 0.11  | 0.12 | 0.04 | 0.03 |
| VC2079 | 0.08  | 0.08 | 0.02 | 0.05 |
| VC2080 | 0.03  | 0.05 | 0.04 | 0.04 |
| VC2081 | 0.05  | 0.05 | 0.05 | 0.04 |
| VC2082 | 0.06  | 0.08 | 0.04 | 0.03 |
| VC2083 | 0.02  | 0.01 | 0.09 | 0.07 |
| VC2084 | 0.02  | 0.02 | 0.03 | 0.03 |
| VC2085 | 0.02  | 0.03 | 0.01 | 0.01 |
| VC2086 | 0.04  | 0.04 | 0.01 | 0.03 |
| VC2087 | 0.01  | 0.01 | 0.06 | 0.05 |
| VC2088 | 0.03  | 0.03 | 0.07 | 0.05 |
| VC2089 | 0.01  | 0.02 | 0.15 | 0.13 |
| VC2090 | -0.01 | 0.02 | 0.03 | 0.03 |
| VC2091 | 0.04  | 0.04 | 0.05 | 0.04 |
| VC2092 | 0.06  | 0.06 | 0.07 | 0.07 |
| VC2093 | 0.05  | 0.06 | 0.03 | 0.04 |
| VC2094 | 0.04  | 0.04 | 0.11 | 0.10 |
| VC2095 | 0.04  | 0.05 | 0.16 | 0.14 |
| VC2096 | 0.02  | 0.03 | 0.24 | 0.20 |
| VC2097 | 0.04  | 0.04 | 0.12 | 0.11 |
| VC2098 | 0.02  | 0.03 | 0.02 | 0.00 |
| VC2099 | 0.03  | 0.02 | 0.00 | 0.00 |
| VC2100 | 0.03  | 0.04 | 0.11 | 0.12 |
| VC2101 | 0.06  | 0.06 | 0.03 | 0.04 |
| VC2102 | 0.05  | 0.07 | 0.02 | 0.04 |
| VC2103 | 0.02  | 0.01 | 0.06 | 0.05 |
| VC2105 | 0.07  | 0.08 | 0.04 | 0.04 |
| VC2106 | 0.03  | 0.03 | 0.01 | 0.02 |
| VC2107 | 0.03  | 0.02 | 0.05 | 0.05 |
| VC2108 | 0.01  | 0.03 | 0.05 | 0.06 |
| VC2109 | 0.02  | 0.02 | 0.07 | 0.10 |
| VC2110 | 0.08  | 0.05 | 0.04 | 0.04 |
| VC2111 | 0.05  | 0.06 | 0.03 | 0.02 |
| VC2112 | 0.02  | 0.03 | 0.06 | 0.06 |
| VC2112 | 0.01  | 0.01 | 0.05 | 0.05 |
| VC2113 | 0.06  | 0.06 | 0.03 | 0.03 |

|        |       |      |      |      |
|--------|-------|------|------|------|
| VC2114 | 0.05  | 0.06 | 0.01 | 0.02 |
| VC2115 | 0.07  | 0.05 | 0.04 | 0.06 |
| VC2116 | 0.03  | 0.03 | 0.06 | 0.08 |
| VC2117 | 0.04  | 0.05 | 0.03 | 0.05 |
| VC2118 | 0.02  | 0.03 | 0.05 | 0.06 |
| VC2119 | 0.04  | 0.03 | 0.05 | 0.03 |
| VC2120 | 0.02  | 0.03 | 0.04 | 0.03 |
| VC2121 | 0.04  | 0.04 | 0.08 | 0.06 |
| VC2122 | 0.06  | 0.07 | 0.02 | 0.04 |
| VC2123 | 0.00  | 0.00 | 0.04 | 0.05 |
| VC2124 | 0.03  | 0.05 | 0.03 | 0.04 |
| VC2125 | 0.04  | 0.04 | 0.02 | 0.04 |
| VC2126 | 0.01  | 0.01 | 0.05 | 0.05 |
| VC2127 | 0.03  | 0.03 | 0.04 | 0.04 |
| VC2128 | 0.02  | 0.02 | 0.04 | 0.04 |
| VC2129 | 0.07  | 0.08 | 0.03 | 0.03 |
| VC2130 | -0.01 | 0.04 | 0.05 | 0.04 |
| VC2131 | 0.06  | 0.08 | 0.06 | 0.08 |
| VC2132 | 0.06  | 0.05 | 0.05 | 0.04 |
| VC2133 | 0.01  | 0.02 | 0.04 | 0.04 |
| VC2134 | 0.02  | 0.02 | 0.07 | 0.05 |
| VC2134 | -0.02 | 0.00 | 0.04 | 0.04 |
| VC2135 | 0.05  | 0.04 | 0.10 | 0.10 |
| VC2136 | 0.02  | 0.02 | 0.04 | 0.05 |
| VC2137 | 0.02  | 0.04 | 0.15 | 0.15 |
| VC2138 | 0.05  | 0.07 | 0.06 | 0.07 |
| VC2139 | 0.05  | 0.05 | 0.08 | 0.08 |
| VC2140 | 0.01  | 0.02 | 0.04 | 0.04 |
| VC2141 | 0.03  | 0.04 | 0.06 | 0.06 |
| VC2142 | 0.05  | 0.03 | 0.03 | 0.14 |
| VC2143 | 0.04  | 0.02 | 0.07 | 0.06 |
| VC2144 | 0.02  | 0.02 | 0.09 | 0.09 |
| VC2145 | 0.05  | 0.04 | 0.11 | 0.09 |
| VC2146 | 0.00  | 0.03 | 0.00 | 0.01 |
| VC2147 | 0.03  | 0.03 | 0.03 | 0.02 |
| VC2148 | 0.03  | 0.04 | 0.04 | 0.03 |
| VC2149 | 0.03  | 0.03 | 0.06 | 0.04 |
| VC2150 | 0.02  | 0.01 | 0.06 | 0.07 |
| VC2151 | 0.04  | 0.05 | 0.04 | 0.04 |
| VC2152 | 0.05  | 0.02 | 0.08 | 0.07 |
| VC2153 | 0.02  | 0.03 | 0.04 | 0.07 |
| VC2154 | 0.05  | 0.06 | 0.03 | 0.03 |
| VC2155 | 0.02  | 0.02 | 0.05 | 0.06 |

|        |       |       |      |      |
|--------|-------|-------|------|------|
| VC2156 | 0.03  | 0.04  | 0.08 | 0.06 |
| VC2157 | 0.04  | 0.04  | 0.03 | 0.03 |
| VC2158 | 0.05  | 0.06  | 0.06 | 0.06 |
| VC2159 | 0.00  | 0.01  | 0.10 | 0.09 |
| VC2160 | 0.04  | 0.07  | 0.08 | 0.10 |
| VC2161 | -0.01 | 0.00  | 0.07 | 0.09 |
| VC2162 | 0.05  | 0.05  | 0.06 | 0.05 |
| VC2163 | 0.05  | 0.06  | 0.05 | 0.05 |
| VC2164 | 0.09  | 0.09  | 0.05 | 0.07 |
| VC2165 | 0.06  | 0.06  | 0.09 | 0.08 |
| VC2166 | 0.02  | 0.03  | 0.07 | 0.07 |
| VC2167 | 0.04  | 0.04  | 0.06 | 0.06 |
| VC2168 | 0.07  | 0.07  | 0.03 | 0.02 |
| VC2169 | 0.04  | 0.05  | 0.05 | 0.05 |
| VC2170 | 0.05  | 0.05  | 0.04 | 0.04 |
| VC2171 | 0.05  | 0.05  | 0.04 | 0.05 |
| VC2172 | 0.01  | 0.01  | 0.06 | 0.05 |
| VC2174 | 0.07  | 0.07  | 0.03 | 0.03 |
| VC2175 | 0.05  | 0.05  | 0.04 | 0.02 |
| VC2176 | 0.04  | 0.05  | 0.04 | 0.04 |
| VC2177 | -0.01 | -0.01 | 0.06 | 0.04 |
| VC2178 | 0.06  | 0.06  | 0.04 | 0.02 |
| VC2179 | 0.02  | 0.03  | 0.02 | 0.02 |
| VC2180 | 0.02  | 0.02  | 0.08 | 0.04 |
| VC2181 | 0.03  | 0.03  | 0.03 | 0.06 |
| VC2182 | 0.03  | 0.05  | 0.04 | 0.04 |
| VC2183 | 0.01  | 0.02  | 0.01 | 0.02 |
| VC2184 | 0.15  | 0.08  | 0.02 | 0.02 |
| VC2185 | 0.04  | 0.04  | 0.03 | 0.00 |
| VC2186 | 0.08  | 0.08  | 0.06 | 0.02 |
| VC2187 | 0.04  | 0.04  | 0.05 | 0.06 |
| VC2188 | 0.03  | 0.03  | 0.06 | 0.09 |
| VC2189 | 0.01  | 0.05  | 0.05 | 0.05 |
| VC2190 | 0.07  | 0.04  | 0.05 | 0.07 |
| VC2191 | 0.04  | 0.03  | 0.05 | 0.05 |
| VC2192 | 0.03  | 0.03  | 0.04 | 0.05 |
| VC2193 | 0.03  | 0.04  | 0.03 | 0.03 |
| VC2194 | 0.03  | 0.03  | 0.04 | 0.03 |
| VC2195 | 0.01  | 0.11  | 0.03 | 0.04 |
| VC2196 | 0.03  | 0.04  | 0.04 | 0.03 |
| VC2197 | 0.03  | 0.03  | 0.07 | 0.06 |
| VC2198 | 0.05  | 0.05  | 0.05 | 0.05 |
| VC2199 | 0.03  | 0.03  | 0.03 | 0.04 |

|        |      |      |      |      |
|--------|------|------|------|------|
| VC2200 | 0.02 | 0.03 | 0.05 | 0.06 |
| VC2201 | 0.02 | 0.04 | 0.03 | 0.04 |
| VC2202 | 0.03 | 0.07 | 0.05 | 0.04 |
| VC2203 | 0.02 | 0.03 | 0.02 | 0.03 |
| VC2204 | 0.06 | 0.07 | 0.04 | 0.03 |
| VC2205 | 0.04 | 0.07 | 0.07 | 0.06 |
| VC2206 | 0.03 | 0.10 | 0.05 | 0.04 |
| VC2207 | 0.08 | 0.09 | 0.02 | 0.03 |
| VC2208 | 0.02 | 0.02 | 0.01 | 0.01 |
| VC2209 | 0.00 | 0.01 | 0.03 | 0.05 |
| VC2210 | 0.03 | 0.04 | 0.04 | 0.04 |
| VC2211 | 0.02 | 0.02 | 0.04 | 0.13 |
| VC2212 | 0.01 | 0.02 | 0.07 | 0.09 |
| VC2213 | 0.02 | 0.03 | 0.01 | 0.01 |
| VC2214 | 0.01 | 0.01 | 0.00 | 0.01 |
| VC2215 | 0.01 | 0.02 | 0.04 | 0.04 |
| VC2216 | 0.06 | 0.06 | 0.04 | 0.03 |
| VC2217 | 0.01 | 0.01 | 0.02 | 0.02 |
| VC2218 | 0.09 | 0.08 | 0.02 | 0.03 |
| VC2219 | 0.08 | 0.06 | 0.01 | 0.01 |
| VC2220 | 0.02 | 0.03 | 0.00 | 0.01 |
| VC2221 | 0.09 | 0.07 | 0.05 | 0.05 |
| VC2222 | 0.07 | 0.07 | 0.07 | 0.08 |
| VC2223 | 0.04 | 0.05 | 0.03 | 0.04 |
| VC2224 | 0.02 | 0.02 | 0.01 | 0.02 |
| VC2225 | 0.09 | 0.08 | 0.03 | 0.04 |
| VC2226 | 0.05 | 0.06 | 0.06 | 0.04 |
| VC2227 | 0.06 | 0.05 | 0.07 | 0.07 |
| VC2228 | 0.09 | 0.08 | 0.02 | 0.02 |
| VC2229 | 0.05 | 0.07 | 0.04 | 0.03 |
| VC2230 | 0.06 | 0.06 | 0.06 | 0.07 |
| VC2231 | 0.04 | 0.05 | 0.05 | 0.05 |
| VC2232 | 0.05 | 0.08 | 0.06 | 0.06 |
| VC2233 | 0.03 | 0.02 | 0.01 | 0.01 |
| VC2234 | 0.05 | 0.06 | 0.08 | 0.05 |
| VC2235 | 0.05 | 0.07 | 0.04 | 0.05 |
| VC2236 | 0.14 | 0.13 | 0.08 | 0.08 |
| VC2237 | 0.03 | 0.03 | 0.05 | 0.01 |
| VC2238 | 0.08 | 0.08 | 0.09 | 0.07 |
| VC2239 | 0.08 | 0.09 | 0.08 | 0.09 |
| VC2240 | 0.05 | 0.06 | 0.05 | 0.04 |
| VC2241 | 0.05 | 0.06 | 0.05 | 0.06 |
| VC2242 | 0.03 | 0.03 | 0.09 | 0.08 |

|        |      |      |      |      |
|--------|------|------|------|------|
| VC2243 | 0.04 | 0.06 | 0.05 | 0.05 |
| VC2244 | 0.05 | 0.06 | 0.05 | 0.06 |
| VC2245 | 0.07 | 0.07 | 0.08 | 0.05 |
| VC2246 | 0.05 | 0.06 | 0.03 | 0.04 |
| VC2247 | 0.05 | 0.05 | 0.05 | 0.04 |
| VC2248 | 0.07 | 0.07 | 0.09 | 0.10 |
| VC2249 | 0.06 | 0.08 | 0.06 | 0.05 |
| VC2250 | 0.04 | 0.04 | 0.04 | 0.04 |
| VC2252 | 0.01 | 0.02 | 0.04 | 0.05 |
| VC2253 | 0.01 | 0.02 | 0.05 | 0.04 |
| VC2254 | 0.02 | 0.03 | 0.05 | 0.05 |
| VC2255 | 0.01 | 0.02 | 0.01 | 0.01 |
| VC2256 | 0.05 | 0.06 | 0.06 | 0.07 |
| VC2258 | 0.02 | 0.02 | 0.05 | 0.06 |
| VC2258 | 0.04 | 0.05 | 0.09 | 0.06 |
| VC2259 | 0.09 | 0.09 | 0.05 | 0.04 |
| VC2260 | 0.03 | 0.03 | 0.01 | 0.02 |
| VC2261 | 0.06 | 0.07 | 0.07 | 0.07 |
| VC2262 | 0.06 | 0.06 | 0.05 | 0.04 |
| VC2263 | 0.04 | 0.09 | 0.05 | 0.03 |
| VC2263 | 0.05 | 0.06 | 0.04 | 0.05 |
| VC2264 | 0.05 | 0.05 | 0.09 | 0.05 |
| VC2265 | 0.11 | 0.13 | 0.06 | 0.07 |
| VC2266 | 0.03 | 0.05 | 0.05 | 0.06 |
| VC2267 | 0.11 | 0.09 | 0.05 | 0.09 |
| VC2268 | 0.08 | 0.07 | 0.11 | 0.07 |
| VC2269 | 0.06 | 0.04 | 0.12 | 0.08 |
| VC2270 | 0.05 | 0.05 | 0.08 | 0.07 |
| VC2271 | 0.01 | 0.01 | 0.01 | 0.01 |
| VC2272 | 0.08 | 0.06 | 0.05 | 0.05 |
| VC2273 | 0.08 | 0.06 | 0.04 | 0.04 |
| VC2274 | 0.04 | 0.04 | 0.07 | 0.06 |
| VC2275 | 0.07 | 0.07 | 0.09 | 0.09 |
| VC2276 | 0.10 | 0.11 | 0.06 | 0.08 |
| VC2277 | 0.06 | 0.08 | 0.09 | 0.09 |
| VC2278 | 0.03 | 0.05 | 0.01 | 0.03 |
| VC2279 | 0.05 | 0.05 | 0.06 | 0.05 |
| VC2280 | 0.08 | 0.07 | 0.13 | 0.12 |
| VC2281 | 0.05 | 0.05 | 0.06 | 0.06 |
| VC2282 | 0.00 | 0.02 | 0.00 | 0.04 |
| VC2282 | 0.01 | 0.05 | 0.05 | 0.06 |
| VC2283 | 0.12 | 0.15 | 0.07 | 0.07 |
| VC2284 | 0.05 | 0.04 | 0.05 | 0.06 |

|        |       |       |       |       |
|--------|-------|-------|-------|-------|
| VC2285 | -0.02 | 0.00  | -0.01 | -0.01 |
| VC2286 | 0.03  | 0.05  | 0.07  | 0.08  |
| VC2287 | 0.06  | 0.03  | 0.04  | 0.06  |
| VC2288 | 0.06  | 0.06  | 0.00  | 0.03  |
| VC2289 | 0.03  | 0.03  | 0.04  | 0.03  |
| VC2290 | 0.09  | 0.07  | 0.06  | 0.06  |
| VC2291 | 0.04  | 0.05  | 0.02  | 0.03  |
| VC2292 | 0.04  | 0.05  | 0.06  | 0.06  |
| VC2293 | 0.05  | 0.05  | 0.08  | 0.08  |
| VC2294 | 0.03  | 0.03  | 0.05  | 0.05  |
| VC2295 | 0.08  | 0.07  | 0.05  | 0.06  |
| VC2296 | 0.05  | 0.06  | 0.09  | 0.09  |
| VC2297 | 0.06  | 0.06  | 0.05  | 0.05  |
| VC2298 | 0.09  | 0.07  | 0.08  | 0.10  |
| VC2299 | 0.04  | 0.05  | 0.03  | 0.04  |
| VC2300 | 0.05  | 0.06  | 0.06  | 0.05  |
| VC2301 | 0.07  | 0.08  | 0.00  | 0.02  |
| VC2302 | 0.05  | 0.06  | 0.09  | 0.06  |
| VC2303 | 0.05  | 0.05  | 0.04  | 0.04  |
| VC2304 | 0.03  | 0.03  | 0.05  | 0.04  |
| VC2305 | 0.08  | 0.07  | 0.04  | 0.05  |
| VC2306 | 0.04  | 0.05  | 0.04  | 0.04  |
| VC2307 | 0.09  | 0.08  | 0.09  | 0.12  |
| VC2308 | 0.04  | 0.04  | 0.04  | 0.06  |
| VC2309 | 0.06  | 0.06  | 0.09  | 0.09  |
| VC2310 | 0.04  | 0.04  | 0.05  | 0.06  |
| VC2311 | 0.09  | 0.09  | 0.11  | 0.10  |
| VC2312 | 0.06  | 0.06  | 0.08  | 0.10  |
| VC2313 | 0.06  | 0.07  | 0.09  | 0.07  |
| VC2314 | 0.05  | 0.04  | 0.06  | 0.05  |
| VC2315 | 0.07  | 0.09  | 0.02  | 0.03  |
| VC2316 | 0.04  | 0.04  | 0.08  | 0.07  |
| VC2317 | 0.07  | 0.08  | 0.03  | 0.03  |
| VC2317 | 0.05  | 0.05  | 0.02  | 0.03  |
| VC2318 | 0.07  | 0.08  | 0.11  | 0.11  |
| VC2319 | -0.01 | -0.02 | 0.04  | 0.04  |
| VC2320 | 0.03  | 0.07  | 0.12  | 0.10  |
| VC2321 | 0.05  | 0.05  | 0.05  | 0.05  |
| VC2322 | 0.01  | 0.01  | 0.04  | 0.06  |
| VC2323 | 0.09  | 0.07  | 0.05  | 0.05  |
| VC2324 | 0.07  | 0.06  | 0.07  | 0.06  |
| VC2325 | 0.05  | 0.04  | 0.05  | 0.07  |
| VC2326 | 0.05  | 0.04  | 0.08  | 0.08  |

|          |       |      |      |      |
|----------|-------|------|------|------|
| VC2327   | 0.06  | 0.06 | 0.06 | 0.08 |
| VC2328   | 0.03  | 0.07 | 0.07 | 0.07 |
| VC2329   | 0.03  | 0.03 | 0.08 | 0.03 |
| VC2330   | 0.04  | 0.04 | 0.08 | 0.08 |
| VC2331   | 0.06  | 0.05 | 0.03 | 0.02 |
| VC2331   | 0.05  | 0.05 | 0.05 | 0.05 |
| VC2332   | 0.04  | 0.04 | 0.08 | 0.07 |
| VC2333   | 0.10  | 0.11 | 0.05 | 0.04 |
| VC2334   | 0.06  | 0.06 | 0.04 | 0.04 |
| VC2335   | 0.05  | 0.06 | 0.10 | 0.08 |
| VC2336   | 0.04  | 0.04 | 0.06 | 0.10 |
| VC2337   | 0.05  | 0.04 | 0.08 | 0.07 |
| VC2338   | 0.01  | 0.01 | 0.05 | 0.05 |
| VC2339   | 0.12  | 0.10 | 0.07 | 0.07 |
| VC2340   | 0.09  | 0.07 | 0.08 | 0.07 |
| VC2341   | 0.06  | 0.05 | 0.03 | 0.04 |
| VC2342   | 0.03  | 0.05 | 0.04 | 0.05 |
| VC2343   | 0.03  | 0.03 | 0.12 | 0.10 |
| VC2344   | 0.62  | 0.65 | 0.58 | 0.55 |
| VC2345   | 0.10  | 0.11 | 0.05 | 0.05 |
| VC2346   | 0.09  | 0.09 | 0.08 | 0.09 |
| VC2347   | 0.06  | 0.03 | 0.05 | 0.04 |
| VC2348   | 0.06  | 0.05 | 0.08 | 0.07 |
| VC2349   | 0.17  | 0.15 | 0.07 | 0.06 |
| VC2350   | 0.11  | 0.12 | 0.08 | 0.06 |
| VC2351   | 0.04  | 0.05 | 0.05 | 0.06 |
| VC2352   | 0.05  | 0.04 | 0.07 | 0.07 |
| VC2353   | 0.11  | 0.11 | 0.05 | 0.05 |
| VC2354   | 0.05  | 0.06 | 0.12 | 0.12 |
| VC2355   | 0.12  | 0.13 | 0.05 | 0.05 |
| VC2356   | 0.02  | 0.05 | 0.01 | 0.01 |
| VC2356   | -0.01 | 0.03 | 0.05 | 0.04 |
| VC2357   | 0.06  | 0.07 | 0.07 | 0.06 |
| VC2358   | 0.01  | 0.01 | 0.00 | 0.00 |
| VC2359   | 0.07  | 0.07 | 0.08 | 0.09 |
| VC2360   | 0.05  | 0.07 | 0.04 | 0.05 |
| VC2361   | 0.10  | 0.10 | 0.03 | 0.04 |
| VC2362   | 0.08  | 0.09 | 0.06 | 0.05 |
| VC2363   | 0.06  | 0.05 | 0.03 | 0.03 |
| VC2364   | 0.01  | 0.01 | 0.04 | 0.04 |
| VC2364.1 | 0.03  | 0.04 | 0.04 | 0.04 |
| VC2364.1 | 0.06  | 0.05 | 0.04 | 0.04 |
| VC2365   | 0.14  | 0.17 | 0.05 | 0.07 |

|        |      |      |       |      |
|--------|------|------|-------|------|
| VC2366 | 0.13 | 0.13 | 0.03  | 0.03 |
| VC2367 | 0.08 | 0.08 | 0.07  | 0.08 |
| VC2368 | 0.12 | 0.10 | 0.08  | 0.08 |
| VC2369 | 0.13 | 0.14 | 0.04  | 0.05 |
| VC2370 | 0.23 | 0.27 | 0.23  | 0.24 |
| VC2371 | 0.15 | 0.14 | 0.01  | 0.03 |
| VC2372 | 0.11 | 0.11 | 0.03  | 0.02 |
| VC2373 | 0.02 | 0.02 | 0.00  | 0.04 |
| VC2373 | 0.01 | 0.01 | 0.05  | 0.06 |
| VC2374 | 0.12 | 0.08 | 0.05  | 0.04 |
| VC2376 | 0.03 | 0.02 | 0.02  | 0.02 |
| VC2376 | 0.02 | 0.02 | 0.03  | 0.05 |
| VC2377 | 0.04 | 0.04 | 0.08  | 0.07 |
| VC2378 | 0.12 | 0.13 | 0.05  | 0.02 |
| VC2379 | 0.10 | 0.10 | 0.01  | 0.00 |
| VC2380 | 0.08 | 0.05 | 0.02  | 0.00 |
| VC2381 | 0.04 | 0.04 | 0.02  | 0.01 |
| VC2382 | 0.07 | 0.06 | 0.01  | 0.01 |
| VC2383 | 0.06 | 0.06 | 0.07  | 0.06 |
| VC2384 | 0.09 | 0.08 | 0.02  | 0.01 |
| VC2385 | 0.04 | 0.04 | 0.08  | 0.06 |
| VC2386 | 0.11 | 0.10 | 0.05  | 0.05 |
| VC2387 | 0.10 | 0.12 | 0.01  | 0.01 |
| VC2388 | 0.11 | 0.09 | 0.02  | 0.01 |
| VC2389 | 0.03 | 0.03 | 0.01  | 0.03 |
| VC2390 | 0.02 | 0.03 | 0.02  | 0.03 |
| VC2391 | 0.10 | 0.09 | 0.01  | 0.00 |
| VC2392 | 0.11 | 0.12 | 0.05  | 0.02 |
| VC2393 | 0.05 | 0.06 | 0.04  | 0.05 |
| VC2394 | 0.03 | 0.04 | 0.08  | 0.06 |
| VC2395 | 0.20 | 0.18 | -0.02 | 0.00 |
| VC2396 | 0.09 | 0.08 | 0.00  | 0.02 |
| VC2397 | 0.03 | 0.03 | 0.03  | 0.01 |
| VC2398 | 0.03 | 0.03 | 0.03  | 0.04 |
| VC2399 | 0.12 | 0.11 | 0.02  | 0.02 |
| VC2400 | 0.00 | 0.01 | 0.01  | 0.02 |
| VC2401 | 0.02 | 0.03 | 0.06  | 0.05 |
| VC2402 | 0.04 | 0.03 | 0.04  | 0.03 |
| VC2403 | 0.16 | 0.15 | 0.04  | 0.04 |
| VC2404 | 0.02 | 0.04 | 0.05  | 0.04 |
| VC2405 | 0.10 | 0.09 | 0.06  | 0.07 |
| VC2406 | 0.08 | 0.08 | 0.05  | 0.05 |
| VC2408 | 0.06 | 0.08 | 0.05  | 0.05 |



|        |      |      |       |      |
|--------|------|------|-------|------|
| VC2409 | 0.10 | 0.09 | -0.01 | 0.00 |
| VC2410 | 0.05 | 0.06 | 0.05  | 0.04 |
| VC2410 | 0.06 | 0.08 | 0.05  | 0.04 |
| VC2411 | 0.07 | 0.06 | 0.04  | 0.04 |
| VC2411 | 0.07 | 0.09 | 0.05  | 0.05 |
| VC2412 | 0.05 | 0.04 | 0.02  | 0.03 |
| VC2414 | 0.00 | 0.01 | 0.04  | 0.04 |
| VC2415 | 0.11 | 0.10 | 0.02  | 0.02 |
| VC2416 | 0.08 | 0.08 | 0.05  | 0.05 |
| VC2417 | 0.05 | 0.04 | 0.02  | 0.03 |
| VC2419 | 0.08 | 0.09 | 0.05  | 0.04 |
| VC2420 | 0.08 | 0.05 | 0.05  | 0.04 |
| VC2421 | 0.08 | 0.08 | 0.08  | 0.07 |
| VC2422 | 0.06 | 0.05 | 0.08  | 0.07 |
| VC2423 | 0.06 | 0.04 | 0.08  | 0.06 |
| VC2424 | 0.05 | 0.04 | 0.01  | 0.02 |
| VC2425 | 0.02 | 0.02 | 0.05  | 0.06 |
| VC2426 | 0.03 | 0.03 | 0.03  | 0.03 |
| VC2427 | 0.06 | 0.05 | 0.05  | 0.03 |
| VC2428 | 0.05 | 0.06 | 0.10  | 0.10 |
| VC2429 | 0.04 | 0.05 | 0.06  | 0.06 |
| VC2430 | 0.16 | 0.20 | 0.04  | 0.05 |
| VC2431 | 0.06 | 0.07 | 0.06  | 0.04 |
| VC2432 | 0.10 | 0.09 | 0.13  | 0.10 |
| VC2433 | 0.08 | 0.08 | 0.10  | 0.13 |
| VC2434 | 0.10 | 0.07 | 0.09  | 0.05 |
| VC2435 | 0.08 | 0.07 | 0.08  | 0.08 |
| VC2436 | 0.08 | 0.05 | 0.08  | 0.05 |
| VC2437 | 0.01 | 0.02 | 0.04  | 0.05 |
| VC2438 | 0.04 | 0.02 | 0.03  | 0.03 |
| VC2439 | 0.03 | 0.06 | 0.06  | 0.07 |
| VC2440 | 0.02 | 0.02 | 0.05  | 0.06 |
| VC2440 | 0.02 | 0.03 | 0.04  | 0.03 |
| VC2441 | 0.07 | 0.05 | 0.06  | 0.06 |
| VC2442 | 0.08 | 0.07 | 0.08  | 0.05 |
| VC2443 | 0.07 | 0.07 | 0.08  | 0.06 |
| VC2444 | 0.01 | 0.02 | 0.03  | 0.02 |
| VC2445 | 0.00 | 0.02 | 0.02  | 0.04 |
| VC2445 | 0.01 | 0.03 | 0.05  | 0.04 |
| VC2446 | 0.06 | 0.06 | 0.08  | 0.07 |
| VC2447 | 0.08 | 0.06 | 0.07  | 0.07 |
| VC2448 | 0.03 | 0.03 | 0.00  | 0.01 |
| VC2449 | 0.06 | 0.06 | 0.02  | 0.02 |

|        |       |      |       |      |
|--------|-------|------|-------|------|
| VC2450 | 0.04  | 0.04 | 0.03  | 0.05 |
| VC2451 | 0.03  | 0.04 | 0.05  | 0.06 |
| VC2452 | 0.10  | 0.11 | 0.05  | 0.05 |
| VC2453 | 0.05  | 0.06 | 0.03  | 0.03 |
| VC2454 | -0.01 | 0.00 | -0.01 | 0.00 |
| VC2455 | 0.11  | 0.10 | 0.05  | 0.06 |
| VC2456 | 0.06  | 0.07 | 0.06  | 0.06 |
| VC2457 | 0.03  | 0.04 | 0.06  | 0.05 |
| VC2458 | 0.05  | 0.06 | 0.12  | 0.09 |
| VC2459 | 0.01  | 0.01 | 0.10  | 0.08 |
| VC2460 | 0.07  | 0.06 | 0.05  | 0.04 |
| VC2461 | 0.08  | 0.08 | 0.10  | 0.08 |
| VC2462 | 0.05  | 0.06 | 0.05  | 0.05 |
| VC2463 | 0.04  | 0.03 | 0.06  | 0.04 |
| VC2464 | 0.01  | 0.01 | 0.10  | 0.09 |
| VC2465 | 0.00  | 0.00 | 0.02  | 0.01 |
| VC2466 | 0.02  | 0.02 | 0.07  | 0.05 |
| VC2467 | 0.06  | 0.06 | 0.05  | 0.05 |
| VC2468 | 0.04  | 0.03 | 0.07  | 0.04 |
| VC2469 | 0.04  | 0.05 | 0.07  | 0.05 |
| VC2470 | 0.03  | 0.03 | 0.03  | 0.04 |
| VC2471 | 0.07  | 0.06 | 0.03  | 0.03 |
| VC2472 | 0.02  | 0.04 | 0.05  | 0.07 |
| VC2473 | 0.07  | 0.08 | 0.03  | 0.03 |
| VC2474 | 0.03  | 0.04 | 0.06  | 0.05 |
| VC2475 | 0.05  | 0.04 | 0.03  | 0.05 |
| VC2476 | 0.06  | 0.05 | 0.02  | 0.04 |
| VC2478 | 0.04  | 0.06 | 0.05  | 0.07 |
| VC2479 | 0.05  | 0.04 | 0.06  | 0.04 |
| VC2480 | 0.05  | 0.05 | 0.09  | 0.11 |
| VC2481 | 0.05  | 0.03 | 0.03  | 0.05 |
| VC2482 | 0.04  | 0.03 | 0.06  | 0.07 |
| VC2483 | 0.06  | 0.08 | 0.06  | 0.05 |
| VC2484 | 0.06  | 0.07 | 0.05  | 0.05 |
| VC2485 | 0.05  | 0.04 | 0.05  | 0.04 |
| VC2486 | 0.04  | 0.04 | 0.08  | 0.08 |
| VC2487 | 0.05  | 0.06 | 0.03  | 0.03 |
| VC2488 | 0.09  | 0.08 | 0.03  | 0.09 |
| VC2489 | 0.03  | 0.04 | 0.03  | 0.04 |
| VC2490 | 0.04  | 0.04 | 0.05  | 0.07 |
| VC2491 | 0.04  | 0.03 | 0.06  | 0.04 |
| VC2492 | 0.09  | 0.07 | 0.06  | 0.07 |
| VC2493 | 0.16  | 0.04 | 0.05  | 0.05 |

|        |      |      |      |      |
|--------|------|------|------|------|
| VC2494 | 0.03 | 0.03 | 0.03 | 0.03 |
| VC2495 | 0.05 | 0.05 | 0.07 | 0.08 |
| VC2496 | 0.04 | 0.05 | 0.07 | 0.07 |
| VC2497 | 0.03 | 0.03 | 0.08 | 0.07 |
| VC2498 | 0.01 | 0.02 | 0.03 | 0.03 |
| VC2499 | 0.03 | 0.02 | 0.06 | 0.03 |
| VC2500 | 0.02 | 0.03 | 0.01 | 0.00 |
| VC2501 | 0.03 | 0.04 | 0.09 | 0.09 |
| VC2502 | 0.04 | 0.05 | 0.07 | 0.07 |
| VC2503 | 0.05 | 0.06 | 0.05 | 0.05 |
| VC2504 | 0.05 | 0.05 | 0.09 | 0.08 |
| VC2505 | 0.07 | 0.06 | 0.05 | 0.03 |
| VC2506 | 0.02 | 0.02 | 0.06 | 0.07 |
| VC2507 | 0.02 | 0.01 | 0.04 | 0.04 |
| VC2508 | 0.07 | 0.07 | 0.07 | 0.06 |
| VC2509 | 0.06 | 0.06 | 0.04 | 0.03 |
| VC2511 | 0.08 | 0.09 | 0.06 | 0.06 |
| VC2512 | 0.06 | 0.07 | 0.07 | 0.06 |
| VC2513 | 0.12 | 0.11 | 0.06 | 0.07 |
| VC2514 | 0.09 | 0.09 | 0.12 | 0.12 |
| VC2515 | 0.07 | 0.08 | 0.05 | 0.05 |
| VC2516 | 0.05 | 0.06 | 0.04 | 0.03 |
| VC2517 | 0.05 | 0.05 | 0.09 | 0.08 |
| VC2518 | 0.06 | 0.05 | 0.03 | 0.03 |
| VC2519 | 0.03 | 0.01 | 0.04 | 0.05 |
| VC2520 | 0.07 | 0.07 | 0.05 | 0.06 |
| VC2521 | 0.03 | 0.03 | 0.04 | 0.05 |
| VC2522 | 0.05 | 0.05 | 0.06 | 0.07 |
| VC2523 | 0.07 | 0.05 | 0.02 | 0.03 |
| VC2524 | 0.04 | 0.04 | 0.03 | 0.03 |
| VC2525 | 0.04 | 0.08 | 0.03 | 0.05 |
| VC2527 | 0.02 | 0.00 | 0.05 | 0.04 |
| VC2528 | 0.06 | 0.06 | 0.04 | 0.03 |
| VC2529 | 0.14 | 0.11 | 0.21 | 0.12 |
| VC2530 | 0.09 | 0.09 | 0.06 | 0.03 |
| VC2531 | 0.07 | 0.04 | 0.05 | 0.06 |
| VC2532 | 0.06 | 0.09 | 0.06 | 0.06 |
| VC2534 | 0.04 | 0.02 | 0.05 | 0.05 |
| VC2535 | 0.03 | 0.03 | 0.05 | 0.05 |
| VC2536 | 0.07 | 0.08 | 0.04 | 0.03 |
| VC2537 | 0.06 | 0.04 | 0.05 | 0.12 |
| VC2538 | 0.04 | 0.05 | 0.09 | 0.05 |
| VC2539 | 0.07 | 0.05 | 0.08 | 0.09 |

|        |      |      |      |      |
|--------|------|------|------|------|
| VC2540 | 0.05 | 0.09 | 0.05 | 0.06 |
| VC2541 | 0.05 | 0.05 | 0.05 | 0.06 |
| VC2542 | 0.05 | 0.05 | 0.05 | 0.05 |
| VC2543 | 0.05 | 0.06 | 0.07 | 0.06 |
| VC2544 | 0.07 | 0.05 | 0.08 | 0.07 |
| VC2545 | 0.07 | 0.05 | 0.08 | 0.09 |
| VC2546 | 0.07 | 0.07 | 0.05 | 0.03 |
| VC2547 | 0.05 | 0.05 | 0.04 | 0.04 |
| VC2547 | 0.01 | 0.04 | 0.04 | 0.03 |
| VC2548 | 0.03 | 0.02 | 0.05 | 0.06 |
| VC2549 | 0.04 | 0.03 | 0.08 | 0.09 |
| VC2551 | 0.07 | 0.06 | 0.04 | 0.03 |
| VC2552 | 0.08 | 0.09 | 0.05 | 0.07 |
| VC2553 | 0.09 | 0.10 | 0.07 | 0.05 |
| VC2554 | 0.03 | 0.03 | 0.06 | 0.07 |
| VC2555 | 0.02 | 0.02 | 0.03 | 0.04 |
| VC2557 | 0.06 | 0.05 | 0.03 | 0.03 |
| VC2558 | 0.04 | 0.05 | 0.05 | 0.04 |
| VC2559 | 0.04 | 0.04 | 0.02 | 0.02 |
| VC2560 | 0.02 | 0.03 | 0.04 | 0.04 |
| VC2561 | 0.04 | 0.04 | 0.03 | 0.04 |
| VC2562 | 0.02 | 0.03 | 0.03 | 0.04 |
| VC2563 | 0.03 | 0.04 | 0.06 | 0.06 |
| VC2564 | 0.05 | 0.05 | 0.04 | 0.04 |
| VC2565 | 0.05 | 0.06 | 0.06 | 0.05 |
| VC2566 | 0.02 | 0.02 | 0.05 | 0.03 |
| VC2567 | 0.03 | 0.05 | 0.04 | 0.04 |
| VC2568 | 0.06 | 0.05 | 0.08 | 0.09 |
| VC2569 | 0.06 | 0.06 | 0.05 | 0.05 |
| VC2570 | 0.02 | 0.02 | 0.07 | 0.13 |
| VC2571 | 0.04 | 0.05 | 0.06 | 0.04 |
| VC2572 | 0.03 | 0.04 | 0.02 | 0.02 |
| VC2573 | 0.02 | 0.03 | 0.02 | 0.02 |
| VC2574 | 0.07 | 0.06 | 0.07 | 0.06 |
| VC2575 | 0.06 | 0.07 | 0.06 | 0.08 |
| VC2576 | 0.04 | 0.05 | 0.04 | 0.04 |
| VC2578 | 0.08 | 0.08 | 0.06 | 0.07 |
| VC2579 | 0.03 | 0.03 | 0.08 | 0.05 |
| VC2580 | 0.07 | 0.07 | 0.05 | 0.05 |
| VC2581 | 0.02 | 0.03 | 0.07 | 0.07 |
| VC2582 | 0.03 | 0.03 | 0.04 | 0.04 |
| VC2583 | 0.05 | 0.06 | 0.09 | 0.09 |
| VC2584 | 0.03 | 0.04 | 0.03 | 0.03 |

|        |       |      |      |      |
|--------|-------|------|------|------|
| VC2585 | 0.02  | 0.03 | 0.01 | 0.02 |
| VC2586 | 0.02  | 0.02 | 0.07 | 0.05 |
| VC2587 | 0.08  | 0.07 | 0.07 | 0.07 |
| VC2588 | 0.09  | 0.06 | 0.04 | 0.04 |
| VC2589 | 0.11  | 0.12 | 0.05 | 0.07 |
| VC2590 | 0.05  | 0.06 | 0.03 | 0.04 |
| VC2591 | 0.03  | 0.05 | 0.04 | 0.06 |
| VC2592 | 0.04  | 0.04 | 0.05 | 0.06 |
| VC2593 | 0.00  | 0.02 | 0.03 | 0.04 |
| VC2594 | 0.03  | 0.02 | 0.04 | 0.07 |
| VC2595 | 0.04  | 0.05 | 0.02 | 0.04 |
| VC2596 | 0.02  | 0.02 | 0.06 | 0.01 |
| VC2597 | 0.04  | 0.03 | 0.01 | 0.01 |
| VC2598 | 0.00  | 0.02 | 0.04 | 0.08 |
| VC2599 | 0.05  | 0.05 | 0.08 | 0.07 |
| VC2600 | 0.06  | 0.05 | 0.02 | 0.03 |
| VC2601 | 0.05  | 0.06 | 0.03 | 0.05 |
| VC2602 | 0.04  | 0.06 | 0.04 | 0.04 |
| VC2603 | 0.01  | 0.01 | 0.06 | 0.05 |
| VC2604 | -0.01 | 0.01 | 0.04 | 0.09 |
| VC2605 | 0.08  | 0.09 | 0.08 | 0.07 |
| VC2606 | 0.04  | 0.09 | 0.08 | 0.08 |
| VC2607 | 0.06  | 0.07 | 0.05 | 0.05 |
| VC2608 | 0.05  | 0.03 | 0.03 | 0.02 |
| VC2609 | 0.07  | 0.05 | 0.04 | 0.07 |
| VC2610 | 0.05  | 0.05 | 0.05 | 0.03 |
| VC2611 | 0.05  | 0.05 | 0.05 | 0.05 |
| VC2612 | 0.07  | 0.07 | 0.07 | 0.06 |
| VC2613 | 0.05  | 0.06 | 0.05 | 0.04 |
| VC2614 | 0.07  | 0.06 | 0.05 | 0.04 |
| VC2615 | 0.08  | 0.06 | 0.07 | 0.07 |
| VC2616 | 0.07  | 0.06 | 0.07 | 0.06 |
| VC2617 | 0.04  | 0.04 | 0.06 | 0.05 |
| VC2618 | 0.03  | 0.03 | 0.09 | 0.10 |
| VC2619 | 0.05  | 0.05 | 0.05 | 0.05 |
| VC2620 | 0.02  | 0.03 | 0.04 | 0.04 |
| VC2621 | 0.01  | 0.02 | 0.06 | 0.06 |
| VC2622 | 0.04  | 0.05 | 0.03 | 0.04 |
| VC2623 | 0.05  | 0.05 | 0.06 | 0.02 |
| VC2624 | 0.06  | 0.05 | 0.05 | 0.04 |
| VC2625 | 0.04  | 0.03 | 0.09 | 0.08 |
| VC2626 | 0.09  | 0.08 | 0.07 | 0.05 |
| VC2627 | 0.04  | 0.03 | 0.02 | 0.02 |

|        |      |      |      |      |
|--------|------|------|------|------|
| VC2628 | 0.06 | 0.05 | 0.05 | 0.06 |
| VC2629 | 0.03 | 0.03 | 0.06 | 0.05 |
| VC2631 | 0.08 | 0.06 | 0.10 | 0.09 |
| VC2632 | 0.02 | 0.01 | 0.05 | 0.04 |
| VC2633 | 0.03 | 0.03 | 0.03 | 0.04 |
| VC2634 | 0.03 | 0.05 | 0.05 | 0.05 |
| VC2635 | 0.04 | 0.05 | 0.04 | 0.04 |
| VC2636 | 0.01 | 0.00 | 0.01 | 0.04 |
| VC2637 | 0.01 | 0.04 | 0.04 | 0.07 |
| VC2638 | 0.05 | 0.05 | 0.12 | 0.13 |
| VC2639 | 0.11 | 0.08 | 0.04 | 0.02 |
| VC2640 | 0.07 | 0.07 | 0.04 | 0.04 |
| VC2641 | 0.03 | 0.04 | 0.04 | 0.06 |
| VC2642 | 0.05 | 0.04 | 0.16 | 0.17 |
| VC2643 | 0.01 | 0.01 | 0.04 | 0.03 |
| VC2644 | 0.06 | 0.06 | 0.05 | 0.05 |
| VC2645 | 0.04 | 0.04 | 0.06 | 0.05 |
| VC2646 | 0.04 | 0.05 | 0.05 | 0.05 |
| VC2647 | 0.03 | 0.05 | 0.06 | 0.03 |
| VC2648 | 0.10 | 0.07 | 0.01 | 0.04 |
| VC2649 | 0.10 | 0.08 | 0.02 | 0.02 |
| VC2650 | 0.05 | 0.05 | 0.10 | 0.10 |
| VC2651 | 0.03 | 0.04 | 0.07 | 0.05 |
| VC2652 | 0.08 | 0.06 | 0.06 | 0.04 |
| VC2653 | 0.04 | 0.03 | 0.11 | 0.14 |
| VC2654 | 0.00 | 0.00 | 0.08 | 0.05 |
| VC2655 | 0.03 | 0.04 | 0.05 | 0.03 |
| VC2656 | 0.02 | 0.00 | 0.06 | 0.07 |
| VC2657 | 0.06 | 0.05 | 0.06 | 0.07 |
| VC2658 | 0.03 | 0.02 | 0.04 | 0.07 |
| VC2659 | 0.05 | 0.05 | 0.05 | 0.04 |
| VC2660 | 0.05 | 0.05 | 0.09 | 0.05 |
| VC2661 | 0.01 | 0.01 | 0.05 | 0.06 |
| VC2662 | 0.01 | 0.01 | 0.05 | 0.07 |
| VC2663 | 0.08 | 0.05 | 0.04 | 0.05 |
| VC2664 | 0.06 | 0.06 | 0.06 | 0.06 |
| VC2665 | 0.07 | 0.08 | 0.05 | 0.07 |
| VC2666 | 0.05 | 0.05 | 0.07 | 0.03 |
| VC2667 | 0.03 | 0.04 | 0.04 | 0.03 |
| VC2668 | 0.03 | 0.04 | 0.05 | 0.04 |
| VC2669 | 0.05 | 0.04 | 0.07 | 0.06 |
| VC2670 | 0.04 | 0.04 | 0.01 | 0.01 |
| VC2671 | 0.04 | 0.05 | 0.06 | 0.05 |

|        |       |       |      |      |
|--------|-------|-------|------|------|
| VC2672 | 0.05  | 0.05  | 0.08 | 0.07 |
| VC2673 | 0.00  | 0.01  | 0.05 | 0.05 |
| VC2674 | 0.05  | 0.06  | 0.06 | 0.05 |
| VC2675 | 0.02  | 0.02  | 0.07 | 0.08 |
| VC2676 | 0.02  | 0.02  | 0.04 | 0.04 |
| VC2677 | 0.06  | 0.06  | 0.09 | 0.07 |
| VC2678 | 0.10  | 0.11  | 0.05 | 0.04 |
| VC2679 | 0.03  | 0.03  | 0.05 | 0.05 |
| VC2680 | 0.05  | 0.05  | 0.07 | 0.03 |
| VC2680 | 0.06  | 0.07  | 0.03 | 0.04 |
| VC2681 | 0.04  | 0.05  | 0.05 | 0.04 |
| VC2682 | 0.04  | 0.04  | 0.07 | 0.09 |
| VC2683 | 0.04  | 0.05  | 0.04 | 0.05 |
| VC2684 | 0.03  | 0.06  | 0.03 | 0.06 |
| VC2685 | 0.06  | 0.07  | 0.06 | 0.06 |
| VC2686 | 0.04  | 0.04  | 0.09 | 0.07 |
| VC2687 | 0.06  | 0.08  | 0.05 | 0.05 |
| VC2688 | 0.04  | 0.04  | 0.06 | 0.03 |
| VC2689 | 0.06  | 0.07  | 0.03 | 0.06 |
| VC2690 | 0.10  | 0.11  | 0.05 | 0.05 |
| VC2691 | 0.05  | 0.04  | 0.07 | 0.07 |
| VC2692 | 0.05  | 0.07  | 0.07 | 0.08 |
| VC2693 | 0.00  | 0.03  | 0.06 | 0.06 |
| VC2694 | 0.04  | 0.05  | 0.06 | 0.05 |
| VC2695 | 0.05  | 0.06  | 0.09 | 0.08 |
| VC2696 | 0.05  | 0.03  | 0.03 | 0.03 |
| VC2697 | 0.00  | 0.01  | 0.01 | 0.00 |
| VC2698 | 0.05  | 0.05  | 0.04 | 0.06 |
| VC2699 | 0.04  | 0.03  | 0.03 | 0.04 |
| VC2700 | 0.05  | 0.05  | 0.04 | 0.04 |
| VC2701 | 0.04  | 0.05  | 0.04 | 0.05 |
| VC2702 | 0.05  | 0.04  | 0.11 | 0.08 |
| VC2703 | 0.02  | 0.01  | 0.04 | 0.05 |
| VC2704 | 0.06  | 0.06  | 0.02 | 0.04 |
| VC2705 | -0.01 | -0.01 | 0.05 | 0.04 |
| VC2706 | 0.01  | 0.00  | 0.07 | 0.05 |
| VC2708 | 0.02  | 0.01  | 0.04 | 0.06 |
| VC2709 | 0.06  | 0.06  | 0.06 | 0.05 |
| VC2710 | 0.05  | 0.05  | 0.06 | 0.07 |
| VC2711 | 0.10  | 0.06  | 0.06 | 0.07 |
| VC2712 | 0.01  | 0.03  | 0.04 | 0.05 |
| VC2713 | 0.04  | 0.04  | 0.08 | 0.05 |
| VC2714 | 0.02  | 0.05  | 0.06 | 0.04 |

|        |       |      |      |       |
|--------|-------|------|------|-------|
| VC2715 | 0.05  | 0.03 | 0.05 | 0.05  |
| VC2716 | 0.09  | 0.07 | 0.07 | 0.06  |
| VC2717 | 0.01  | 0.02 | 0.06 | 0.06  |
| VC2718 | 0.08  | 0.08 | 0.02 | 0.01  |
| VC2719 | 0.01  | 0.01 | 0.10 | 0.10  |
| VC2720 | 0.05  | 0.06 | 0.06 | 0.05  |
| VC2721 | 0.03  | 0.03 | 0.04 | 0.05  |
| VC2722 | 0.02  | 0.06 | 0.06 | 0.05  |
| VC2723 | 0.02  | 0.05 | 0.05 | 0.06  |
| VC2724 | 0.02  | 0.03 | 0.00 | 0.00  |
| VC2725 | 0.08  | 0.09 | 0.04 | 0.06  |
| VC2726 | 0.11  | 0.08 | 0.04 | 0.05  |
| VC2727 | 0.03  | 0.03 | 0.05 | 0.05  |
| VC2728 | 0.05  | 0.06 | 0.06 | 0.07  |
| VC2729 | 0.04  | 0.05 | 0.04 | 0.04  |
| VC2730 | 0.04  | 0.04 | 0.06 | 0.03  |
| VC2731 | 0.04  | 0.05 | 0.04 | 0.04  |
| VC2732 | 0.05  | 0.06 | 0.04 | 0.03  |
| VC2733 | 0.03  | 0.03 | 0.03 | 0.02  |
| VC2734 | 0.02  | 0.03 | 0.04 | 0.04  |
| VC2735 | 0.04  | 0.04 | 0.07 | 0.07  |
| VC2736 | 0.03  | 0.04 | 0.05 | 0.04  |
| VC2737 | 0.08  | 0.08 | 0.01 | 0.05  |
| VC2738 | 0.05  | 0.06 | 0.04 | 0.05  |
| VC2739 | 0.03  | 0.03 | 0.03 | 0.07  |
| VC2740 | 0.08  | 0.09 | 0.06 | 0.08  |
| VC2741 | 0.05  | 0.05 | 0.03 | 0.03  |
| VC2742 | 0.03  | 0.04 | 0.05 | 0.05  |
| VC2743 | 0.04  | 0.09 | 0.06 | 0.07  |
| VC2744 | 0.07  | 0.08 | 0.06 | 0.04  |
| VC2745 | 0.05  | 0.04 | 0.04 | 0.04  |
| VC2746 | 0.06  | 0.06 | 0.04 | 0.04  |
| VC2747 | 0.05  | 0.05 | 0.04 | 0.04  |
| VC2748 | 0.00  | 0.03 | 0.05 | 0.08  |
| VC2749 | 0.06  | 0.07 | 0.07 | 0.05  |
| VC2750 | -0.01 | 0.00 | 0.03 | 0.03  |
| VC2751 | 0.04  | 0.03 | 0.04 | 0.05  |
| VC2752 | 0.06  | 0.05 | 0.06 | 0.06  |
| VC2754 | 0.06  | 0.07 | 0.06 | -0.04 |
| VC2755 | 0.05  | 0.05 | 0.07 | 0.07  |
| VC2756 | 0.07  | 0.06 | 0.00 | 0.01  |
| VC2757 | 0.08  | 0.06 | 0.01 | 0.01  |
| VC2758 | 0.08  | 0.07 | 0.08 | 0.07  |



|         |      |      |      |       |
|---------|------|------|------|-------|
| VC2759  | 0.02 | 0.02 | 0.00 | 0.02  |
| VC2760  | 0.03 | 0.03 | 0.07 | 0.06  |
| VC2761  | 0.02 | 0.02 | 0.04 | 0.05  |
| VC2762  | 0.10 | 0.09 | 0.06 | 0.08  |
| VC2763  | 0.03 | 0.03 | 0.08 | 0.06  |
| VC2764  | 0.03 | 0.01 | 0.00 | -0.01 |
| VC2765  | 0.02 | 0.03 | 0.06 | 0.05  |
| VC2767  | 0.04 | 0.04 | 0.03 | 0.02  |
| VC2768  | 0.04 | 0.03 | 0.00 | 0.01  |
| VC2769  | 0.09 | 0.03 | 0.07 | 0.07  |
| VC2770  | 0.08 | 0.04 | 0.04 | 0.03  |
| VC2771  | 0.05 | 0.05 | 0.05 | 0.05  |
| VC2772  | 0.05 | 0.07 | 0.10 | 0.10  |
| VC2773  | 0.02 | 0.03 | 0.04 | 0.08  |
| VC2774  | 0.03 | 0.03 | 0.05 | 0.06  |
| VC2775  | 0.04 | 0.03 | 0.06 | 0.07  |
| VCA0001 | 0.10 | 0.05 | 0.05 | 0.04  |
| VCA0002 | 0.02 | 0.02 | 0.04 | 0.04  |
| VCA0003 | 0.05 | 0.03 | 0.07 | 0.08  |
| VCA0004 | 0.03 | 0.04 | 0.06 | 0.07  |
| VCA0005 | 0.02 | 0.03 | 0.07 | 0.07  |
| VCA0006 | 0.03 | 0.03 | 0.02 | 0.02  |
| VCA0007 | 0.03 | 0.04 | 0.11 | 0.08  |
| VCA0008 | 0.04 | 0.04 | 0.02 | 0.02  |
| VCA0009 | 0.03 | 0.03 | 0.03 | 0.04  |
| VCA0010 | 0.04 | 0.03 | 0.03 | 0.02  |
| VCA0011 | 0.02 | 0.04 | 0.05 | 0.05  |
| VCA0012 | 0.06 | 0.06 | 0.05 | 0.05  |
| VCA0013 | 0.01 | 0.04 | 0.06 | 0.06  |
| VCA0014 | 0.04 | 0.04 | 0.06 | 0.06  |
| VCA0016 | 0.11 | 0.05 | 0.04 | 0.05  |
| VCA0017 | 0.05 | 0.06 | 0.06 | 0.07  |
| VCA0018 | 0.03 | 0.04 | 0.05 | 0.04  |
| VCA0019 | 0.00 | 0.02 | 0.06 | 0.08  |
| VCA0020 | 0.05 | 0.05 | 0.05 | 0.04  |
| VCA0021 | 0.03 | 0.02 | 0.04 | 0.03  |
| VCA0022 | 0.03 | 0.01 | 0.03 | 0.04  |
| VCA0023 | 0.03 | 0.03 | 0.13 | 0.11  |
| VCA0024 | 0.03 | 0.01 | 0.03 | 0.03  |
| VCA0025 | 0.02 | 0.02 | 0.02 | 0.03  |
| VCA0026 | 0.02 | 0.03 | 0.07 | 0.06  |
| VCA0027 | 0.07 | 0.05 | 0.07 | 0.06  |
| VCA0028 | 0.04 | 0.09 | 0.05 | 0.05  |

|         |      |      |      |      |
|---------|------|------|------|------|
| VCA0029 | 0.04 | 0.06 | 0.08 | 0.09 |
| VCA0030 | 0.06 | 0.07 | 0.02 | 0.07 |
| VCA0031 | 0.08 | 0.09 | 0.03 | 0.03 |
| VCA0032 | 0.05 | 0.07 | 0.07 | 0.06 |
| VCA0033 | 0.04 | 0.06 | 0.05 | 0.04 |
| VCA0034 | 0.03 | 0.05 | 0.04 | 0.06 |
| VCA0035 | 0.06 | 0.09 | 0.06 | 0.06 |
| VCA0036 | 0.15 | 0.15 | 0.09 | 0.05 |
| VCA0037 | 0.09 | 0.12 | 0.06 | 0.07 |
| VCA0038 | 0.04 | 0.05 | 0.05 | 0.04 |
| VCA0039 | 0.03 | 0.08 | 0.04 | 0.06 |
| VCA0040 | 0.06 | 0.08 | 0.06 | 0.06 |
| VCA0041 | 0.06 | 0.06 | 0.05 | 0.05 |
| VCA0042 | 0.58 | 0.62 | 0.49 | 0.55 |
| VCA0043 | 0.05 | 0.06 | 0.08 | 0.08 |
| VCA0044 | 0.03 | 0.07 | 0.04 | 0.05 |
| VCA0046 | 0.03 | 0.04 | 0.06 | 0.06 |
| VCA0047 | 0.08 | 0.08 | 0.07 | 0.05 |
| VCA0048 | 0.06 | 0.12 | 0.04 | 0.04 |
| VCA0049 | 0.04 | 0.04 | 0.02 | 0.00 |
| VCA0050 | 0.11 | 0.08 | 0.04 | 0.04 |
| VCA0051 | 0.02 | 0.01 | 0.06 | 0.08 |
| VCA0052 | 0.04 | 0.04 | 0.04 | 0.05 |
| VCA0053 | 0.04 | 0.07 | 0.06 | 0.07 |
| VCA0054 | 0.03 | 0.05 | 0.08 | 0.07 |
| VCA0055 | 0.05 | 0.06 | 0.08 | 0.06 |
| VCA0056 | 0.05 | 0.08 | 0.06 | 0.05 |
| VCA0057 | 0.10 | 0.10 | 0.11 | 0.11 |
| VCA0058 | 0.07 | 0.08 | 0.07 | 0.05 |
| VCA0060 | 0.06 | 0.09 | 0.04 | 0.04 |
| VCA0061 | 0.04 | 0.04 | 0.06 | 0.06 |
| VCA0062 | 0.04 | 0.05 | 0.04 | 0.03 |
| VCA0062 | 0.04 | 0.04 | 0.06 | 0.06 |
| VCA0063 | 0.06 | 0.09 | 0.03 | 0.03 |
| VCA0064 | 0.03 | 0.03 | 0.05 | 0.06 |
| VCA0065 | 0.06 | 0.05 | 0.05 | 0.04 |
| VCA0066 | 0.05 | 0.04 | 0.04 | 0.04 |
| VCA0067 | 0.04 | 0.05 | 0.07 | 0.05 |
| VCA0068 | 0.03 | 0.03 | 0.06 | 0.05 |
| VCA0069 | 0.06 | 0.07 | 0.02 | 0.03 |
| VCA0069 | 0.05 | 0.06 | 0.05 | 0.05 |
| VCA0070 | 0.04 | 0.05 | 0.09 | 0.07 |
| VCA0071 | 0.15 | 0.13 | 0.19 | 0.22 |

|         |      |      |       |       |
|---------|------|------|-------|-------|
| VCA0072 | 0.07 | 0.07 | 0.11  | 0.09  |
| VCA0073 | 0.06 | 0.05 | 0.09  | 0.04  |
| VCA0074 | 0.00 | 0.02 | 0.06  | 0.01  |
| VCA0075 | 0.02 | 0.02 | 0.05  | 0.05  |
| VCA0076 | 0.03 | 0.03 | 0.02  | 0.05  |
| VCA0077 | 0.04 | 0.03 | 0.03  | 0.03  |
| VCA0078 | 0.04 | 0.05 | 0.02  | 0.01  |
| VCA0079 | 0.06 | 0.06 | 0.07  | -0.04 |
| VCA0080 | 0.13 | 0.14 | -0.01 | -0.01 |
| VCA0081 | 0.06 | 0.06 | 0.04  | 0.04  |
| VCA0082 | 0.09 | 0.08 | 0.09  | 0.08  |
| VCA0083 | 0.06 | 0.05 | 0.09  | 0.06  |
| VCA0084 | 0.07 | 0.06 | 0.11  | 0.08  |
| VCA0085 | 0.07 | 0.06 | 0.11  | 0.05  |
| VCA0086 | 0.06 | 0.06 | 0.12  | 0.10  |
| VCA0087 | 0.07 | 0.06 | 0.05  | 0.04  |
| VCA0089 | 0.05 | 0.05 | 0.03  | 0.04  |
| VCA0090 | 0.03 | 0.03 | 0.04  | 0.04  |
| VCA0091 | 0.07 | 0.07 | 0.12  | 0.09  |
| VCA0092 | 0.07 | 0.08 | 0.09  | 0.09  |
| VCA0093 | 0.06 | 0.10 | 0.07  | 0.06  |
| VCA0093 | 0.06 | 0.07 | 0.04  | 0.05  |
| VCA0094 | 0.07 | 0.07 | 0.10  | 0.12  |
| VCA0095 | 0.06 | 0.06 | 0.08  | 0.06  |
| VCA0096 | 0.02 | 0.01 | 0.09  | 0.09  |
| VCA0097 | 0.06 | 0.10 | 0.06  | 0.05  |
| VCA0098 | 0.04 | 0.04 | 0.03  | 0.03  |
| VCA0099 | 0.07 | 0.06 | 0.12  | 0.09  |
| VCA0100 | 0.05 | 0.06 | 0.09  | 0.08  |
| VCA0101 | 0.07 | 0.05 | 0.04  | 0.08  |
| VCA0102 | 0.05 | 0.06 | 0.06  | 0.05  |
| VCA0103 | 0.04 | 0.03 | 0.02  | 0.05  |
| VCA0104 | 0.07 | 0.06 | 0.04  | 0.08  |
| VCA0105 | 0.05 | 0.07 | 0.10  | 0.08  |
| VCA0106 | 0.03 | 0.03 | 0.05  | 0.04  |
| VCA0107 | 0.06 | 0.06 | 0.12  | 0.08  |
| VCA0108 | 0.02 | 0.06 | 0.05  | 0.04  |
| VCA0109 | 0.07 | 0.06 | 0.09  | 0.09  |
| VCA0110 | 0.04 | 0.03 | 0.03  | 0.05  |
| VCA0111 | 0.03 | 0.05 | 0.09  | 0.06  |
| VCA0112 | 0.04 | 0.05 | 0.06  | 0.06  |
| VCA0113 | 0.06 | 0.05 | 0.05  | 0.10  |
| VCA0114 | 0.06 | 0.06 | 0.16  | 0.09  |

|         |      |      |      |      |
|---------|------|------|------|------|
| VCA0115 | 0.03 | 0.04 | 0.01 | 0.02 |
| VCA0116 | 0.13 | 0.09 | 0.05 | 0.06 |
| VCA0117 | 0.08 | 0.08 | 0.04 | 0.08 |
| VCA0118 | 0.04 | 0.05 | 0.09 | 0.06 |
| VCA0119 | 0.03 | 0.04 | 0.07 | 0.07 |
| VCA0120 | 0.03 | 0.03 | 0.06 | 0.06 |
| VCA0121 | 0.05 | 0.06 | 0.12 | 0.06 |
| VCA0122 | 0.06 | 0.05 | 0.12 | 0.10 |
| VCA0123 | 0.05 | 0.04 | 0.04 | 0.04 |
| VCA0124 | 0.05 | 0.06 | 0.15 | 0.13 |
| VCA0125 | 0.07 | 0.07 | 0.14 | 0.09 |
| VCA0126 | 0.07 | 0.07 | 0.09 | 0.07 |
| VCA0127 | 0.04 | 0.04 | 0.04 | 0.05 |
| VCA0128 | 0.03 | 0.03 | 0.06 | 0.04 |
| VCA0129 | 0.03 | 0.03 | 0.06 | 0.06 |
| VCA0130 | 0.06 | 0.09 | 0.07 | 0.07 |
| VCA0131 | 0.05 | 0.05 | 0.06 | 0.06 |
| VCA0132 | 0.06 | 0.08 | 0.08 | 0.07 |
| VCA0133 | 0.03 | 0.03 | 0.03 | 0.04 |
| VCA0134 | 0.01 | 0.02 | 0.04 | 0.04 |
| VCA0135 | 0.08 | 0.09 | 0.05 | 0.05 |
| VCA0136 | 0.03 | 0.08 | 0.05 | 0.03 |
| VCA0137 | 0.01 | 0.02 | 0.06 | 0.01 |
| VCA0138 | 0.08 | 0.09 | 0.03 | 0.03 |
| VCA0139 | 0.06 | 0.06 | 0.10 | 0.09 |
| VCA0140 | 0.04 | 0.07 | 0.08 | 0.07 |
| VCA0141 | 0.01 | 0.01 | 0.05 | 0.05 |
| VCA0142 | 0.06 | 0.06 | 0.04 | 0.05 |
| VCA0143 | 0.07 | 0.07 | 0.05 | 0.04 |
| VCA0144 | 0.03 | 0.05 | 0.06 | 0.05 |
| VCA0145 | 0.05 | 0.05 | 0.04 | 0.05 |
| VCA0146 | 0.01 | 0.00 | 0.03 | 0.04 |
| VCA0147 | 0.05 | 0.07 | 0.07 | 0.09 |
| VCA0148 | 0.08 | 0.08 | 0.07 | 0.04 |
| VCA0149 | 0.07 | 0.09 | 0.04 | 0.04 |
| VCA0150 | 0.06 | 0.07 | 0.07 | 0.07 |
| VCA0151 | 0.04 | 0.04 | 0.05 | 0.05 |
| VCA0152 | 0.05 | 0.06 | 0.09 | 0.08 |
| VCA0153 | 0.04 | 0.06 | 0.06 | 0.04 |
| VCA0154 | 0.06 | 0.08 | 0.05 | 0.05 |
| VCA0155 | 0.05 | 0.07 | 0.07 | 0.09 |
| VCA0156 | 0.05 | 0.07 | 0.10 | 0.10 |
| VCA0157 | 0.04 | 0.04 | 0.04 | 0.06 |

|         |       |       |       |       |
|---------|-------|-------|-------|-------|
| VCA0158 | 0.06  | 0.07  | 0.05  | 0.05  |
| VCA0159 | 0.06  | 0.06  | 0.06  | 0.08  |
| VCA0160 | 0.04  | 0.05  | 0.05  | 0.05  |
| VCA0161 | 0.03  | 0.05  | 0.06  | 0.04  |
| VCA0162 | 0.07  | 0.07  | 0.07  | 0.06  |
| VCA0163 | 0.08  | 0.08  | 0.06  | 0.05  |
| VCA0164 | 0.06  | 0.08  | 0.06  | 0.05  |
| VCA0165 | -0.04 | -0.02 | -0.01 | 0.01  |
| VCA0166 | 0.06  | 0.07  | 0.06  | 0.04  |
| VCA0167 | 0.05  | 0.05  | 0.03  | 0.04  |
| VCA0168 | 0.04  | 0.05  | 0.04  | 0.06  |
| VCA0171 | 0.07  | 0.04  | 0.04  | 0.04  |
| VCA0172 | 0.06  | 0.08  | 0.09  | 0.10  |
| VCA0173 | 0.07  | 0.07  | 0.08  | 0.06  |
| VCA0174 | 0.05  | 0.05  | 0.09  | 0.08  |
| VCA0175 | 0.05  | 0.06  | 0.07  | 0.06  |
| VCA0176 | 0.12  | 0.12  | 0.05  | 0.06  |
| VCA0177 | 0.06  | 0.07  | 0.09  | 0.06  |
| VCA0178 | 0.10  | 0.09  | 0.05  | 0.05  |
| VCA0179 | 0.04  | 0.05  | 0.09  | 0.09  |
| VCA0180 | 0.06  | 0.06  | 0.05  | 0.05  |
| VCA0181 | 0.05  | 0.08  | 0.06  | 0.07  |
| VCA0182 | 0.08  | 0.09  | 0.06  | 0.05  |
| VCA0183 | 0.07  | 0.06  | 0.12  | 0.07  |
| VCA0184 | 0.05  | 0.06  | 0.06  | 0.06  |
| VCA0185 | 0.06  | 0.07  | 0.05  | 0.05  |
| VCA0186 | 0.05  | 0.05  | 0.04  | 0.03  |
| VCA0187 | 0.06  | 0.07  | 0.06  | 0.04  |
| VCA0188 | 0.03  | 0.05  | 0.04  | 0.03  |
| VCA0189 | 0.04  | 0.04  | 0.06  | 0.03  |
| VCA0190 | 0.05  | 0.04  | 0.03  | 0.05  |
| VCA0191 | 0.01  | 0.04  | 0.07  | 0.06  |
| VCA0192 | 0.00  | -0.01 | 0.05  | 0.07  |
| VCA0193 | 0.01  | 0.01  | 0.05  | 0.05  |
| VCA0194 | 0.00  | 0.01  | 0.07  | 0.06  |
| VCA0195 | 0.06  | 0.07  | 0.02  | 0.02  |
| VCA0196 | 0.05  | 0.05  | 0.03  | 0.02  |
| VCA0197 | 0.04  | 0.04  | 0.07  | 0.05  |
| VCA0199 | 0.06  | 0.06  | 0.07  | 0.05  |
| VCA0200 | 0.01  | 0.01  | 0.03  | 0.03  |
| VCA0201 | 0.01  | 0.01  | 0.08  | 0.08  |
| VCA0202 | 0.05  | 0.05  | 0.05  | 0.06  |
| VCA0203 | 0.04  | 0.05  | 0.04  | -0.09 |

|         |       |      |      |      |
|---------|-------|------|------|------|
| VCA0204 | 0.06  | 0.06 | 0.08 | 0.08 |
| VCA0205 | 0.03  | 0.05 | 0.05 | 0.04 |
| VCA0206 | 0.10  | 0.04 | 0.10 | 0.07 |
| VCA0207 | 0.04  | 0.04 | 0.09 | 0.09 |
| VCA0208 | 0.03  | 0.03 | 0.04 | 0.05 |
| VCA0209 | 0.05  | 0.02 | 0.09 | 0.07 |
| VCA0210 | 0.11  | 0.09 | 0.27 | 0.23 |
| VCA0211 | 0.00  | 0.01 | 0.05 | 0.06 |
| VCA0212 | 0.00  | 0.01 | 0.03 | 0.04 |
| VCA0213 | 0.03  | 0.02 | 0.06 | 0.05 |
| VCA0214 | 0.00  | 0.01 | 0.04 | 0.04 |
| VCA0214 | -0.01 | 0.00 | 0.04 | 0.05 |
| VCA0215 | 0.02  | 0.10 | 0.04 | 0.05 |
| VCA0216 | 0.01  | 0.02 | 0.00 | 0.05 |
| VCA0216 | 0.01  | 0.03 | 0.04 | 0.03 |
| VCA0217 | 0.03  | 0.04 | 0.05 | 0.04 |
| VCA0218 | 0.02  | 0.02 | 0.06 | 0.06 |
| VCA0219 | 0.04  | 0.04 | 0.06 | 0.04 |
| VCA0220 | 0.00  | 0.01 | 0.06 | 0.05 |
| VCA0221 | 0.03  | 0.03 | 0.02 | 0.02 |
| VCA0222 | 0.01  | 0.01 | 0.06 | 0.04 |
| VCA0224 | 0.03  | 0.04 | 0.05 | 0.03 |
| VCA0225 | 0.07  | 0.07 | 0.07 | 0.09 |
| VCA0226 | 0.04  | 0.04 | 0.06 | 0.05 |
| VCA0227 | 0.02  | 0.03 | 0.04 | 0.04 |
| VCA0228 | 0.01  | 0.02 | 0.05 | 0.05 |
| VCA0229 | 0.04  | 0.06 | 0.04 | 0.04 |
| VCA0230 | 0.04  | 0.06 | 0.10 | 0.10 |
| VCA0231 | 0.03  | 0.03 | 0.05 | 0.04 |
| VCA0232 | 0.01  | 0.02 | 0.05 | 0.02 |
| VCA0233 | -0.02 | 0.01 | 0.05 | 0.05 |
| VCA0233 | 0.01  | 0.01 | 0.06 | 0.05 |
| VCA0234 | 0.03  | 0.04 | 0.03 | 0.04 |
| VCA0235 | 0.05  | 0.05 | 0.06 | 0.06 |
| VCA0236 | 0.03  | 0.03 | 0.04 | 0.02 |
| VCA0237 | 0.05  | 0.01 | 0.06 | 0.05 |
| VCA0238 | 0.03  | 0.01 | 0.05 | 0.05 |
| VCA0239 | 0.05  | 0.05 | 0.10 | 0.10 |
| VCA0240 | 0.03  | 0.03 | 0.08 | 0.07 |
| VCA0241 | 0.02  | 0.03 | 0.07 | 0.07 |
| VCA0242 | 0.04  | 0.05 | 0.13 | 0.10 |
| VCA0243 | 0.03  | 0.04 | 0.05 | 0.05 |
| VCA0244 | 0.05  | 0.05 | 0.06 | 0.06 |

|         |       |       |      |      |
|---------|-------|-------|------|------|
| VCA0245 | 0.04  | 0.05  | 0.04 | 0.04 |
| VCA0246 | 0.09  | 0.09  | 0.04 | 0.04 |
| VCA0247 | 0.00  | 0.00  | 0.07 | 0.06 |
| VCA0248 | -0.02 | -0.01 | 0.04 | 0.02 |
| VCA0249 | -0.01 | -0.01 | 0.06 | 0.04 |
| VCA0250 | 0.02  | 0.02  | 0.06 | 0.04 |
| VCA0251 | 0.04  | 0.06  | 0.02 | 0.02 |
| VCA0252 | 0.05  | 0.07  | 0.05 | 0.06 |
| VCA0253 | 0.05  | 0.06  | 0.04 | 0.04 |
| VCA0255 | 0.01  | 0.02  | 0.05 | 0.05 |
| VCA0256 | 0.07  | 0.06  | 0.06 | 0.06 |
| VCA0258 | 0.05  | 0.05  | 0.05 | 0.07 |
| VCA0259 | 0.08  | 0.06  | 0.03 | 0.02 |
| VCA0260 | 0.07  | 0.07  | 0.08 | 0.04 |
| VCA0262 | 0.05  | 0.10  | 0.04 | 0.04 |
| VCA0263 | 0.07  | 0.05  | 0.08 | 0.09 |
| VCA0264 | 0.02  | 0.03  | 0.05 | 0.05 |
| VCA0265 | 0.03  | 0.03  | 0.05 | 0.05 |
| VCA0266 | 0.03  | 0.13  | 0.04 | 0.04 |
| VCA0267 | 0.02  | 0.03  | 0.04 | 0.03 |
| VCA0268 | 0.02  | 0.03  | 0.04 | 0.02 |
| VCA0269 | 0.05  | 0.06  | 0.04 | 0.04 |
| VCA0270 | 0.03  | 0.03  | 0.02 | 0.08 |
| VCA0271 | 0.04  | 0.04  | 0.05 | 0.05 |
| VCA0272 | 0.05  | 0.05  | 0.05 | 0.03 |
| VCA0273 | 0.06  | 0.07  | 0.07 | 0.02 |
| VCA0274 | 0.04  | 0.03  | 0.04 | 0.04 |
| VCA0275 | 0.07  | 0.08  | 0.04 | 0.03 |
| VCA0276 | 0.05  | 0.04  | 0.04 | 0.04 |
| VCA0277 | 0.04  | 0.04  | 0.06 | 0.05 |
| VCA0278 | 0.03  | 0.05  | 0.04 | 0.04 |
| VCA0279 | 0.05  | 0.06  | 0.07 | 0.07 |
| VCA0280 | 0.03  | 0.03  | 0.03 | 0.04 |
| VCA0281 | 0.01  | 0.02  | 0.04 | 0.04 |
| VCA0282 | 0.02  | 0.03  | 0.01 | 0.03 |
| VCA0283 | 0.05  | 0.06  | 0.04 | 0.06 |
| VCA0284 | 0.07  | 0.07  | 0.04 | 0.07 |
| VCA0285 | 0.07  | 0.08  | 0.04 | 0.03 |
| VCA0286 | 0.07  | 0.06  | 0.04 | 0.02 |
| VCA0287 | 0.03  | 0.02  | 0.09 | 0.08 |
| VCA0288 | 0.08  | 0.07  | 0.05 | 0.06 |
| VCA0289 | 0.08  | 0.07  | 0.04 | 0.04 |
| VCA0290 | 0.04  | 0.05  | 0.07 | 0.07 |

|         |       |      |      |      |
|---------|-------|------|------|------|
| VCA0291 | 0.06  | 0.07 | 0.05 | 0.05 |
| VCA0292 | 0.07  | 0.05 | 0.04 | 0.04 |
| VCA0294 | 0.07  | 0.07 | 0.05 | 0.04 |
| VCA0295 | 0.07  | 0.06 | 0.02 | 0.05 |
| VCA0296 | 0.10  | 0.10 | 0.03 | 0.05 |
| VCA0297 | 0.07  | 0.06 | 0.02 | 0.03 |
| VCA0298 | 0.07  | 0.07 | 0.08 | 0.08 |
| VCA0299 | 0.10  | 0.09 | 0.07 | 0.06 |
| VCA0300 | 0.09  | 0.07 | 0.05 | 0.02 |
| VCA0301 | 0.09  | 0.07 | 0.10 | 0.09 |
| VCA0303 | 0.07  | 0.08 | 0.05 | 0.04 |
| VCA0304 | 0.08  | 0.07 | 0.14 | 0.16 |
| VCA0305 | 0.01  | 0.03 | 0.06 | 0.06 |
| VCA0306 | 0.07  | 0.07 | 0.06 | 0.06 |
| VCA0307 | 0.03  | 0.02 | 0.05 | 0.06 |
| VCA0307 | -0.01 | 0.00 | 0.08 | 0.07 |
| VCA0308 | 0.03  | 0.02 | 0.09 | 0.07 |
| VCA0308 | 0.01  | 0.00 | 0.05 | 0.05 |
| VCA0309 | 0.10  | 0.09 | 0.09 | 0.10 |
| VCA0310 | 0.07  | 0.07 | 0.04 | 0.04 |
| VCA0312 | 0.08  | 0.06 | 0.05 | 0.04 |
| VCA0313 | 0.11  | 0.09 | 0.06 | 0.03 |
| VCA0314 | 0.10  | 0.08 | 0.06 | 0.06 |
| VCA0315 | 0.07  | 0.06 | 0.07 | 0.05 |
| VCA0316 | 0.07  | 0.06 | 0.06 | 0.06 |
| VCA0317 | 0.08  | 0.07 | 0.03 | 0.04 |
| VCA0319 | 0.07  | 0.07 | 0.04 | 0.07 |
| VCA0320 | 0.06  | 0.08 | 0.06 | 0.08 |
| VCA0321 | 0.09  | 0.08 | 0.04 | 0.07 |
| VCA0322 | 0.13  | 0.10 | 0.05 | 0.04 |
| VCA0323 | 0.04  | 0.04 | 0.00 | 0.01 |
| VCA0324 | 0.01  | 0.01 | 0.07 | 0.07 |
| VCA0326 | 0.06  | 0.08 | 0.03 | 0.04 |
| VCA0327 | 0.02  | 0.02 | 0.08 | 0.07 |
| VCA0328 | 0.00  | 0.01 | 0.14 | 0.12 |
| VCA0329 | 0.04  | 0.06 | 0.08 | 0.07 |
| VCA0330 | 0.01  | 0.01 | 0.07 | 0.06 |
| VCA0331 | 0.03  | 0.03 | 0.04 | 0.04 |
| VCA0333 | 0.07  | 0.06 | 0.07 | 0.05 |
| VCA0334 | 0.02  | 0.02 | 0.06 | 0.04 |
| VCA0335 | 0.06  | 0.06 | 0.01 | 0.02 |
| VCA0336 | 0.05  | 0.06 | 0.04 | 0.04 |
| VCA0337 | 0.02  | 0.01 | 0.13 | 0.08 |



|         |       |       |      |      |
|---------|-------|-------|------|------|
| VCA0338 | 0.02  | 0.02  | 0.03 | 0.05 |
| VCA0338 | 0.01  | 0.02  | 0.04 | 0.06 |
| VCA0339 | 0.04  | 0.06  | 0.03 | 0.04 |
| VCA0340 | -0.01 | -0.01 | 0.18 | 0.14 |
| VCA0341 | 0.02  | 0.02  | 0.04 | 0.04 |
| VCA0341 | -0.02 | -0.01 | 0.05 | 0.06 |
| VCA0342 | 0.02  | 0.01  | 0.11 | 0.09 |
| VCA0343 | 0.06  | 0.05  | 0.05 | 0.03 |
| VCA0344 | 0.04  | 0.04  | 0.04 | 0.02 |
| VCA0345 | 0.00  | 0.00  | 0.10 | 0.07 |
| VCA0346 | 0.13  | 0.01  | 0.02 | 0.02 |
| VCA0347 | 0.03  | 0.04  | 0.05 | 0.06 |
| VCA0349 | 0.01  | 0.02  | 0.03 | 0.05 |
| VCA0349 | 0.01  | 0.03  | 0.04 | 0.05 |
| VCA0350 | 0.05  | 0.07  | 0.05 | 0.02 |
| VCA0351 | 0.00  | 0.00  | 0.08 | 0.08 |
| VCA0352 | 0.02  | 0.03  | 0.00 | 0.03 |
| VCA0353 | 0.05  | 0.06  | 0.06 | 0.05 |
| VCA0354 | 0.03  | 0.04  | 0.03 | 0.02 |
| VCA0355 | 0.11  | 0.04  | 0.06 | 0.14 |
| VCA0356 | 0.02  | 0.02  | 0.08 | 0.08 |
| VCA0357 | 0.05  | 0.05  | 0.05 | 0.02 |
| VCA0358 | 0.02  | 0.01  | 0.06 | 0.07 |
| VCA0359 | 0.08  | 0.05  | 0.04 | 0.03 |
| VCA0360 | 0.09  | 0.10  | 0.04 | 0.03 |
| VCA0361 | 0.11  | 0.10  | 0.03 | 0.04 |
| VCA0362 | 0.06  | 0.07  | 0.03 | 0.03 |
| VCA0363 | 0.06  | 0.05  | 0.05 | 0.07 |
| VCA0364 | 0.07  | 0.07  | 0.03 | 0.03 |
| VCA0366 | 0.07  | 0.07  | 0.08 | 0.07 |
| VCA0367 | 0.06  | 0.05  | 0.04 | 0.09 |
| VCA0368 | 0.06  | 0.06  | 0.03 | 0.07 |
| VCA0369 | 0.07  | 0.07  | 0.07 | 0.05 |
| VCA0370 | 0.06  | 0.06  | 0.09 | 0.12 |
| VCA0371 | 0.03  | 0.02  | 0.09 | 0.08 |
| VCA0372 | 0.13  | 0.12  | 0.06 | 0.06 |
| VCA0373 | 0.06  | 0.07  | 0.05 | 0.05 |
| VCA0374 | 0.01  | 0.03  | 0.05 | 0.04 |
| VCA0376 | 0.07  | 0.08  | 0.02 | 0.02 |
| VCA0379 | 0.07  | 0.09  | 0.07 | 0.10 |
| VCA0379 | 0.02  | 0.03  | 0.04 | 0.05 |
| VCA0380 | 0.03  | 0.03  | 0.04 | 0.05 |
| VCA0381 | 0.04  | 0.07  | 0.03 | 0.02 |

|         |      |      |      |      |
|---------|------|------|------|------|
| VCA0382 | 0.06 | 0.05 | 0.10 | 0.08 |
| VCA0383 | 0.06 | 0.07 | 0.06 | 0.06 |
| VCA0384 | 0.06 | 0.06 | 0.03 | 0.02 |
| VCA0386 | 0.03 | 0.04 | 0.10 | 0.13 |
| VCA0387 | 0.03 | 0.03 | 0.01 | 0.02 |
| VCA0388 | 0.04 | 0.07 | 0.03 | 0.09 |
| VCA0389 | 0.02 | 0.03 | 0.04 | 0.03 |
| VCA0390 | 0.06 | 0.11 | 0.02 | 0.02 |
| VCA0391 | 0.03 | 0.03 | 0.06 | 0.07 |
| VCA0392 | 0.04 | 0.04 | 0.13 | 0.09 |
| VCA0393 | 0.04 | 0.03 | 0.04 | 0.02 |
| VCA0394 | 0.08 | 0.09 | 0.02 | 0.02 |
| VCA0395 | 0.03 | 0.02 | 0.04 | 0.04 |
| VCA0396 | 0.04 | 0.01 | 0.03 | 0.08 |
| VCA0397 | 0.05 | 0.05 | 0.05 | 0.05 |
| VCA0398 | 0.05 | 0.10 | 0.06 | 0.06 |
| VCA400  | 0.01 | 0.02 | 0.10 | 0.06 |
| VCA401  | 0.03 | 0.03 | 0.05 | 0.09 |
| VCA401  | 0.01 | 0.04 | 0.04 | 0.04 |
| VCA402  | 0.17 | 0.19 | 0.03 | 0.03 |
| VCA403  | 0.03 | 0.04 | 0.05 | 0.03 |
| VCA404  | 0.10 | 0.08 | 0.05 | 0.07 |
| VCA405  | 0.03 | 0.06 | 0.06 | 0.07 |
| VCA406  | 0.03 | 0.04 | 0.05 | 0.06 |
| VCA407  | 0.05 | 0.06 | 0.04 | 0.03 |
| VCA408  | 0.06 | 0.05 | 0.15 | 0.11 |
| VCA409  | 0.10 | 0.09 | 0.03 | 0.03 |
| VCA410  | 0.12 | 0.07 | 0.07 | 0.09 |
| VCA411  | 0.06 | 0.06 | 0.06 | 0.03 |
| VCA412  | 0.04 | 0.05 | 0.05 | 0.05 |
| VCA413  | 0.04 | 0.06 | 0.07 | 0.07 |
| VCA414  | 0.02 | 0.02 | 0.05 | 0.04 |
| VCA415  | 0.06 | 0.08 | 0.08 | 0.08 |
| VCA417  | 0.07 | 0.06 | 0.09 | 0.08 |
| VCA418  | 0.04 | 0.05 | 0.06 | 0.05 |
| VCA419  | 0.04 | 0.05 | 0.04 | 0.03 |
| VCA420  | 0.04 | 0.02 | 0.05 | 0.04 |
| VCA421  | 0.06 | 0.05 | 0.04 | 0.04 |
| VCA422  | 0.10 | 0.06 | 0.06 | 0.05 |
| VCA423  | 0.03 | 0.04 | 0.05 | 0.06 |
| VCA424  | 0.02 | 0.02 | 0.02 | 0.03 |
| VCA425  | 0.04 | 0.03 | 0.06 | 0.04 |
| VCA426  | 0.05 | 0.05 | 0.05 | 0.05 |

|         |      |      |      |      |
|---------|------|------|------|------|
| VCA0427 | 0.05 | 0.06 | 0.06 | 0.04 |
| VCA0428 | 0.05 | 0.07 | 0.07 | 0.06 |
| VCA0429 | 0.05 | 0.06 | 0.05 | 0.06 |
| VCA0430 | 0.04 | 0.06 | 0.06 | 0.05 |
| VCA0431 | 0.03 | 0.04 | 0.05 | 0.04 |
| VCA0432 | 0.05 | 0.05 | 0.10 | 0.09 |
| VCA0433 | 0.15 | 0.03 | 0.03 | 0.02 |
| VCA0434 | 0.05 | 0.05 | 0.07 | 0.06 |
| VCA0435 | 0.05 | 0.04 | 0.06 | 0.06 |
| VCA0436 | 0.03 | 0.03 | 0.07 | 0.08 |
| VCA0437 | 0.04 | 0.05 | 0.04 | 0.02 |
| VCA0437 | 0.05 | 0.05 | 0.06 | 0.08 |
| VCA0438 | 0.05 | 0.07 | 0.02 | 0.02 |
| VCA0439 | 0.04 | 0.04 | 0.06 | 0.07 |
| VCA0440 | 0.04 | 0.04 | 0.04 | 0.02 |
| VCA0441 | 0.03 | 0.04 | 0.08 | 0.08 |
| VCA0442 | 0.03 | 0.03 | 0.04 | 0.03 |
| VCA0443 | 0.01 | 0.03 | 0.07 | 0.06 |
| VCA0445 | 0.04 | 0.04 | 0.05 | 0.03 |
| VCA0446 | 0.06 | 0.06 | 0.05 | 0.05 |
| VCA0447 | 0.02 | 0.04 | 0.04 | 0.04 |
| VCA0448 | 0.02 | 0.03 | 0.06 | 0.02 |
| VCA0449 | 0.08 | 0.09 | 0.05 | 0.04 |
| VCA0450 | 0.03 | 0.03 | 0.06 | 0.04 |
| VCA0451 | 0.02 | 0.04 | 0.07 | 0.03 |
| VCA0453 | 0.08 | 0.07 | 0.09 | 0.06 |
| VCA0454 | 0.04 | 0.04 | 0.13 | 0.13 |
| VCA0455 | 0.02 | 0.02 | 0.04 | 0.05 |
| VCA0456 | 0.07 | 0.07 | 0.03 | 0.03 |
| VCA0457 | 0.02 | 0.03 | 0.04 | 0.03 |
| VCA0458 | 0.08 | 0.06 | 0.03 | 0.03 |
| VCA0459 | 0.04 | 0.04 | 0.02 | 0.02 |
| VCA0460 | 0.03 | 0.03 | 0.05 | 0.09 |
| VCA0461 | 0.07 | 0.08 | 0.05 | 0.06 |
| VCA0462 | 0.06 | 0.07 | 0.04 | 0.03 |
| VCA0463 | 0.04 | 0.05 | 0.07 | 0.06 |
| VCA0464 | 0.03 | 0.06 | 0.04 | 0.04 |
| VCA0465 | 0.02 | 0.03 | 0.05 | 0.04 |
| VCA0466 | 0.06 | 0.06 | 0.07 | 0.06 |
| VCA0467 | 0.06 | 0.06 | 0.06 | 0.05 |
| VCA0468 | 0.06 | 0.06 | 0.06 | 0.05 |
| VCA0469 | 0.05 | 0.08 | 0.03 | 0.04 |
| VCA0470 | 0.05 | 0.06 | 0.06 | 0.05 |

|         |       |       |       |       |
|---------|-------|-------|-------|-------|
| VCA0471 | 0.06  | 0.07  | 0.05  | 0.04  |
| VCA0472 | 0.03  | 0.03  | 0.10  | 0.09  |
| VCA0473 | 0.06  | 0.09  | 0.07  | 0.07  |
| VCA0474 | 0.06  | 0.07  | 0.07  | 0.08  |
| VCA0476 | 0.05  | 0.06  | 0.07  | 0.08  |
| VCA0477 | 0.02  | 0.04  | 0.04  | 0.05  |
| VCA0479 | 0.04  | 0.05  | 0.06  | 0.04  |
| VCA0481 | 0.01  | 0.03  | -0.02 | -0.03 |
| VCA0482 | 0.02  | 0.02  | 0.06  | 0.07  |
| VCA0483 | 0.04  | 0.06  | 0.06  | 0.05  |
| VCA0484 | 0.07  | 0.07  | 0.06  | 0.06  |
| VCA0485 | 0.03  | 0.03  | 0.05  | 0.06  |
| VCA0487 | 0.04  | 0.05  | 0.04  | 0.04  |
| VCA0488 | 0.03  | 0.06  | 0.06  | 0.06  |
| VCA0490 | 0.02  | 0.05  | 0.04  | 0.04  |
| VCA0491 | 0.03  | 0.05  | 0.04  | 0.04  |
| VCA0492 | 0.05  | 0.05  | 0.07  | 0.05  |
| VCA0493 | 0.04  | 0.04  | 0.06  | 0.05  |
| VCA0494 | 0.07  | 0.06  | 0.09  | 0.06  |
| VCA0495 | 0.05  | 0.06  | 0.05  | 0.05  |
| VCA0496 | 0.09  | 0.07  | 0.05  | 0.09  |
| VCA0498 | 0.05  | 0.09  | 0.06  | 0.06  |
| VCA0499 | 0.06  | 0.06  | 0.05  | 0.06  |
| VCA0500 | 0.07  | 0.08  | 0.09  | 0.07  |
| VCA0501 | 0.01  | 0.02  | 0.05  | 0.05  |
| VCA0502 | 0.04  | 0.06  | 0.05  | 0.06  |
| VCA0505 | 0.03  | 0.06  | 0.06  | 0.04  |
| VCA0506 | 0.03  | 0.03  | 0.07  | 0.05  |
| VCA0507 | -0.01 | 0.00  | 0.03  | 0.05  |
| VCA0508 | 0.01  | 0.03  | 0.05  | 0.05  |
| VCA0509 | 0.02  | 0.03  | 0.05  | 0.04  |
| VCA0510 | 0.03  | 0.03  | 0.07  | 0.05  |
| VCA0511 | 0.04  | 0.04  | 0.07  | 0.06  |
| VCA0512 | 0.04  | 0.05  | 0.04  | 0.06  |
| VCA0513 | 0.03  | 0.03  | 0.05  | 0.07  |
| VCA0514 | 0.06  | 0.08  | 0.03  | 0.02  |
| VCA0515 | 0.08  | 0.10  | 0.03  | 0.03  |
| VCA0516 | 0.02  | 0.01  | 0.06  | 0.08  |
| VCA0517 | -0.01 | -0.01 | 0.04  | 0.06  |
| VCA0518 | 0.03  | 0.03  | 0.07  | 0.08  |
| VCA0519 | 0.00  | 0.01  | 0.05  | 0.04  |
| VCA0520 | 0.03  | 0.01  | 0.02  | 0.04  |
| VCA0521 | 0.09  | 0.05  | 0.07  | 0.08  |

|         |       |       |       |       |
|---------|-------|-------|-------|-------|
| VCA0522 | 0.09  | 0.08  | 0.07  | 0.06  |
| VCA0523 | 0.03  | 0.03  | 0.06  | 0.06  |
| VCA0524 | 0.07  | 0.06  | 0.03  | 0.03  |
| VCA0525 | 0.09  | 0.09  | 0.00  | 0.01  |
| VCA0526 | 0.03  | 0.05  | 0.02  | 0.02  |
| VCA0527 | 0.03  | 0.02  | 0.08  | 0.08  |
| VCA0528 | 0.03  | 0.03  | 0.06  | 0.09  |
| VCA0529 | 0.00  | 0.01  | 0.06  | 0.05  |
| VCA0530 | 0.03  | 0.04  | 0.04  | 0.05  |
| VCA0531 | 0.05  | 0.04  | 0.05  | 0.04  |
| VCA0532 | 0.04  | 0.05  | 0.04  | 0.03  |
| VCA0533 | 0.02  | 0.02  | 0.04  | 0.06  |
| VCA0534 | 0.02  | 0.05  | 0.05  | 0.05  |
| VCA0535 | 0.04  | 0.04  | 0.06  | 0.06  |
| VCA0538 | 0.03  | 0.03  | 0.07  | 0.07  |
| VCA0539 | 0.03  | 0.04  | 0.17  | 0.12  |
| VCA0540 | 0.00  | 0.00  | 0.05  | 0.05  |
| VCA0541 | 0.09  | 0.08  | 0.03  | 0.03  |
| VCA0542 | 0.03  | 0.02  | 0.06  | 0.05  |
| VCA0543 | 0.02  | 0.03  | 0.09  | 0.08  |
| VCA0546 | 0.04  | 0.05  | 0.15  | 0.14  |
| VCA0547 | 0.09  | 0.08  | 0.04  | 0.04  |
| VCA0548 | 0.07  | 0.08  | 0.01  | 0.05  |
| VCA0549 | 0.05  | 0.05  | 0.15  | 0.14  |
| VCA0550 | 0.01  | 0.01  | 0.15  | 0.14  |
| VCA0551 | 0.04  | 0.02  | 0.03  | 0.04  |
| VCA0552 | 0.05  | 0.05  | 0.07  | 0.07  |
| VCA0553 | 0.04  | 0.03  | 0.05  | 0.04  |
| VCA0554 | 0.02  | 0.00  | 0.04  | 0.04  |
| VCA0555 | 0.04  | 0.06  | 0.01  | 0.02  |
| VCA0556 | 0.04  | 0.02  | 0.04  | 0.03  |
| VCA0557 | -0.01 | -0.01 | -0.02 | -0.01 |
| VCA0558 | 0.03  | 0.05  | 0.03  | 0.03  |
| VCA0559 | -0.01 | -0.01 | 0.03  | 0.03  |
| VCA0560 | 0.01  | 0.00  | 0.06  | 0.06  |
| VCA0561 | 0.07  | 0.10  | 0.05  | 0.05  |
| VCA0562 | 0.05  | 0.06  | 0.04  | 0.05  |
| VCA0563 | 0.02  | 0.03  | 0.04  | 0.04  |
| VCA0564 | 0.02  | 0.02  | 0.04  | 0.05  |
| VCA0565 | 0.02  | 0.03  | 0.06  | 0.06  |
| VCA0566 | 0.06  | 0.07  | 0.04  | 0.02  |
| VCA0567 | 0.04  | 0.04  | 0.08  | 0.12  |
| VCA0568 | 0.06  | 0.07  | 0.05  | 0.05  |

|         |      |      |      |      |
|---------|------|------|------|------|
| VCA0569 | 0.08 | 0.07 | 0.04 | 0.05 |
| VCA0570 | 0.08 | 0.08 | 0.07 | 0.04 |
| VCA0571 | 0.04 | 0.04 | 0.02 | 0.09 |
| VCA0572 | 0.05 | 0.06 | 0.06 | 0.05 |
| VCA0573 | 0.07 | 0.07 | 0.06 | 0.05 |
| VCA0574 | 0.04 | 0.04 | 0.05 | 0.05 |
| VCA0575 | 0.11 | 0.11 | 0.08 | 0.07 |
| VCA0576 | 0.02 | 0.03 | 0.04 | 0.05 |
| VCA0577 | 0.09 | 0.08 | 0.03 | 0.02 |
| VCA0578 | 0.04 | 0.05 | 0.03 | 0.04 |
| VCA0579 | 0.07 | 0.05 | 0.06 | 0.03 |
| VCA0580 | 0.03 | 0.03 | 0.02 | 0.04 |
| VCA0581 | 0.03 | 0.03 | 0.03 | 0.06 |
| VCA0582 | 0.04 | 0.06 | 0.06 | 0.06 |
| VCA0583 | 0.04 | 0.03 | 0.04 | 0.02 |
| VCA0584 | 0.08 | 0.06 | 0.05 | 0.05 |
| VCA0585 | 0.04 | 0.05 | 0.02 | 0.04 |
| VCA0586 | 0.07 | 0.05 | 0.08 | 0.11 |
| VCA0587 | 0.08 | 0.08 | 0.07 | 0.06 |
| VCA0588 | 0.06 | 0.05 | 0.05 | 0.04 |
| VCA0589 | 0.02 | 0.02 | 0.00 | 0.01 |
| VCA0590 | 0.02 | 0.03 | 0.04 | 0.03 |
| VCA0591 | 0.04 | 0.06 | 0.04 | 0.06 |
| VCA0592 | 0.06 | 0.07 | 0.04 | 0.04 |
| VCA0593 | 0.56 | 0.55 | 0.58 | 0.52 |
| VCA0594 | 0.04 | 0.05 | 0.05 | 0.06 |
| VCA0595 | 0.06 | 0.07 | 0.08 | 0.05 |
| VCA0596 | 0.06 | 0.06 | 0.06 | 0.05 |
| VCA0597 | 0.04 | 0.05 | 0.02 | 0.02 |
| VCA0598 | 0.05 | 0.06 | 0.06 | 0.04 |
| VCA0599 | 0.05 | 0.07 | 0.07 | 0.07 |
| VCA0600 | 0.10 | 0.08 | 0.06 | 0.06 |
| VCA0601 | 0.03 | 0.03 | 0.05 | 0.08 |
| VCA0602 | 0.00 | 0.03 | 0.04 | 0.03 |
| VCA0603 | 0.06 | 0.09 | 0.11 | 0.07 |
| VCA0604 | 0.04 | 0.05 | 0.03 | 0.04 |
| VCA0605 | 0.02 | 0.01 | 0.06 | 0.06 |
| VCA0606 | 0.13 | 0.06 | 0.08 | 0.09 |
| VCA0607 | 0.09 | 0.09 | 0.07 | 0.06 |
| VCA0608 | 0.03 | 0.04 | 0.04 | 0.04 |
| VCA0609 | 0.05 | 0.06 | 0.04 | 0.05 |
| VCA0610 | 0.04 | 0.07 | 0.05 | 0.05 |
| VCA0611 | 0.06 | 0.07 | 0.02 | 0.04 |

|         |      |      |      |      |
|---------|------|------|------|------|
| VCA0612 | 0.05 | 0.07 | 0.03 | 0.03 |
| VCA0613 | 0.07 | 0.07 | 0.05 | 0.04 |
| VCA0614 | 0.05 | 0.06 | 0.06 | 0.09 |
| VCA0615 | 0.03 | 0.06 | 0.04 | 0.06 |
| VCA0616 | 0.04 | 0.04 | 0.04 | 0.05 |
| VCA0617 | 0.06 | 0.07 | 0.05 | 0.05 |
| VCA0618 | 0.08 | 0.04 | 0.05 | 0.05 |
| VCA0619 | 0.04 | 0.02 | 0.08 | 0.05 |
| VCA0620 | 0.06 | 0.06 | 0.11 | 0.09 |
| VCA0621 | 0.10 | 0.11 | 0.05 | 0.11 |
| VCA0622 | 0.07 | 0.06 | 0.05 | 0.05 |
| VCA0623 | 0.09 | 0.08 | 0.08 | 0.06 |
| VCA0624 | 0.04 | 0.04 | 0.05 | 0.16 |
| VCA0626 | 0.06 | 0.06 | 0.09 | 0.06 |
| VCA0627 | 0.05 | 0.05 | 0.05 | 0.05 |
| VCA0628 | 0.01 | 0.02 | 0.03 | 0.06 |
| VCA0629 | 0.05 | 0.05 | 0.04 | 0.04 |
| VCA0630 | 0.09 | 0.07 | 0.13 | 0.11 |
| VCA0631 | 0.08 | 0.10 | 0.10 | 0.08 |
| VCA0632 | 0.07 | 0.08 | 0.03 | 0.04 |
| VCA0633 | 0.03 | 0.03 | 0.08 | 0.06 |
| VCA0634 | 0.10 | 0.08 | 0.07 | 0.09 |
| VCA0635 | 0.07 | 0.08 | 0.09 | 0.07 |
| VCA0636 | 0.05 | 0.06 | 0.07 | 0.08 |
| VCA0637 | 0.05 | 0.06 | 0.06 | 0.07 |
| VCA0638 | 0.02 | 0.03 | 0.04 | 0.04 |
| VCA0639 | 0.08 | 0.05 | 0.07 | 0.04 |
| VCA0640 | 0.07 | 0.10 | 0.09 | 0.09 |
| VCA0641 | 0.08 | 0.06 | 0.10 | 0.13 |
| VCA0642 | 0.08 | 0.07 | 0.09 | 0.08 |
| VCA0644 | 0.06 | 0.06 | 0.11 | 0.05 |
| VCA0645 | 0.06 | 0.10 | 0.08 | 0.07 |
| VCA0646 | 0.05 | 0.06 | 0.04 | 0.05 |
| VCA0647 | 0.07 | 0.07 | 0.10 | 0.09 |
| VCA0648 | 0.05 | 0.05 | 0.04 | 0.03 |
| VCA0649 | 0.08 | 0.08 | 0.11 | 0.08 |
| VCA0650 | 0.05 | 0.06 | 0.04 | 0.05 |
| VCA0651 | 0.05 | 0.04 | 0.06 | 0.04 |
| VCA0652 | 0.07 | 0.06 | 0.06 | 0.07 |
| VCA0653 | 0.05 | 0.04 | 0.07 | 0.05 |
| VCA0654 | 0.04 | 0.07 | 0.13 | 0.10 |
| VCA0655 | 0.07 | 0.07 | 0.05 | 0.05 |
| VCA0656 | 0.06 | 0.05 | 0.07 | 0.08 |

|         |      |      |      |      |
|---------|------|------|------|------|
| VCA0657 | 0.10 | 0.10 | 0.03 | 0.03 |
| VCA0658 | 0.05 | 0.04 | 0.05 | 0.05 |
| VCA0659 | 0.06 | 0.05 | 0.06 | 0.08 |
| VCA0660 | 0.05 | 0.06 | 0.06 | 0.05 |
| VCA0661 | 0.06 | 0.05 | 0.06 | 0.07 |
| VCA0662 | 0.06 | 0.05 | 0.06 | 0.06 |
| VCA0663 | 0.04 | 0.03 | 0.04 | 0.03 |
| VCA0664 | 0.05 | 0.04 | 0.04 | 0.07 |
| VCA0665 | 0.06 | 0.07 | 0.07 | 0.07 |
| VCA0666 | 0.05 | 0.06 | 0.04 | 0.02 |
| VCA0667 | 0.05 | 0.05 | 0.05 | 0.04 |
| VCA0668 | 0.04 | 0.04 | 0.03 | 0.03 |
| VCA0669 | 0.05 | 0.06 | 0.07 | 0.07 |
| VCA0670 | 0.08 | 0.09 | 0.14 | 0.16 |
| VCA0671 | 0.03 | 0.03 | 0.10 | 0.10 |
| VCA0672 | 0.05 | 0.06 | 0.02 | 0.03 |
| VCA0673 | 0.05 | 0.04 | 0.06 | 0.06 |
| VCA0674 | 0.02 | 0.02 | 0.07 | 0.06 |
| VCA0675 | 0.04 | 0.04 | 0.03 | 0.03 |
| VCA0676 | 0.04 | 0.06 | 0.05 | 0.05 |
| VCA0677 | 0.05 | 0.03 | 0.09 | 0.09 |
| VCA0678 | 0.02 | 0.02 | 0.04 | 0.06 |
| VCA0678 | 0.01 | 0.01 | 0.05 | 0.04 |
| VCA0679 | 0.06 | 0.07 | 0.08 | 0.07 |
| VCA0680 | 0.06 | 0.05 | 0.07 | 0.06 |
| VCA0681 | 0.54 | 0.62 | 0.61 | 0.62 |
| VCA0682 | 0.06 | 0.06 | 0.04 | 0.05 |
| VCA0683 | 0.06 | 0.06 | 0.07 | 0.05 |
| VCA0684 | 0.03 | 0.04 | 0.07 | 0.07 |
| VCA0685 | 0.07 | 0.06 | 0.08 | 0.12 |
| VCA0686 | 0.05 | 0.06 | 0.05 | 0.05 |
| VCA0687 | 0.04 | 0.05 | 0.09 | 0.08 |
| VCA0688 | 0.07 | 0.06 | 0.03 | 0.03 |
| VCA0689 | 0.04 | 0.04 | 0.11 | 0.10 |
| VCA0690 | 0.04 | 0.04 | 0.08 | 0.07 |
| VCA0691 | 0.05 | 0.05 | 0.07 | 0.14 |
| VCA0692 | 0.01 | 0.04 | 0.02 | 0.04 |
| VCA0693 | 0.00 | 0.01 | 0.02 | 0.02 |
| VCA0694 | 0.06 | 0.05 | 0.08 | 0.06 |
| VCA0695 | 0.04 | 0.03 | 0.07 | 0.11 |
| VCA0696 | 0.07 | 0.04 | 0.03 | 0.03 |
| VCA0696 | 0.03 | 0.03 | 0.02 | 0.03 |
| VCA0697 | 0.01 | 0.01 | 0.10 | 0.09 |



|         |      |       |      |      |
|---------|------|-------|------|------|
| VCA0698 | 0.07 | 0.06  | 0.03 | 0.03 |
| VCA0699 | 0.05 | 0.05  | 0.08 | 0.06 |
| VCA0700 | 0.05 | 0.05  | 0.05 | 0.05 |
| VCA0701 | 0.05 | 0.06  | 0.06 | 0.06 |
| VCA0702 | 0.09 | 0.10  | 0.11 | 0.09 |
| VCA0703 | 0.05 | 0.04  | 0.06 | 0.04 |
| VCA0704 | 0.05 | 0.04  | 0.08 | 0.07 |
| VCA0705 | 0.03 | 0.04  | 0.03 | 0.04 |
| VCA0706 | 0.03 | 0.03  | 0.05 | 0.05 |
| VCA0707 | 0.03 | 0.03  | 0.13 | 0.12 |
| VCA0708 | 0.05 | 0.04  | 0.06 | 0.04 |
| VCA0709 | 0.02 | 0.02  | 0.03 | 0.03 |
| VCA0710 | 0.08 | 0.07  | 0.05 | 0.06 |
| VCA0711 | 0.08 | 0.05  | 0.04 | 0.07 |
| VCA0712 | 0.10 | 0.09  | 0.07 | 0.06 |
| VCA0713 | 0.06 | 0.05  | 0.07 | 0.07 |
| VCA0714 | 0.08 | 0.07  | 0.05 | 0.05 |
| VCA0715 | 0.04 | 0.05  | 0.06 | 0.07 |
| VCA0716 | 0.04 | 0.02  | 0.07 | 0.05 |
| VCA0717 | 0.03 | 0.05  | 0.04 | 0.14 |
| VCA0718 | 0.07 | 0.08  | 0.03 | 0.03 |
| VCA0719 | 0.12 | 0.13  | 0.05 | 0.05 |
| VCA0720 | 0.01 | 0.01  | 0.14 | 0.12 |
| VCA0721 | 0.06 | 0.07  | 0.04 | 0.06 |
| VCA0722 | 0.12 | 0.14  | 0.06 | 0.05 |
| VCA0723 | 0.04 | 0.02  | 0.06 | 0.05 |
| VCA0724 | 0.03 | 0.04  | 0.02 | 0.02 |
| VCA0724 | 0.01 | 0.05  | 0.07 | 0.04 |
| VCA0725 | 0.05 | 0.06  | 0.06 | 0.06 |
| VCA0726 | 0.04 | 0.08  | 0.04 | 0.03 |
| VCA0727 | 0.04 | 0.06  | 0.04 | 0.05 |
| VCA0728 | 0.05 | 0.06  | 0.06 | 0.05 |
| VCA0729 | 0.10 | 0.07  | 0.06 | 0.06 |
| VCA0730 | 0.04 | 0.04  | 0.05 | 0.05 |
| VCA0730 | 0.01 | -0.02 | 0.08 | 0.04 |
| VCA0731 | 0.14 | 0.12  | 0.03 | 0.03 |
| VCA0732 | 0.03 | 0.03  | 0.07 | 0.04 |
| VCA0733 | 0.09 | 0.09  | 0.06 | 0.07 |
| VCA0734 | 0.08 | 0.08  | 0.05 | 0.06 |
| VCA0735 | 0.12 | 0.13  | 0.23 | 0.24 |
| VCA0736 | 0.01 | 0.02  | 0.04 | 0.05 |
| VCA0737 | 0.14 | 0.11  | 0.02 | 0.02 |
| VCA0738 | 0.05 | 0.06  | 0.02 | 0.01 |

|         |      |      |       |       |
|---------|------|------|-------|-------|
| VCA0739 | 0.15 | 0.16 | 0.05  | 0.04  |
| VCA0740 | 0.15 | 0.13 | -0.01 | 0.01  |
| VCA0741 | 0.09 | 0.08 | 0.05  | 0.04  |
| VCA0742 | 0.06 | 0.06 | 0.03  | 0.05  |
| VCA0743 | 0.13 | 0.12 | 0.02  | 0.01  |
| VCA0744 | 0.11 | 0.12 | 0.12  | 0.13  |
| VCA0745 | 0.02 | 0.03 | 0.04  | 0.03  |
| VCA0746 | 0.12 | 0.11 | 0.04  | 0.01  |
| VCA0747 | 0.07 | 0.05 | 0.04  | 0.03  |
| VCA0748 | 0.12 | 0.12 | 0.02  | 0.04  |
| VCA0749 | 0.12 | 0.09 | 0.02  | 0.01  |
| VCA0750 | 0.07 | 0.07 | 0.05  | 0.05  |
| VCA0750 | 0.07 | 0.07 | 0.03  | 0.05  |
| VCA0751 | 0.09 | 0.09 | -0.01 | 0.01  |
| VCA0752 | 0.13 | 0.12 | -0.01 | 0.00  |
| VCA0753 | 0.08 | 0.06 | 0.04  | 0.04  |
| VCA0754 | 0.08 | 0.07 | 0.00  | 0.01  |
| VCA0755 | 0.10 | 0.09 | 0.03  | 0.02  |
| VCA0756 | 0.10 | 0.10 | 0.00  | 0.02  |
| VCA0757 | 0.12 | 0.12 | 0.01  | 0.01  |
| VCA0758 | 0.12 | 0.09 | 0.00  | 0.01  |
| VCA0759 | 0.13 | 0.11 | 0.01  | 0.00  |
| VCA0760 | 0.15 | 0.12 | 0.01  | 0.01  |
| VCA0761 | 0.12 | 0.09 | 0.02  | 0.02  |
| VCA0762 | 0.05 | 0.06 | 0.05  | 0.06  |
| VCA0763 | 0.10 | 0.10 | 0.07  | 0.07  |
| VCA0764 | 0.06 | 0.05 | 0.05  | 0.05  |
| VCA0765 | 0.13 | 0.10 | 0.03  | 0.01  |
| VCA0766 | 0.15 | 0.13 | -0.01 | -0.01 |
| VCA0767 | 0.08 | 0.09 | 0.03  | 0.02  |
| VCA0768 | 0.13 | 0.13 | 0.02  | 0.02  |
| VCA0769 | 0.12 | 0.11 | 0.00  | 0.00  |
| VCA0770 | 0.06 | 0.05 | 0.06  | 0.05  |
| VCA0770 | 0.06 | 0.06 | 0.04  | 0.05  |
| VCA0771 | 0.06 | 0.07 | 0.05  | 0.04  |
| VCA0772 | 0.10 | 0.07 | 0.02  | 0.02  |
| VCA0773 | 0.09 | 0.10 | 0.08  | 0.08  |
| VCA0774 | 0.05 | 0.04 | 0.04  | 0.04  |
| VCA0775 | 0.03 | 0.03 | 0.06  | 0.07  |
| VCA0776 | 0.02 | 0.02 | 0.05  | 0.05  |
| VCA0777 | 0.06 | 0.06 | 0.06  | 0.04  |
| VCA0778 | 0.09 | 0.07 | 0.08  | 0.05  |
| VCA0779 | 0.04 | 0.03 | 0.01  | 0.01  |

|         |       |      |       |       |
|---------|-------|------|-------|-------|
| VCA0780 | 0.08  | 0.09 | 0.03  | 0.04  |
| VCA0781 | 0.05  | 0.06 | 0.03  | 0.03  |
| VCA0782 | 0.04  | 0.05 | 0.08  | 0.06  |
| VCA0783 | 0.05  | 0.04 | 0.04  | 0.03  |
| VCA0784 | 0.09  | 0.06 | 0.06  | 0.06  |
| VCA0785 | 0.04  | 0.05 | 0.00  | -0.01 |
| VCA0786 | 0.07  | 0.06 | 0.02  | 0.02  |
| VCA0787 | 0.06  | 0.06 | 0.03  | 0.04  |
| VCA0788 | 0.07  | 0.08 | 0.06  | 0.06  |
| VCA0789 | 0.10  | 0.09 | 0.05  | 0.04  |
| VCA0790 | 0.06  | 0.07 | 0.02  | 0.03  |
| VCA0791 | 0.06  | 0.05 | 0.06  | 0.06  |
| VCA0792 | 0.05  | 0.03 | 0.04  | 0.05  |
| VCA0793 | 0.05  | 0.09 | 0.10  | 0.08  |
| VCA0794 | 0.04  | 0.07 | 0.07  | 0.05  |
| VCA0795 | 0.06  | 0.06 | 0.07  | 0.05  |
| VCA0796 | 0.09  | 0.10 | 0.04  | 0.05  |
| VCA0796 | 0.06  | 0.07 | 0.08  | 0.07  |
| VCA0797 | 0.06  | 0.11 | 0.08  | 0.07  |
| VCA0798 | 0.04  | 0.05 | 0.11  | 0.10  |
| VCA0799 | 0.07  | 0.06 | 0.07  | 0.04  |
| VCA0800 | 0.07  | 0.06 | 0.11  | 0.08  |
| VCA0801 | 0.08  | 0.08 | 0.05  | 0.04  |
| VCA0802 | 0.03  | 0.04 | 0.02  | 0.04  |
| VCA0803 | 0.02  | 0.02 | 0.04  | 0.05  |
| VCA0804 | 0.04  | 0.04 | 0.05  | 0.01  |
| VCA0805 | 0.04  | 0.04 | -0.02 | -0.02 |
| VCA0806 | 0.07  | 0.05 | 0.06  | 0.04  |
| VCA0807 | 0.06  | 0.07 | 0.06  | 0.06  |
| VCA0808 | 0.06  | 0.05 | 0.03  | 0.02  |
| VCA0809 | 0.04  | 0.04 | 0.02  | 0.02  |
| VCA0810 | 0.05  | 0.05 | 0.04  | 0.05  |
| VCA0810 | 0.05  | 0.06 | 0.04  | 0.05  |
| VCA0811 | 0.06  | 0.07 | 0.03  | 0.05  |
| VCA0812 | 0.16  | 0.17 | 0.06  | 0.06  |
| VCA0813 | 0.08  | 0.08 | 0.06  | 0.06  |
| VCA0814 | 0.06  | 0.07 | 0.08  | 0.08  |
| VCA0815 | 0.05  | 0.06 | 0.03  | 0.03  |
| VCA0815 | -0.03 | 0.00 | 0.02  | 0.04  |
| VCA0816 | 0.05  | 0.08 | 0.04  | 0.05  |
| VCA0816 | 0.05  | 0.07 | 0.04  | 0.05  |
| VCA0817 | 0.05  | 0.06 | 0.06  | 0.07  |
| VCA0819 | 0.09  | 0.09 | 0.06  | 0.05  |

|         |      |      |       |      |
|---------|------|------|-------|------|
| VCA0820 | 0.02 | 0.02 | 0.09  | 0.08 |
| VCA0821 | 0.05 | 0.05 | 0.04  | 0.05 |
| VCA0822 | 0.09 | 0.10 | 0.01  | 0.05 |
| VCA0823 | 0.07 | 0.06 | 0.05  | 0.05 |
| VCA0824 | 0.01 | 0.03 | 0.04  | 0.05 |
| VCA0824 | 0.01 | 0.03 | 0.04  | 0.04 |
| VCA0825 | 0.06 | 0.07 | 0.05  | 0.08 |
| VCA0826 | 0.06 | 0.07 | 0.05  | 0.04 |
| VCA0826 | 0.06 | 0.06 | 0.04  | 0.04 |
| VCA0827 | 0.12 | 0.11 | 0.05  | 0.05 |
| VCA0828 | 0.05 | 0.06 | 0.08  | 0.09 |
| VCA0830 | 0.01 | 0.01 | 0.04  | 0.04 |
| VCA0831 | 0.03 | 0.04 | 0.06  | 0.06 |
| VCA0832 | 0.06 | 0.03 | 0.06  | 0.07 |
| VCA0833 | 0.05 | 0.04 | 0.05  | 0.06 |
| VCA0834 | 0.05 | 0.03 | 0.08  | 0.06 |
| VCA0835 | 0.03 | 0.05 | 0.03  | 0.05 |
| VCA0836 | 0.03 | 0.02 | 0.04  | 0.06 |
| VCA0836 | 0.01 | 0.01 | 0.05  | 0.05 |
| VCA0837 | 0.05 | 0.05 | 0.09  | 0.13 |
| VCA0838 | 0.06 | 0.05 | 0.08  | 0.07 |
| VCA0839 | 0.02 | 0.02 | 0.06  | 0.07 |
| VCA0840 | 0.10 | 0.10 | 0.06  | 0.08 |
| VCA0841 | 0.05 | 0.06 | 0.09  | 0.09 |
| VCA0842 | 0.05 | 0.05 | 0.03  | 0.03 |
| VCA0842 | 0.05 | 0.06 | 0.05  | 0.05 |
| VCA0843 | 0.11 | 0.10 | 0.09  | 0.09 |
| VCA0844 | 0.05 | 0.06 | 0.03  | 0.03 |
| VCA0845 | 0.04 | 0.05 | 0.05  | 0.05 |
| VCA0846 | 0.08 | 0.06 | 0.06  | 0.08 |
| VCA0847 | 0.01 | 0.02 | 0.04  | 0.04 |
| VCA0848 | 0.01 | 0.01 | -0.01 | 0.02 |
| VCA0850 | 0.04 | 0.04 | 0.06  | 0.11 |
| VCA0851 | 0.08 | 0.07 | 0.05  | 0.08 |
| VCA0852 | 0.03 | 0.06 | 0.04  | 0.07 |
| VCA0853 | 0.11 | 0.09 | 0.04  | 0.04 |
| VCA0854 | 0.05 | 0.04 | 0.07  | 0.07 |
| VCA0855 | 0.08 | 0.09 | 0.06  | 0.03 |
| VCA0855 | 0.06 | 0.06 | 0.07  | 0.05 |
| VCA0856 | 0.05 | 0.07 | 0.06  | 0.08 |
| VCA0857 | 0.05 | 0.06 | 0.08  | 0.07 |
| VCA0858 | 0.04 | 0.05 | 0.05  | 0.05 |
| VCA0861 | 0.06 | 0.06 | 0.03  | 0.04 |

|         |      |      |       |       |
|---------|------|------|-------|-------|
| VCA0862 | 0.06 | 0.06 | 0.04  | 0.05  |
| VCA0863 | 0.07 | 0.06 | 0.05  | 0.05  |
| VCA0864 | 0.04 | 0.01 | 0.03  | 0.04  |
| VCA0865 | 0.03 | 0.04 | 0.08  | 0.06  |
| VCA0866 | 0.03 | 0.03 | 0.04  | 0.04  |
| VCA0867 | 0.02 | 0.03 | 0.02  | 0.02  |
| VCA0868 | 0.06 | 0.07 | 0.02  | 0.03  |
| VCA0869 | 0.05 | 0.06 | 0.05  | 0.05  |
| VCA0870 | 0.05 | 0.05 | 0.08  | 0.08  |
| VCA0871 | 0.05 | 0.03 | 0.02  | 0.02  |
| VCA0872 | 0.02 | 0.01 | 0.03  | 0.05  |
| VCA0873 | 0.05 | 0.07 | 0.03  | 0.03  |
| VCA0874 | 0.05 | 0.06 | 0.10  | 0.11  |
| VCA0875 | 0.05 | 0.05 | 0.07  | 0.06  |
| VCA0876 | 0.03 | 0.04 | 0.10  | 0.10  |
| VCA0878 | 0.07 | 0.09 | 0.04  | 0.04  |
| VCA0879 | 0.04 | 0.07 | 0.03  | 0.04  |
| VCA0879 | 0.07 | 0.07 | 0.06  | 0.05  |
| VCA0880 | 0.08 | 0.06 | 0.04  | 0.03  |
| VCA0882 | 0.04 | 0.05 | 0.05  | 0.04  |
| VCA0883 | 0.12 | 0.13 | 0.05  | 0.08  |
| VCA0884 | 0.03 | 0.03 | 0.04  | 0.05  |
| VCA0885 | 0.07 | 0.05 | 0.07  | 0.07  |
| VCA0886 | 0.07 | 0.07 | 0.08  | 0.08  |
| VCA0887 | 0.06 | 0.06 | 0.09  | 0.06  |
| VCA0888 | 0.07 | 0.05 | 0.06  | 0.04  |
| VCA0889 | 0.05 | 0.09 | 0.11  | 0.09  |
| VCA0890 | 0.08 | 0.06 | 0.09  | 0.11  |
| VCA0891 | 0.05 | 0.04 | 0.02  | 0.03  |
| VCA0892 | 0.08 | 0.09 | 0.04  | 0.03  |
| VCA0893 | 0.09 | 0.09 | 0.04  | 0.05  |
| VCA0894 | 0.06 | 0.08 | 0.08  | 0.07  |
| VCA0895 | 0.06 | 0.05 | 0.24  | 0.27  |
| VCA0896 | 0.04 | 0.05 | 0.05  | 0.05  |
| VCA0897 | 0.08 | 0.08 | 0.03  | 0.05  |
| VCA0898 | 0.05 | 0.05 | 0.05  | 0.07  |
| VCA0899 | 0.06 | 0.06 | 0.04  | 0.04  |
| VCA0900 | 0.06 | 0.05 | -0.03 | -0.02 |
| VCA0901 | 0.03 | 0.03 | 0.06  | 0.06  |
| VCA0902 | 0.04 | 0.03 | 0.08  | 0.06  |
| VCA0903 | 0.07 | 0.05 | 0.09  | 0.08  |
| VCA0904 | 0.06 | 0.03 | 0.10  | 0.09  |
| VCA0905 | 0.05 | 0.04 | 0.04  | 0.04  |

|         |       |       |       |       |
|---------|-------|-------|-------|-------|
| VCA0906 | 0.04  | 0.04  | 0.05  | 0.04  |
| VCA0907 | 0.06  | 0.04  | 0.10  | 0.10  |
| VCA0908 | 0.02  | 0.04  | 0.04  | 0.04  |
| VCA0909 | 0.04  | 0.04  | 0.05  | 0.06  |
| VCA0910 | 0.03  | 0.06  | 0.07  | 0.06  |
| VCA0911 | 0.08  | 0.08  | 0.03  | 0.03  |
| VCA0912 | 0.03  | 0.04  | 0.04  | 0.05  |
| VCA0913 | 0.04  | 0.09  | 0.07  | 0.06  |
| VCA0914 | 0.04  | 0.04  | 0.04  | 0.04  |
| VCA0915 | 0.05  | 0.04  | 0.04  | 0.05  |
| VCA0916 | 0.03  | 0.05  | 0.06  | 0.05  |
| VCA0917 | 0.11  | 0.07  | 0.07  | 0.08  |
| VCA0918 | 0.03  | 0.03  | 0.03  | 0.03  |
| VCA0918 | 0.03  | 0.06  | 0.05  | 0.06  |
| VCA0919 | 0.06  | 0.05  | 0.11  | 0.09  |
| VCA0920 | 0.03  | 0.04  | 0.04  | 0.09  |
| VCA0921 | 0.09  | 0.08  | 0.01  | 0.01  |
| VCA0922 | 0.05  | 0.06  | 0.07  | 0.05  |
| VCA0923 | -0.01 | -0.01 | 0.06  | 0.05  |
| VCA0924 | -0.01 | -0.01 | 0.01  | 0.00  |
| VCA0925 | 0.07  | 0.07  | 0.08  | 0.06  |
| VCA0926 | 0.04  | 0.07  | 0.05  | 0.03  |
| VCA0927 | 0.00  | 0.01  | 0.08  | 0.06  |
| VCA0928 | 0.00  | 0.00  | 0.07  | 0.04  |
| VCA0929 | 0.04  | 0.07  | 0.00  | 0.01  |
| VCA0930 | 0.02  | 0.02  | 0.05  | 0.04  |
| VCA0931 | 0.47  | 0.48  | 0.35  | 0.30  |
| VCA0932 | 0.06  | 0.06  | 0.07  | 0.06  |
| VCA0933 | 0.04  | 0.05  | 0.08  | 0.08  |
| VCA0934 | 0.05  | 0.06  | 0.04  | 0.04  |
| VCA0935 | 0.04  | 0.05  | 0.05  | 0.04  |
| VCA0936 | 0.03  | 0.03  | 0.09  | 0.08  |
| VCA0937 | 0.05  | 0.05  | 0.06  | 0.06  |
| VCA0938 | 0.03  | 0.03  | 0.05  | 0.04  |
| VCA0939 | 0.03  | 0.04  | -0.01 | -0.02 |
| VCA0940 | -0.01 | 0.02  | 0.04  | 0.07  |
| VCA0941 | 0.07  | 0.08  | 0.06  | 0.08  |
| VCA0942 | 0.07  | 0.06  | 0.03  | 0.03  |
| VCA0943 | 0.03  | 0.03  | 0.04  | 0.04  |
| VCA0944 | 0.04  | 0.03  | 0.04  | 0.05  |
| VCA0945 | 0.02  | 0.02  | 0.02  | 0.19  |
| VCA0946 | 0.05  | 0.05  | 0.03  | 0.04  |
| VCA0947 | 0.01  | 0.01  | 0.06  | 0.23  |

|         |      |       |       |      |
|---------|------|-------|-------|------|
| VCA0948 | 0.08 | 0.07  | 0.03  | 0.04 |
| VCA0949 | 0.05 | 0.06  | 0.02  | 0.02 |
| VCA0950 | 0.08 | 0.07  | 0.02  | 0.04 |
| VCA0951 | 0.02 | 0.01  | 0.03  | 0.04 |
| VCA0952 | 0.07 | 0.07  | 0.10  | 0.08 |
| VCA0953 | 0.04 | 0.06  | 0.02  | 0.04 |
| VCA0954 | 0.05 | 0.06  | 0.05  | 0.05 |
| VCA0955 | 0.00 | 0.00  | 0.03  | 0.07 |
| VCA0956 | 0.00 | -0.02 | -0.01 | 0.00 |
| VCA0957 | 0.06 | 0.06  | 0.04  | 0.03 |
| VCA0958 | 0.04 | 0.04  | 0.05  | 0.05 |
| VCA0959 | 0.12 | 0.07  | 0.06  | 0.05 |
| VCA0960 | 0.05 | 0.03  | 0.06  | 0.08 |
| VCA0961 | 0.04 | 0.05  | 0.03  | 0.05 |
| VCA0962 | 0.05 | 0.04  | 0.05  | 0.06 |
| VCA0963 | 0.01 | 0.01  | 0.16  | 0.04 |
| VCA0964 | 0.01 | 0.02  | 0.04  | 0.03 |
| VCA0965 | 0.00 | 0.01  | 0.11  | 0.14 |
| VCA0966 | 0.03 | 0.02  | 0.05  | 0.06 |
| VCA0967 | 0.06 | 0.07  | 0.03  | 0.04 |
| VCA0968 | 0.07 | 0.07  | 0.07  | 0.06 |
| VCA0969 | 0.07 | 0.08  | 0.05  | 0.07 |
| VCA0970 | 0.03 | 0.03  | 0.04  | 0.07 |
| VCA0971 | 0.03 | 0.03  | 0.03  | 0.05 |
| VCA0972 | 0.05 | 0.06  | 0.07  | 0.09 |
| VCA0973 | 0.07 | 0.08  | 0.07  | 0.05 |
| VCA0974 | 0.02 | 0.03  | 0.04  | 0.03 |
| VCA0975 | 0.03 | 0.03  | 0.05  | 0.05 |
| VCA0976 | 0.01 | 0.02  | 0.04  | 0.04 |
| VCA0977 | 0.04 | 0.05  | 0.06  | 0.05 |
| VCA0979 | 0.02 | 0.04  | 0.06  | 0.04 |
| VCA0980 | 0.02 | 0.00  | 0.04  | 0.05 |
| VCA0981 | 0.04 | 0.04  | 0.05  | 0.04 |
| VCA0982 | 0.01 | 0.01  | 0.07  | 0.05 |
| VCA0983 | 0.03 | 0.03  | 0.04  | 0.05 |
| VCA0984 | 0.03 | 0.07  | 0.06  | 0.04 |
| VCA0985 | 0.02 | 0.02  | 0.04  | 0.04 |
| VCA0986 | 0.02 | 0.02  | 0.06  | 0.05 |
| VCA0987 | 0.03 | 0.05  | 0.04  | 0.06 |
| VCA0988 | 0.03 | 0.03  | 0.04  | 0.05 |
| VCA0989 | 0.03 | 0.04  | 0.04  | 0.04 |
| VCA0990 | 0.03 | 0.03  | 0.07  | 0.07 |
| VCA0991 | 0.07 | 0.11  | 0.05  | 0.06 |

|         |      |      |      |      |
|---------|------|------|------|------|
| VCA0992 | 0.04 | 0.07 | 0.09 | 0.10 |
| VCA0993 | 0.06 | 0.06 | 0.09 | 0.09 |
| VCA0994 | 0.05 | 0.07 | 0.07 | 0.06 |
| VCA0995 | 0.05 | 0.08 | 0.07 | 0.06 |
| VCA0996 | 0.04 | 0.04 | 0.04 | 0.03 |
| VCA0997 | 0.04 | 0.04 | 0.06 | 0.05 |
| VCA0998 | 0.06 | 0.05 | 0.09 | 0.07 |
| VCA0999 | 0.05 | 0.07 | 0.10 | 0.09 |
| VCA1000 | 0.06 | 0.07 | 0.03 | 0.02 |
| VCA1001 | 0.08 | 0.11 | 0.06 | 0.05 |
| VCA1002 | 0.03 | 0.04 | 0.02 | 0.02 |
| VCA1003 | 0.05 | 0.07 | 0.08 | 0.06 |
| VCA1004 | 0.03 | 0.04 | 0.07 | 0.06 |
| VCA1005 | 0.02 | 0.05 | 0.06 | 0.05 |
| VCA1006 | 0.04 | 0.04 | 0.09 | 0.07 |
| VCA1007 | 0.05 | 0.07 | 0.06 | 0.07 |
| VCA1008 | 0.02 | 0.03 | 0.06 | 0.07 |
| VCA1009 | 0.05 | 0.06 | 0.07 | 0.04 |
| VCA1009 | 0.06 | 0.06 | 0.04 | 0.04 |
| VCA1010 | 0.12 | 0.13 | 0.06 | 0.07 |
| VCA1011 | 0.03 | 0.07 | 0.06 | 0.05 |
| VCA1012 | 0.07 | 0.12 | 0.06 | 0.04 |
| VCA1013 | 0.08 | 0.16 | 0.13 | 0.10 |
| VCA1014 | 0.04 | 0.13 | 0.03 | 0.03 |
| VCA1014 | 0.06 | 0.07 | 0.04 | 0.05 |
| VCA1015 | 0.03 | 0.02 | 0.09 | 0.09 |
| VCA1016 | 0.04 | 0.06 | 0.03 | 0.02 |
| VCA1017 | 0.03 | 0.04 | 0.06 | 0.06 |
| VCA1018 | 0.04 | 0.04 | 0.06 | 0.05 |
| VCA1019 | 0.05 | 0.03 | 0.04 | 0.03 |
| VCA1019 | 0.05 | 0.05 | 0.04 | 0.03 |
| VCA1021 | 0.04 | 0.05 | 0.07 | 0.08 |
| VCA1024 | 0.06 | 0.06 | 0.07 | 0.05 |
| VCA1025 | 0.08 | 0.10 | 0.07 | 0.08 |
| VCA1026 | 0.05 | 0.06 | 0.05 | 0.05 |
| VCA1027 | 0.05 | 0.11 | 0.06 | 0.05 |
| VCA1028 | 0.04 | 0.04 | 0.06 | 0.02 |
| VCA1029 | 0.07 | 0.03 | 0.02 | 0.03 |
| VCA1030 | 0.06 | 0.05 | 0.05 | 0.05 |
| VCA1031 | 0.01 | 0.05 | 0.02 | 0.03 |
| VCA1032 | 0.08 | 0.10 | 0.08 | 0.10 |
| VCA1033 | 0.08 | 0.05 | 0.06 | 0.10 |
| VCA1034 | 0.06 | 0.06 | 0.06 | 0.04 |



|         |       |       |       |       |
|---------|-------|-------|-------|-------|
| VCA1035 | 0.03  | 0.05  | 0.06  | 0.06  |
| VCA1037 | 0.01  | 0.06  | 0.04  | 0.05  |
| VCA1038 | 0.03  | 0.04  | 0.06  | 0.06  |
| VCA1039 | 0.02  | 0.02  | 0.04  | 0.03  |
| VCA1040 | 0.03  | 0.03  | 0.04  | 0.06  |
| VCA1041 | 0.06  | 0.07  | 0.06  | 0.05  |
| VCA1042 | 0.00  | 0.01  | 0.08  | 0.08  |
| VCA1043 | 0.03  | 0.03  | 0.04  | 0.05  |
| VCA1044 | 0.08  | 0.08  | 0.05  | 0.09  |
| VCA1045 | 0.07  | 0.07  | 0.05  | 0.04  |
| VCA1046 | 0.08  | 0.08  | 0.07  | 0.10  |
| VCA1047 | 0.07  | 0.08  | 0.08  | 0.10  |
| VCA1048 | 0.08  | 0.07  | 0.04  | 0.05  |
| VCA1049 | 0.03  | 0.03  | 0.04  | 0.04  |
| VCA1050 | 0.09  | 0.07  | 0.18  | 0.13  |
| VCA1051 | 0.05  | 0.08  | 0.05  | 0.06  |
| VCA1052 | 0.03  | 0.04  | 0.07  | 0.07  |
| VCA1053 | 0.04  | 0.04  | 0.04  | 0.06  |
| VCA1054 | 0.05  | 0.06  | 0.06  | 0.09  |
| VCA1055 | 0.03  | 0.02  | 0.04  | 0.06  |
| VCA1056 | 0.05  | 0.05  | -0.02 | -0.01 |
| VCA1057 | 0.05  | 0.05  | 0.05  | 0.06  |
| VCA1058 | 0.04  | 0.03  | 0.08  | 0.10  |
| VCA1059 | 0.06  | 0.06  | 0.04  | 0.04  |
| VCA1060 | 0.07  | 0.08  | 0.06  | 0.09  |
| VCA1061 | 0.05  | 0.05  | 0.03  | 0.04  |
| VCA1062 | 0.04  | 0.05  | 0.06  | 0.08  |
| VCA1063 | 0.05  | 0.05  | 0.06  | 0.04  |
| VCA1064 | 0.05  | 0.04  | 0.04  | 0.05  |
| VCA1065 | 0.07  | 0.08  | 0.05  | 0.06  |
| VCA1065 | 0.08  | 0.05  | 0.05  | 0.05  |
| VCA1066 | 0.07  | 0.05  | 0.05  | 0.05  |
| VCA1067 | 0.07  | 0.07  | 0.03  | 0.02  |
| VCA1068 | -0.01 | -0.02 | 0.08  | 0.07  |
| VCA1069 | 0.06  | 0.05  | 0.06  | 0.04  |
| VCA1070 | 0.03  | 0.03  | 0.09  | 0.08  |
| VCA1071 | 0.03  | 0.04  | 0.06  | 0.06  |
| VCA1072 | 0.06  | 0.05  | 0.01  | 0.03  |
| VCA1073 | 0.06  | 0.05  | 0.05  | 0.04  |
| VCA1074 | 0.06  | 0.07  | 0.14  | 0.16  |
| VCA1075 | 0.02  | 0.02  | 0.04  | 0.04  |
| VCA1076 | 0.04  | 0.04  | 0.06  | 0.06  |
| VCA1077 | 0.06  | 0.07  | 0.03  | 0.04  |

|         |      |      |      |       |
|---------|------|------|------|-------|
| VCA1078 | 0.03 | 0.03 | 0.04 | 0.03  |
| VCA1079 | 0.08 | 0.08 | 0.02 | 0.04  |
| VCA1080 | 0.03 | 0.03 | 0.06 | 0.05  |
| VCA1081 | 0.08 | 0.10 | 0.04 | 0.03  |
| VCA1083 | 0.61 | 0.61 | 0.54 | 0.58  |
| VCA1084 | 0.04 | 0.03 | 0.04 | 0.06  |
| VCA1085 | 0.06 | 0.06 | 0.05 | 0.04  |
| VCA1086 | 0.08 | 0.09 | 0.06 | 0.06  |
| VCA1087 | 0.08 | 0.09 | 0.06 | 0.07  |
| VCA1088 | 0.04 | 0.03 | 0.04 | 0.04  |
| VCA1089 | 0.02 | 0.05 | 0.05 | 0.05  |
| VCA1090 | 0.06 | 0.07 | 0.04 | 0.04  |
| VCA1091 | 0.04 | 0.06 | 0.05 | 0.06  |
| VCA1092 | 0.04 | 0.03 | 0.12 | 0.09  |
| VCA1093 | 0.06 | 0.05 | 0.05 | 0.06  |
| VCA1094 | 0.04 | 0.05 | 0.00 | -0.01 |
| VCA1095 | 0.04 | 0.04 | 0.02 | 0.02  |
| VCA1096 | 0.04 | 0.03 | 0.07 | 0.06  |
| VCA1097 | 0.03 | 0.03 | 0.03 | 0.08  |
| VCA1098 | 0.05 | 0.03 | 0.01 | 0.02  |
| VCA1099 | 0.01 | 0.04 | 0.07 | 0.08  |
| VCA1100 | 0.03 | 0.03 | 0.04 | 0.08  |
| VCA1101 | 0.02 | 0.02 | 0.06 | 0.04  |
| VCA1102 | 0.16 | 0.15 | 0.03 | 0.03  |
| VCA1103 | 0.07 | 0.07 | 0.03 | 0.04  |
| VCA1104 | 0.00 | 0.03 | 0.04 | 0.04  |
| VCA1105 | 0.00 | 0.02 | 0.06 | 0.04  |
| VCA1106 | 0.01 | 0.02 | 0.04 | 0.05  |
| VCA1106 | 0.00 | 0.02 | 0.05 | 0.04  |
| VCA1107 | 0.02 | 0.03 | 0.05 | 0.04  |
| VCA1108 | 0.01 | 0.03 | 0.05 | 0.06  |
| VCA1109 | 0.03 | 0.05 | 0.05 | 0.06  |
| VCA1110 | 0.01 | 0.00 | 0.17 | 0.15  |
| VCA1111 | 0.04 | 0.04 | 0.01 | 0.00  |
| VCA1112 | 0.04 | 0.05 | 0.04 | 0.04  |
| VCA1113 | 0.05 | 0.04 | 0.08 | 0.05  |
| VCA1114 | 0.08 | 0.08 | 0.03 | 0.03  |
| VCA1115 | 0.05 | 0.05 | 0.06 | 0.05  |

---
