# Supplementary material for: Systematic Identification of Cyclic-di-GMP Binding Proteins in Vibrio cholerae Reveals a Novel Class of Cyclic-di-GMP-Binding ATPases Associated with Type II Secretion Systems
Source: PubMed Central journal article supplement (PMC4624772; doi:10.1371/journal.ppat.1005232), 2015-10-27
Supplement: ppat.1005232.s008.pdf [file ppat.1005232.s008.pdf]

## S2 Table. Strains

| Strain                        | Description                                                                                                                                                                                                                        | Source    |
|-------------------------------|------------------------------------------------------------------------------------------------------------------------------------------------------------------------------------------------------------------------------------|-----------|
| NEB T7 Express I <sup>q</sup> | MiniF <i>lacI<sup>q</sup></i> (Cam <sup>R</sup> ) / <i>fhuA2 lacZ::T7 gene1 [lon] ompT gal sulA11</i><br><i>R(mcr-73::miniTn10--Tet<sup>S</sup>)2 [dcm] R(zgb-210::Tn10--Tet<sup>S</sup>) endA1</i><br><i>Δ(mcrC-mrr)114::IS10</i> | NEB       |
| FY_VC_9573                    | WT mTn7-gfp, Rif <sup>r</sup> Gm <sup>r</sup>                                                                                                                                                                                      | This work |
| FY_VC_9575                    | <i>ΔmshA</i> mTn7-gfp, Rif <sup>r</sup> Gm <sup>r</sup>                                                                                                                                                                            | This work |
| FY_VC_9586                    | <i>ΔmshE</i> mTn7-gfp, Rif <sup>r</sup> Gm <sup>r</sup>                                                                                                                                                                            | This work |
