# Supplementary material for: Systematic Identification of Cyclic-di-GMP Binding Proteins in Vibrio cholerae Reveals a Novel Class of Cyclic-di-GMP-Binding ATPases Associated with Type II Secretion Systems
Source: PubMed Central journal article supplement (PMC4624772; doi:10.1371/journal.ppat.1005232), 2015-10-27
Supplement: ppat.1005232.s009.pdf [file ppat.1005232.s009.pdf]

**S3 Table. Plasmids**

| Plasmid                                       | Description                                                                                                                                                     | Source            |
|-----------------------------------------------|-----------------------------------------------------------------------------------------------------------------------------------------------------------------|-------------------|
| pVL-Blunt                                     | pCR-Blunt derivative with restriction sites removed                                                                                                             | {Lee, 2007 #2089} |
| pVL791                                        | pET-19b derivative                                                                                                                                              | {Lee, 2007 #2089} |
| pVL847                                        | pET-19b derivative with an in-frame <i>mbp</i> between the His tag and the MCS                                                                                  | {Lee, 2007 #2089} |
| pVL-Blunt-MshE (VC0405)                       | MshE amplified with KR221 and KR228 and cloned into pVL-Blunt                                                                                                   | This work         |
| pVL-Blunt-PA14_29490                          | PA14_29490 amplified with KR203 and KR204 and cloned into pVL-Blunt                                                                                             | This work         |
| pVL-Blunt-PA14_58750                          | PA14_58750 amplified with KR205 and KR206 and cloned into pVL-Blunt                                                                                             | This work         |
| pVL-Blunt-PA14_55440                          | PA14_55440 amplified with KR207 and KR208 and cloned into pVL-Blunt                                                                                             | This work         |
| pVL-Blunt-PA14_23990                          | PA14_23990 amplified with KR209 and KR210 and cloned into pVL-Blunt                                                                                             | This work         |
| pVL-Blunt-PA14_68820                          | PA14_68820 amplified with KR211 and KR212 and cloned into pVL-Blunt                                                                                             | This work         |
| pVL-Blunt-PA14_59290                          | PA14_59290 amplified with KR213 and KR214 and cloned into pVL-Blunt                                                                                             | This work         |
| pVL-Blunt-PA14_05180                          | PA14_05180 amplified with KR215 and KR216 and cloned into pVL-Blunt                                                                                             | This work         |
| pVL-Blunt-PA14_05190                          | PA14_05190 amplified with KR217 and KR218 and cloned into pVL-Blunt                                                                                             | This work         |
| pVL-Blunt-PA14_59340                          | PA14_59340 amplified with KR219 and KR220 and cloned into pVL-Blunt                                                                                             | This work         |
| pVL-Blunt-MshE-F1                             | MshE Fragment 1 amplified with KR221 and KR222 and cloned into pVL-Blunt                                                                                        | This work         |
| pVL-Blunt-MshE-F2                             | MshE Fragment 2 amplified with KR221 and KR223 and cloned into pVL-Blunt                                                                                        | This work         |
| pVL-Blunt-MshE-F3                             | MshE Fragment 3 amplified with KR221 and KR224 and cloned into pVL-Blunt                                                                                        | This work         |
| pVL-Blunt-MshE-F4                             | MshE Fragment 4 amplified with KR225 and KR228 and cloned into pVL-Blunt                                                                                        | This work         |
| pVL-Blunt-MshE-F5                             | MshE Fragment 5 amplified with KR226 and KR228 and cloned into pVL-Blunt                                                                                        | This work         |
| pVL-Blunt-MshE-F6                             | MshE Fragment 6 amplified with KR227 and KR228 and cloned into pVL-Blunt                                                                                        | This work         |
| pVL791-MshE <sub>R9A, D12A</sub>              | MshE <sub>R9AD12A</sub> is introduced into pVL791-MshE using SH60 and SH61                                                                                      | This work         |
| pVL791-MshE <sub>R88A, R89A</sub>             | MshE <sub>R88AR89A</sub> is introduced into pVL791-MshE using SH76 and SH77                                                                                     | This work         |
| pVL-Blunt-MshE <sub>D108A, D111A</sub>        | MshE <sub>D108AD111A</sub> is introduced into pVL-Blunt-MshE using SH64 and SH65                                                                                | This work         |
| pVL-Blunt-MshE <sub>Y145A, R146A, R147A</sub> | MshE <sub>Y145AR146AR147A</sub> is introduced into pVL-Blunt-MshE using SH66 and SH67                                                                           | This work         |
| pVL-791-MshE <sub>Y145A, R146A, R147A</sub>   | MshE <sub>Y145AR146AR147A</sub> excised from pVL-Blunt-MshE <sub>Y145AR146AR147A</sub> with NdeI and BamHI and ligated into pVL791 digested with NdeI and BamHI | This work         |
| pVL791-MshE <sub>R146A, R147A</sub>           | MshE <sub>R146AR147A</sub> is introduced into pVL791-MshE <sub>Y145AR146AR147A</sub> using SH78 and SH79                                                        | This work         |
| pVL-Blunt-MshE <sub>E191A, D192A</sub>        | MshE <sub>E191AD192A</sub> is introduced into pVL-Blunt-MshE using SH68 and                                                                                     | This work         |

|                                 |                                                                                                                         |           |
|---------------------------------|-------------------------------------------------------------------------------------------------------------------------|-----------|
|                                 | SH69                                                                                                                    |           |
| pVL791-MshE <sub>R9A</sub>      | R9A is introduced into pVL791-MshE using SH72 and SH73                                                                  | This work |
| pVL791-MshE <sub>D12A</sub>     | D12A is introduced into pVL791-MshE <sub>R9AD12A</sub> using SH74 and SH75                                              | This work |
| pVL-Blunt-MshE <sub>Q32A</sub>  | Q32A is introduced into pVL-Blunt-MshE using KR229 and KR230                                                            | This work |
| pVL-Blunt-MshE <sub>E51A</sub>  | E51A is introduced into pVL-Blunt-MshE using KR231 and KR232                                                            | This work |
| pVL791-MshE <sub>R88A</sub>     | R88A is introduced into pVL791-MshE <sub>R88AR89A</sub> using SH85 and SH86                                             | This work |
| pVL791-MshE <sub>R89A</sub>     | R89A is introduced into pVL791-MshE <sub>R88AR89A</sub> using SH87 and SH88                                             | This work |
| pVL-Blunt-MshE <sub>D108A</sub> | D108A is introduced into pVL-Blunt-MshE using KR233 and KR234                                                           | This work |
| pVL791-MshE <sub>D111A</sub>    | D111A is introduced into pVL791-MshE using SH89 and SH90                                                                | This work |
| pVL-Blunt-MshE <sub>D142A</sub> | D142A is introduced into pVL-Blunt-MshE using KR235 and KR236                                                           | This work |
| pVL-Blunt-PA14_29490-F1         | PA14_29490 Fragment 1 was amplified with KR203 and SH54 and cloned into pVL-Blunt                                       | This work |
| pVL-Blunt-PA14_29490-F2         | PA14_29490 Fragment 2 was amplified with KR203 and SH55 and cloned into pVL-Blunt                                       | This work |
| pVL-Blunt-PA14_29490-F3         | PA14_29490 Fragment 3 was amplified with KR203 and SH56 and cloned into pVL-Blunt                                       | This work |
| pVL-Blunt-PA14_29490-F4         | PA14_29490 Fragment 4 was amplified with SH57 and KR204 and cloned into pVL-Blunt                                       | This work |
| pVL-Blunt-PA14_29490-F5         | PA14_29490 Fragment 5 was amplified with SH58 and KR204 and cloned into pVL-Blunt                                       | This work |
| pVL-Blunt-PA14_29490-F6         | PA14_29490 Fragment 6 was amplified with SH59 and KR204 and cloned into pVL-Blunt                                       | This work |
| pVL791-MshE (VC0405)            | MshE wild-type excised from pVL-Blunt-MshE with NdeI and BamHI and ligated into pVL791 digested with NdeI and BamHI     | This work |
| pVL791-VC0462                   | VC0462 isolated from His-ORF library                                                                                    | This work |
| pVL791-VC0463                   | VC0463 isolated from His-ORF library                                                                                    | This work |
| pVL791-VC2424                   | VC2424 isolated from His-ORF library                                                                                    | This work |
| pVL791-VC0835                   | VC0835 isolated from His-ORF library                                                                                    | This work |
| pVL791-VC2732                   | VC2732 isolated from His-ORF library                                                                                    | This work |
| pVL791-PA14_29490               | PA14_29490 excised from pVL-Blunt-PA14_29490 with NdeI and BamHI and ligated into pVL791 digested with NdeI and BamHI   | This work |
| pVL791-PA14_58750               | PA14_58750 excised from pVL-Blunt-PA14_58750 with AseI and BglII and ligated into pVL791 digested with NdeI and BamHI   | This work |
| pVL791-PA14_55440               | PA14_55440 excised from pVL-Blunt-PA14_55440 with NdeI and BamHI and ligated into pVL791 digested with NdeI and BamHI   | This work |
| pVL791-PA14_23990               | PA14_23990 excised from pVL-Blunt-PA14_29490 with NdeI and BamHI and ligated into pVL791 digested with NdeI and BamHI   | This work |
| pVL791-PA14_68820               | PA14_68820 excised from pVL-Blunt-PA14_68820 with NdeI and BamHI and ligated into pVL791 digested with NdeI and BamHI   | This work |
| pVL791-PA14_59290               | PA14_59290 excised from pVL-Blunt-PA14_59290 with NdeI and BglII and ligated into pVL791 digested with NdeI and BamHI   | This work |
| pVL791-PA14_05180               | PA14_05180 excised from pVL-Blunt-PA14_05180 with NdeI and BamHI and ligated into pVL791 digested with NdeI and BamHI   | This work |
| pVL791-PA14_05190               | PA14_05190 excised from pVL-Blunt-PA14_05190 with NdeI and BamHI and ligated into pVL791 digested with NdeI and BamHI   | This work |
| pVL791-PA14_59340               | PA14_59340 excised from pVL-Blunt-PA14_59340 with NdeI and XhoI and ligated into pVL791 digested with NdeI and XhoI     | This work |
| pVL847-MshE                     | MshE wild-type excised from pVL-Blunt-MshE with NdeI and BamHI and ligated into pBL847 digested with NdeI and BamHI     | This work |
| pVL847-MshE-F1                  | MshE Fragment 1 excised from pVL-Blunt-MshE-F1 with NdeI and BamHI and ligated into pBL847 digested with NdeI and BamHI | This work |
| pVL847-MshE-F2                  | MshE Fragment 2 excised from pVL-Blunt-MshE-F2 with NdeI and BamHI and ligated into pBL847 digested with NdeI and BamHI | This work |

|                                   |                                                                                                                                                                                       |           |
|-----------------------------------|---------------------------------------------------------------------------------------------------------------------------------------------------------------------------------------|-----------|
| pVL847-MshE-F3                    | BamHI and ligated into pBL847 digested with NdeI and BamHI<br>MshE Fragment 3 excised from pVL-Blunt-MshE-F3 with NdeI and BamHI and ligated into pBL847 digested with NdeI and BamHI | This work |
| pVL847-MshE-F4                    | MshE Fragment 4 excised from pVL-Blunt-MshE-F4 with NdeI and BamHI and ligated into pBL847 digested with NdeI and BamHI                                                               | This work |
| pVL847-MshE-F5                    | MshE Fragment 5 excised from pVL-Blunt-MshE-F5 with NdeI and BamHI and ligated into pBL847 digested with NdeI and BamHI                                                               | This work |
| pVL847-MshE-F6                    | MshE Fragment 6 excised from pVL-Blunt-MshE-F6 with NdeI and BamHI and ligated into pBL847 digested with NdeI and BamHI                                                               | This work |
| pVL847-MshE <sub>R9AD12A</sub>    | MshE <sub>R9AD12A</sub> excised from pVL791-MshE <sub>R9AD12A</sub> with NdeI and BamHI and ligated into pVL847 digested with NdeI and BamHI                                          | This work |
| pVL847-MshE <sub>R88AR89A</sub>   | MshE <sub>R88AR89A</sub> excised from pVL791-MshE <sub>R88AR89A</sub> with NdeI and BamHI and ligated into pVL847 digested with NdeI and BamHI                                        | This work |
| pVL847-MshE <sub>D108AD111A</sub> | MshE <sub>D108AD111A</sub> excised from pVL-Blunt-MshE <sub>D108AD111A</sub> with NdeI and BamHI and ligated into pVL847 digested with NdeI and BamHI                                 | This work |
| pVL847-MshE <sub>R146AR147A</sub> | MshE <sub>R146AR147A</sub> excised from pVL791-MshE with NdeI and BamHI and ligated into pVL847 digested with NdeI and BamHI                                                          | This work |
| pVL847-MshE <sub>E191AD192A</sub> | MshE <sub>E191AD192A</sub> excised from pVL-Blunt-MshE <sub>E191AD192A</sub> with NdeI and BamHI and ligated into pVL847 digested with NdeI and BamHI                                 | This work |
| pVL847-MshE <sub>R9A</sub>        | MshE <sub>R9A</sub> excised from pVL791-MshE <sub>R9A</sub> with NdeI and BamHI and ligated into pVL847 digested with NdeI and BamHI                                                  | This work |
| pVL847-MshE <sub>D12A</sub>       | MshE <sub>D12A</sub> excised from pVL791-MshE <sub>D12A</sub> with NdeI and BamHI and ligated into pVL847 digested with NdeI and BamHI                                                | This work |
| pVL847-MshE <sub>Q32A</sub>       | MshE <sub>Q32A</sub> excised from pVL-Blunt-MshE <sub>Q32A</sub> with NdeI and BamHI and ligated into pVL847 digested with NdeI and BamHI                                             | This work |
| pVL847-MshE <sub>E51A</sub>       | MshE <sub>E51A</sub> excised from pVL-Blunt-MshE <sub>E51A</sub> with NdeI and BamHI and ligated into pVL847 digested with NdeI and BamHI                                             | This work |
| pVL847-MshE <sub>R88A</sub>       | MshE <sub>R88A</sub> excised from pVL791-MshE <sub>R88A</sub> with NdeI and BamHI and ligated into pVL847 digested with NdeI and BamHI                                                | This work |
| pVL847-MshE <sub>R89A</sub>       | MshE <sub>R89A</sub> excised from pVL791-MshE <sub>R89A</sub> with NdeI and BamHI and ligated into pVL847 digested with NdeI and BamHI                                                | This work |
| pVL847-MshE <sub>D108A</sub>      | MshE <sub>D108A</sub> excised from pVL-Blunt-MshE <sub>D108A</sub> with NdeI and BamHI and ligated into pVL847 digested with NdeI and BamHI                                           | This work |
| pVL847-MshE <sub>D111A</sub>      | MshE <sub>D111A</sub> excised from pVL791-MshE <sub>D111A</sub> with NdeI and BamHI and ligated into pVL847 digested with NdeI and BamHI                                              | This work |
| pVL847-MshE <sub>D142A</sub>      | MshE <sub>D142A</sub> excised from pVL-Blunt-MshE <sub>D142A</sub> with NdeI and BamHI and ligated into pVL847 digested with NdeI and BamHI                                           | This work |
| pVL847-PA14_29490                 | PA14_29490 excised from pVL-Blunt-PA14_29490 with NdeI and BamHI and ligated into pVL847 digested with NdeI and BamHI                                                                 | This work |
| pVL847-PA14_29490-F1              | PA14_29490 Fragment 1 excised from pVL-Blunt-PA14_29490-F1 with NdeI and BamHI and ligated into pVL847 digested with NdeI and BamHI                                                   | This work |
| pVL847-PA14_29490-F2              | PA14_29490 Fragment 2 excised from pVL-Blunt-PA14_29490-F2 with NdeI and BamHI and ligated into pVL847 digested with NdeI and BamHI                                                   | This work |
| pVL847-PA14_29490-F3              | PA14_29490 Fragment 3 excised from pVL-Blunt-PA14_29490-F3 with NdeI and BamHI and ligated into pVL847 digested with NdeI and BamHI                                                   | This work |
| pVL847-PA14_29490-F4              | PA14_29490 Fragment 4 excised from pVL-Blunt-PA14_29490-F4 with NdeI and BamHI and ligated into pVL847 digested with NdeI and BamHI                                                   | This work |
| pVL847-PA14_29490-F5              | PA14_29490 Fragment 5 excised from pVL-Blunt-PA14_29490-F5 with NdeI and BamHI and ligated into pVL847 digested with NdeI and BamHI                                                   | This work |
| pVL847-PA14_29490-F6              | PA14_29490 Fragment 6 excised from pVL-Blunt-PA14_29490-F6 with NdeI and BamHI and ligated into pVL847 digested with NdeI and BamHI                                                   | This work |

|                                   |                                                                                                                                                    |                         |
|-----------------------------------|----------------------------------------------------------------------------------------------------------------------------------------------------|-------------------------|
| pVL393                            | pMMB derivative with a NdeI site added to the polylinker                                                                                           | {Lee,<br>2007<br>#2089} |
| pVL393-MshE                       | MshE excised from pVL791-MshE with NdeI and BamHI and ligated into pVL393 digested with NdeI and BamHI                                             | This work               |
| pVL393-MshE <sub>R9A</sub>        | MshE <sub>R9A</sub> excised from pVL791-MshE <sub>R9A</sub> with NdeI and BamHI and ligated into pVL393 digested with NdeI and BamHI               | This work               |
| pVL393-MshE <sub>D12A</sub>       | MshE <sub>D12A</sub> excised from pVL791-MshE <sub>D12A</sub> with NdeI and BamHI and ligated into pVL393 digested with NdeI and BamHI             | This work               |
| pVL393-MshE <sub>R88A, R89A</sub> | MshE <sub>R88A, R89A</sub> excised from pVL791-MshE <sub>R88A, R89A</sub> with NdeI and BamHI and ligated into pVL393 digested with NdeI and BamHI | This work               |

---
